# Supplementary material for: A tumor-agnostic, topology-informed scoring framework for drug repurposing: application to CDK4/6 inhibitor resistance in HR+ breast cancer
Source: Research Square preprint supplement (doi:10.21203/rs.3.rs-6447930/v1), 2025-05-06
Supplement: Supplementary file 1 [file 41e23605a526859d66640f4b.xlsx]

## Sheet: Sheet1
Gene	log2FoldChange	padj	absLogFC
ZSWIM6	1.0009	3.12e-23	1.0009
PLCH1	-1.00181	5.68e-08	1.00181
RAB32	-1.00184	1.45e-05	1.00184
CAPN8	1.00425	0.00355816	1.00425
DDX60	-1.00443	0.00604692	1.00443
C5orf42	1.00498	5.93e-05	1.00498
LYSMD1	-1.00544	2.28e-06	1.00544
NFAT5	1.0058	0.000753913	1.0058
DPYSL4	1.00734	0.00765822	1.00734
HIST1H2AM	1.01109	2.28e-06	1.01109
MDGA1	1.01143	0.000160257	1.01143
KCNK2	-1.01169	9.03e-26	1.01169
FZD7	1.01276	2.05e-11	1.01276
ARTN	-1.01363	0.000108728	1.01363
DZIP1L	-1.01426	0.0140237	1.01426
ANKS1B	1.01471	8.04e-12	1.01471
KLF13	1.0148	0.00125607	1.0148
SC5D	1.01793	1.29e-10	1.01793
FAM214B	1.01916	2.09e-08	1.01916
ARHGAP12	1.02025	6.66e-05	1.02025
CDCA7	-1.02065	1.32e-27	1.02065
TGFBR3L	-1.02398	0.00026478	1.02398
P2RX5	-1.02413	7.45e-05	1.02413
IRF1	-1.02493	2.66e-09	1.02493
LYN	-1.0259	1.82e-06	1.0259
PDZK1	1.02714	0.00514994	1.02714
CLDN23	-1.02738	6.76e-05	1.02738
ADAT2	1.02788	0.00352884	1.02788
MT2A	1.028	1.46e-09	1.028
PTPN22	1.02854	0.025864	1.02854
JRKL	-1.03082	0.00371529	1.03082
LYPD1	1.03212	0.0319522	1.03212
ITGB8	1.03256	0.0279698	1.03256
SCAMP5	-1.03262	1.59e-12	1.03262
TPK1	-1.03267	0.00272258	1.03267
E2F8	-1.03409	3.05e-06	1.03409
BNIP3L	1.03418	2.09e-10	1.03418
HIST1H3G	1.03429	0.0145947	1.03429
EMP1	-1.03461	0.000460888	1.03461
MCF2L2	1.03601	0.00397589	1.03601
TTBK2	1.03637	2.73e-09	1.03637
LCA5	1.03668	0.0047915	1.03668
FRMD4B	1.03697	2.63e-09	1.03697
UBQLN4	-1.03773	2.61e-24	1.03773
STXBP4	1.03832	0.000295875	1.03832
SLC26A2	1.03837	9.67e-07	1.03837
PKIG	1.03995	1.12e-12	1.03995
BDKRB2	-1.04042	0.0128004	1.04042
P2RY11	-1.04268	0.0111857	1.04268
MGAT4A	1.04285	2.48e-07	1.04285
ZNF98	1.04298	0.0307864	1.04298
SLC5A3	1.04408	8.4e-07	1.04408
GPC4	1.04444	4.28e-26	1.04444
SMTN	-1.04729	1.03e-18	1.04729
B3GNT8	-1.04742	0.0130563	1.04742
PXDC1	-1.0475	2.03e-05	1.0475
PIK3CD	-1.04804	0.00357194	1.04804
TSPYL2	1.04841	1.75e-22	1.04841
CLSTN3	1.05025	5.98e-10	1.05025
LBHD1	1.05063	9.22e-07	1.05063
KBTBD8	-1.05194	0.00257156	1.05194
REM2	1.05237	0.00608824	1.05237
BRDT	1.05276	0.02939	1.05276
TTYH1	-1.05367	0.000646817	1.05367
CYP2W1	1.05461	0.000338433	1.05461
DNMT3B	-1.05487	9.68e-12	1.05487
TRIM16	-1.05488	4.99e-19	1.05488
ADCK2	-1.05507	9.62e-21	1.05507
MAPRE2	1.05544	8.56e-10	1.05544
IGSF9	-1.05565	9e-33	1.05565
ANXA3	-1.0559	4.09e-07	1.0559
TRIM16L	-1.05622	2.69e-16	1.05622
FOS	1.05686	6.48e-05	1.05686
MYBL2	-1.05749	1.96e-13	1.05749
TNS4	-1.05841	0.00326641	1.05841
CECR1	-1.05854	0.0117714	1.05854
AXIN2	-1.06032	5.67e-08	1.06032
ISG20	-1.06048	0.000173666	1.06048
JMJD1C	1.06061	9.25e-06	1.06061
ABCA12	-1.06251	3.54e-07	1.06251
SERPINB8	1.06561	0.0106973	1.06561
WSB1	1.06624	7.25e-11	1.06624
DHRS3	-1.06877	0.0278446	1.06877
ABCA5	1.06927	1.62e-05	1.06927
TP53INP1	1.06977	2.05e-08	1.06977
RASSF1	-1.07123	4.65e-13	1.07123
SMYD2	-1.07239	4.8e-48	1.07239
ARAP3	-1.07299	0.0239749	1.07299
KIAA1407	1.07324	0.00123338	1.07324
CPEB3	1.07352	2.47e-08	1.07352
NGFR	-1.07553	0.00238209	1.07553
ABHD14A	-1.07562	3.67e-05	1.07562
SCARF1	1.07793	0.003215	1.07793
VTCN1	-1.07919	1.14e-12	1.07919
RPRM	1.0792	9.27e-15	1.0792
PARVB	1.07953	0.011759	1.07953
SCIN	-1.08164	2.74e-05	1.08164
C1R	1.08191	0.00893426	1.08191
FRMD3	1.0844	0.00118906	1.0844
ST20	-1.08487	0.000344295	1.08487
FZD9	-1.08499	0.00791184	1.08499
MID2	1.08559	3.29e-20	1.08559
F2R	1.08565	0.000963606	1.08565
PAQR3	1.08573	3.39e-06	1.08573
MOK	1.08573	1.79e-09	1.08573
SERINC2	-1.08778	3.05e-19	1.08778
SLC2A4	1.08991	0.0350994	1.08991
SLC9A6	-1.09008	6.97e-09	1.09008
GRHL1	1.0905	1.96e-21	1.0905
CFAP126	-1.09247	1.77e-07	1.09247
HSD17B6	-1.0932	8.63e-06	1.0932
ZNF697	1.09334	1.24e-08	1.09334
CYBRD1	1.09365	1.56e-22	1.09365
MIPEP	-1.0958	9.94e-34	1.0958
ARL6	1.09584	0.0360733	1.09584
NCAPG2	-1.09592	1.99e-09	1.09592
RHCG	-1.096	0.00653125	1.096
PBXIP1	1.09634	4.38e-11	1.09634
CDNF	1.09651	2.88e-05	1.09651
XKR9	1.09755	0.00113691	1.09755
ARHGAP42	1.09765	0.013061	1.09765
TRANK1	-1.09794	0.000191439	1.09794
LBR	-1.09998	1.12e-11	1.09998
SKA3	-1.10192	2.93e-07	1.10192
UPK1A	-1.1026	0.037609	1.1026
GRM4	-1.10417	0.000365718	1.10417
PLEKHM3	1.10618	7.92e-11	1.10618
C21orf91	1.10759	9.27e-05	1.10759
IGFBPL1	-1.10833	0.00384262	1.10833
PPM1M	-1.10835	8.7e-10	1.10835
IFIT1	-1.10961	0.0102825	1.10961
GALNT4	1.10977	0.0308102	1.10977
RAB30	1.11013	1.19e-16	1.11013
PRR22	-1.11071	0.000629726	1.11071
S100P	-1.11078	0.034282	1.11078
TEX14	-1.11112	0.00304316	1.11112
NEK11	-1.11118	3.31e-07	1.11118
GAL	-1.11231	4.43e-10	1.11231
TMEM67	1.11241	0.00050504	1.11241
DMRTA1	-1.11242	0.00183048	1.11242
BHLHE41	1.11339	0.000353527	1.11339
MLLT3	1.11422	4.49e-10	1.11422
SCN8A	-1.11484	0.00107612	1.11484
CASP9	1.11598	9.78e-08	1.11598
CLMN	-1.11612	1.84e-39	1.11612
C1QTNF9B-AS1	-1.11642	0.0301309	1.11642
GBP4	-1.11809	0.0241882	1.11809
CFAP44	1.11913	0.000295699	1.11913
CYP27A1	-1.1208	0.004121	1.1208
MACROD2	-1.12095	9.6e-05	1.12095
SEMA3E	1.12252	1.62e-05	1.12252
CTSZ	-1.12511	1.31e-27	1.12511
ZFAND4	1.12546	0.0195948	1.12546
HIST1H3E	1.1259	2.29e-05	1.1259
VPS13C	1.12605	0.00354331	1.12605
RAB3B	-1.12618	0.0223064	1.12618
NOXRED1	1.12664	0.00952567	1.12664
MMP11	-1.12664	0.000365718	1.12664
MSMO1	1.12709	5.09e-13	1.12709
PLEKHG6	-1.12768	5.52e-06	1.12768
AMIGO3	-1.1279	2.59e-07	1.1279
EXO1	-1.13134	2.58e-06	1.13134
KHK	-1.13311	3.37e-15	1.13311
CMYA5	1.13361	0.00195848	1.13361
FYN	-1.1337	0.0366697	1.1337
MARCKS	-1.1338	1.33e-33	1.1338
CLIP4	1.13424	0.00458193	1.13424
OASL	-1.13456	8.53e-05	1.13456
USP18	-1.13664	1.18e-07	1.13664
ZBTB32	1.13673	0.00366679	1.13673
DHRS2	1.13832	2.6e-11	1.13832
CLEC7A	1.13833	0.0463098	1.13833
NDRG4	1.13886	2.89e-19	1.13886
PCDHAC2	1.14064	2.97e-05	1.14064
CCHCR1	-1.14134	5.57e-16	1.14134
RARRES3	-1.14231	1.32e-05	1.14231
DEF6	-1.1431	1.49e-06	1.1431
ARMC4	1.14314	0.0247245	1.14314
C9orf106	-1.14396	0.0116213	1.14396
KLF9	1.146	7.9e-17	1.146
HIST1H2BF	1.14678	0.00399501	1.14678
ZNF248	1.14705	2e-06	1.14705
PLXNB3	1.14739	6.51e-16	1.14739
HMGCS1	1.14772	3.59e-12	1.14772
SLC24A3	-1.14791	4.45e-13	1.14791
MEST	-1.14791	1.08e-38	1.14791
DOK3	-1.14885	0.00148027	1.14885
CHRD	1.15394	2.62e-05	1.15394
EHD2	-1.15439	5.11e-08	1.15439
METTL7B	1.15453	1.06e-07	1.15453
SIRPA	-1.15546	1.38e-08	1.15546
FNIP2	1.15551	1.38e-10	1.15551
C7orf49	-1.15686	1.16e-13	1.15686
ACOXL	1.15688	0.00125278	1.15688
TGFBR2	1.15698	1.04e-16	1.15698
SOX9	1.15708	6.15e-10	1.15708
SLC16A9	-1.15772	1.35e-05	1.15772
SMAD9	-1.15813	5.32e-07	1.15813
PPP1R3C	1.15827	1.59e-13	1.15827
IQGAP3	-1.15874	1.02e-19	1.15874
PCDHGA6	1.15888	0.00713003	1.15888
DGKG	1.16026	0.019711	1.16026
GRIN2D	-1.16033	3.82e-05	1.16033
FXYD3	-1.16056	1.22e-19	1.16056
TMEM180	-1.16082	8.22e-14	1.16082
OLFML3	1.16197	0.0384253	1.16197
PCDH9	-1.16257	0.000560818	1.16257
LEPR	-1.1631	0.00538422	1.1631
SFXN3	1.16376	7.46e-15	1.16376
STON1	-1.1642	5.49e-06	1.1642
KCNH2	-1.16434	2.2e-19	1.16434
BHLHE40	1.1649	1.54e-23	1.1649
TNFRSF11B	1.16554	9.89e-09	1.16554
TNFAIP8L3	1.16574	0.00045473	1.16574
ACSL1	1.16654	0.000108329	1.16654
PGBD5	-1.16938	3.67e-06	1.16938
DDIT3	1.17204	4.42e-06	1.17204
ECM1	-1.17322	0.0358728	1.17322
IMPDH1	-1.17399	1.05e-42	1.17399
ASS1	1.17557	1.59e-25	1.17557
ADORA2B	-1.17674	0.000640795	1.17674
RUSC1	-1.17705	1.93e-28	1.17705
FSIP2	-1.17706	0.0186304	1.17706
HTR1D	-1.1788	0.00206341	1.1788
LYPD3	-1.18126	2.67e-13	1.18126
IGFBP6	-1.1818	0.000131867	1.1818
HMGCR	1.18331	3.84e-12	1.18331
S100A4	1.18484	2.44e-06	1.18484
SMIM1	1.18496	8.85e-06	1.18496
TARP	1.18549	0.0405925	1.18549
RNASE4	-1.1872	0.0299367	1.1872
CECR6	-1.18776	0.041544	1.18776
GAS2L1	-1.1894	3.22e-28	1.1894
C5orf49	1.18965	3.38e-06	1.18965
CAMK2B	1.18977	4.17e-15	1.18977
AARD	1.19121	4.45e-21	1.19121
VEGFC	-1.19353	0.000332809	1.19353
KRT80	-1.1957	5.69e-09	1.1957
FAM149A	-1.19662	0.00732741	1.19662
ALCAM	-1.19687	6.56e-14	1.19687
ENHO	-1.19705	0.00543613	1.19705
PNRC1	1.1971	3.1e-20	1.1971
SPIN3	1.2001	2.21e-09	1.2001
CLDN15	-1.20062	1.25e-07	1.20062
KCND3	1.20254	0.0010444	1.20254
DUSP4	1.20518	2.43e-22	1.20518
WDR19	1.20608	9.83e-08	1.20608
NUDT4	-1.20609	1.64e-26	1.20609
NMI	-1.20684	3.56e-15	1.20684
CASP14	-1.20728	0.00725653	1.20728
ZNF763	1.20804	0.0139339	1.20804
BRI3	1.20917	1.43e-06	1.20917
HIST1H3H	1.20984	1.07e-09	1.20984
ZNF124	-1.21022	0.0073773	1.21022
CDC42EP3	1.21222	0.00216844	1.21222
ACE	1.21308	5.44e-12	1.21308
LDLRAD1	1.21365	0.0176383	1.21365
PGM2L1	1.21831	7.1e-05	1.21831
PARP12	-1.22001	1.49e-08	1.22001
C19orf66	-1.22335	6.28e-06	1.22335
NRCAM	1.2253	8.73e-20	1.2253
DLG2	1.22568	0.0484236	1.22568
POPDC3	1.22613	3.73e-05	1.22613
EDN1	-1.22717	9.29e-24	1.22717
TMEM40	-1.22804	0.010016	1.22804
HIST1H2BG	1.2284	9.74e-09	1.2284
TEX19	-1.2297	0.0367999	1.2297
SCD	1.23105	0.00643959	1.23105
CCDC83	1.23562	0.00132821	1.23562
SEMA6B	-1.23726	3.14e-09	1.23726
ARHGAP18	1.23768	7.88e-10	1.23768
SRGAP3	1.23784	4.43e-17	1.23784
CDK6	1.2381	4.83e-11	1.2381
SOCS1	-1.24013	0.000209367	1.24013
PPT1	-1.24089	3.61e-42	1.24089
C19orf57	-1.24134	2.72e-08	1.24134
CRYBG3	1.2429	0.00788418	1.2429
TNS1	-1.24412	7.52e-08	1.24412
ANKRD30B	1.24817	1.52e-05	1.24817
GPR179	-1.25048	0.0472029	1.25048
MBLAC1	-1.25631	1.45e-05	1.25631
TRIM71	1.25671	0.000185725	1.25671
RMDN2	1.25761	0.0293095	1.25761
SLC44A3	-1.25914	2.65e-09	1.25914
ARPIN	-1.25997	1.28e-07	1.25997
PCOLCE	-1.26278	0.000176163	1.26278
NRG2	1.26312	7.25e-06	1.26312
LAMB1	-1.26444	1.15e-18	1.26444
ADAMTS9	1.26521	4.18e-09	1.26521
ZNF608	1.26881	0.00206959	1.26881
TENM1	1.26919	0.00272676	1.26919
KNDC1	1.27078	0.000482017	1.27078
C1orf228	1.27225	0.0195231	1.27225
BAMBI	-1.2745	4.63e-18	1.2745
GPR155	1.27541	2.08e-06	1.27541
WNT6	-1.27605	0.00525104	1.27605
CITED4	-1.27694	2.36e-09	1.27694
BHLHA15	1.27695	0.0331935	1.27695
FGD1	-1.27779	3.83e-25	1.27779
MAOB	1.27893	8.67e-21	1.27893
UPK2	-1.27946	6.31e-05	1.27946
IFITM10	1.27983	0.000189883	1.27983
VCAN	-1.28087	0.021496	1.28087
SLC27A2	1.28166	4.05e-12	1.28166
NFATC4	-1.28324	2.08e-09	1.28324
CEACAM19	-1.28614	4.09e-08	1.28614
HIST2H2BF	1.28631	0.0373779	1.28631
MKX	1.28676	0.0260652	1.28676
CLGN	-1.2883	0.00104931	1.2883
SEMA6A	1.28848	2.72e-15	1.28848
SERPINA1	1.28874	7.61e-09	1.28874
SAMHD1	-1.28978	2.78e-17	1.28978
CEP162	1.29051	0.00054087	1.29051
FNDC8	-1.29077	0.00463912	1.29077
EGR3	1.29277	6.52e-18	1.29277
STAT4	-1.29404	0.0358065	1.29404
BRINP2	-1.29572	6.02e-06	1.29572
FRAS1	1.29624	0.000367151	1.29624
IRS4	1.29704	0.01295	1.29704
PCDHGA7	1.29769	0.0172809	1.29769
OLFM2	-1.29795	9.06e-08	1.29795
CYP2S1	-1.29891	0.0271066	1.29891
MBNL2	1.29983	9.26e-12	1.29983
GABRG2	-1.30067	6.83e-07	1.30067
CCL5	-1.30313	0.00172385	1.30313
GALNT11	-1.30425	7.41e-40	1.30425
CACNA1H	1.30716	3.29e-45	1.30716
ABAT	1.30761	4.02e-47	1.30761
CA8	-1.30842	0.000158006	1.30842
AEN	-1.30877	6.3e-17	1.30877
TRIM21	-1.30966	1.36e-06	1.30966
ZNF488	-1.3118	0.0373949	1.3118
MEGF9	1.31266	1.62e-35	1.31266
HIST1H2AI	1.31293	7.69e-06	1.31293
CSPG5	-1.31412	3.74e-08	1.31412
TMEM140	-1.31707	2.42e-12	1.31707
PAPSS2	1.31817	3.58e-21	1.31817
PSMB8	-1.31904	1.09e-12	1.31904
CHST3	1.31937	0.000634505	1.31937
GLOD5	1.32	0.0495852	1.32
TRIM9	-1.32027	0.00287187	1.32027
AMY2B	1.32214	0.0452888	1.32214
DNASE2B	1.32221	0.0220727	1.32221
RGS16	-1.32623	3.37e-15	1.32623
DIAPH3	-1.33008	1.65e-13	1.33008
DYNC2H1	1.33041	2.21e-06	1.33041
CLMP	1.33252	0.0134765	1.33252
GPR63	-1.33374	1.57e-07	1.33374
TFPI	-1.33446	4.79e-25	1.33446
FHOD3	-1.33579	1.05e-05	1.33579
MX2	-1.33649	0.0105506	1.33649
REPS2	1.3379	1.88e-24	1.3379
LZTFL1	1.3389	4.71e-09	1.3389
FHL2	-1.34039	9.16e-15	1.34039
RPGRIP1	-1.34046	0.0183438	1.34046
RSAD2	-1.34053	0.000131128	1.34053
DNAH6	1.34247	0.0223527	1.34247
TNFSF10	-1.34259	1.65e-07	1.34259
CEMIP	1.34453	5.48e-15	1.34453
LRRC10B	1.34512	4.69e-07	1.34512
SNX25	1.3477	9.58e-21	1.3477
NFE2	1.3487	0.00897609	1.3487
FAM78A	-1.35017	3.36e-09	1.35017
ZBTB7C	1.3544	9e-07	1.3544
CCNG2	1.35928	1.4e-38	1.35928
ZNF618	-1.3621	1.31e-35	1.3621
CALML5	-1.36304	1.67e-14	1.36304
APBB1	1.36394	0.0196718	1.36394
CIB3	-1.36436	0.00485724	1.36436
COL12A1	-1.36489	7.97e-11	1.36489
ZNF185	-1.36575	1.7e-19	1.36575
DRD1	-1.3667	1.32e-06	1.3667
KRTAP5-1	-1.36771	0.00378733	1.36771
FAM65C	-1.3685	3.22e-10	1.3685
HIP1	-1.37008	1.65e-56	1.37008
ETV5	1.37124	1.8e-11	1.37124
ACSL4	1.37274	0.00257506	1.37274
HHEX	1.37343	6.86e-12	1.37343
ALOXE3	1.37498	0.000523483	1.37498
CDH18	-1.377	2.09e-08	1.377
CHCHD3	-1.37738	3.23e-46	1.37738
TRPV4	-1.3777	0.000897716	1.3777
CACNA2D4	-1.37926	0.0338792	1.37926
LGALS3BP	-1.38116	5.85e-09	1.38116
SIPA1	1.38302	1.3e-06	1.38302
TGM2	-1.38412	0.0401885	1.38412
PRTFDC1	-1.38439	4.53e-05	1.38439
LOC728392	1.38544	0.00463042	1.38544
LXN	1.38583	1.75e-18	1.38583
GPRC5A	1.3904	4.31e-12	1.3904
ZNF189	-1.39041	0.000230094	1.39041
CHD5	1.39328	5.27e-15	1.39328
MAN1A1	1.39466	4.61e-25	1.39466
CFAP45	-1.3965	2.21e-07	1.3965
CHST8	-1.39682	0.00135848	1.39682
PTRF	-1.3973	0.0153418	1.3973
HIST1H2AG	1.39949	2.36e-07	1.39949
STOM	-1.40089	5.08e-64	1.40089
HIST2H2BE	1.4044	1.92e-14	1.4044
KLHL24	1.40633	1.03e-08	1.40633
TLR5	-1.40965	0.00433946	1.40965
LTBP1	-1.41136	2.44e-39	1.41136
SAMD9	-1.41176	0.000101202	1.41176
PYGO1	-1.41493	0.000405405	1.41493
BCHE	-1.41505	2.73e-05	1.41505
C10orf55	-1.41825	0.0254438	1.41825
NPIPB5	1.42087	0.00991624	1.42087
PCDHGA8	1.42485	0.0159994	1.42485
PPM1J	1.43181	9e-19	1.43181
CCDC28B	-1.43265	1.42e-09	1.43265
FAM101B	-1.43291	0.00114569	1.43291
B4GALNT3	1.43391	2.23e-09	1.43391
ERP27	-1.44001	0.000518618	1.44001
ZNF292	1.441	2.24e-06	1.441
MBOAT1	-1.44105	4.5e-09	1.44105
CYP1A1	-1.4435	0.00347598	1.4435
CXADR	1.44517	2.1e-05	1.44517
CLEC3A	1.44689	2.81e-24	1.44689
TGFBI	1.45313	0.000809736	1.45313
PTPRN2	-1.45407	1.32e-06	1.45407
SAMD13	1.4543	1.49e-07	1.4543
LRRK1	-1.45435	8.17e-11	1.45435
DUSP6	1.45764	1.39e-23	1.45764
SLITRK4	-1.45984	0.0244014	1.45984
WNT3A	-1.46424	1.86e-05	1.46424
IGF2BP1	-1.47035	6.38e-09	1.47035
RORA	1.47402	0.0155047	1.47402
KCNJ14	-1.47871	2.48e-07	1.47871
BTG2	1.48693	2.93e-25	1.48693
ZNF462	-1.48764	1.76e-14	1.48764
C15orf65	1.49105	0.000208799	1.49105
KCNC1	-1.49287	0.0329243	1.49287
DGAT2	-1.49319	4e-09	1.49319
HOGA1	1.50394	0.00483786	1.50394
PRSS27	-1.50493	2.21e-07	1.50493
NPHP1	-1.50621	0.0201305	1.50621
GDPD3	-1.5064	1.51e-25	1.5064
NR1I3	-1.50758	0.00819937	1.50758
TAP1	-1.50951	3.07e-15	1.50951
EGLN3	-1.5099	2.87e-21	1.5099
SEMA3F	-1.51026	9.6e-32	1.51026
B3GNT4	-1.51158	0.000656137	1.51158
PKNOX2	1.51189	0.0126074	1.51189
CCDC39	1.51373	0.00172466	1.51373
FAM20A	1.51435	0.0495136	1.51435
SLC16A4	-1.51641	1.84e-07	1.51641
ZFPM2	1.51977	0.00135512	1.51977
THBD	1.52141	7.33e-08	1.52141
INSIG2	1.52278	5.62e-15	1.52278
ISL2	-1.52499	0.00243771	1.52499
STON2	1.53081	8.99e-22	1.53081
TNIK	1.53219	1.56e-35	1.53219
NXPH3	-1.53315	8.67e-06	1.53315
PVALB	-1.5332	7.6e-12	1.5332
PHLDA1	1.53393	1.8e-35	1.53393
DUSP15	1.5353	1.15e-05	1.5353
RHD	1.53608	0.041294	1.53608
RASL11A	-1.53653	2.99e-15	1.53653
POU5F1B	-1.53819	0.0301007	1.53819
USP53	1.54096	4.26e-10	1.54096
TLE6	-1.54245	3.6e-06	1.54245
ANG	-1.54387	0.00248315	1.54387
CFB	-1.54434	0.00586341	1.54434
NUDT7	1.54496	2.62e-07	1.54496
TACC2	1.54558	2.91e-18	1.54558
FGD3	-1.54686	5.34e-09	1.54686
POU6F1	-1.54829	0.0144378	1.54829
NAV2	1.5509	1.9e-11	1.5509
CLPSL1	-1.55203	0.00155257	1.55203
DDR2	1.55313	0.0230985	1.55313
SH3TC1	-1.55345	0.00214179	1.55345
CFAP53	1.55682	0.023457	1.55682
KRT15	1.55851	7.45e-05	1.55851
MID1	-1.56331	1.14e-09	1.56331
OLFML2A	-1.56568	6.15e-09	1.56568
PAPL	-1.56656	4.68e-07	1.56656
BMPR1B	1.56704	6.7e-30	1.56704
CTSC	-1.57606	4.62e-11	1.57606
ANO1	-1.58094	9.98e-09	1.58094
KRT81	-1.5816	2.35e-08	1.5816
PROM1	-1.58228	0.00860726	1.58228
MAST1	-1.58541	5.63e-06	1.58541
LRRC29	1.58671	9.91e-06	1.58671
FXYD6	1.58789	0.00147997	1.58789
TP63	-1.59589	5.42e-09	1.59589
DEPTOR	1.5968	4.28e-14	1.5968
OAS2	-1.59709	9.8e-05	1.59709
GJA3	1.59711	0.00187841	1.59711
IMMP2L	-1.59751	3.13e-06	1.59751
CNNM2	1.6056	7.34e-19	1.6056
PDZD7	1.60586	6.23e-13	1.60586
ACHE	-1.60754	7.35e-05	1.60754
HYAL3	-1.61146	1.38e-11	1.61146
AFF3	1.6123	1.81e-48	1.6123
C16orf62	-1.61583	1.39e-16	1.61583
FAM189B	-1.61735	6.98e-49	1.61735
ZNF385C	-1.62039	0.0480782	1.62039
CCDC82	-1.62054	0.0308834	1.62054
CYP26B1	-1.62074	6.15e-06	1.62074
PCDHB14	1.62103	0.00014372	1.62103
STAT6	-1.62156	2.14e-09	1.62156
CREBRF	1.62184	1.03e-08	1.62184
MFAP2	-1.62322	0.000208926	1.62322
ST8SIA1	-1.62545	0.0150403	1.62545
HIST1H4I	1.62677	0.00397241	1.62677
THPO	1.62853	0.0219124	1.62853
CLSTN2	1.62993	6.76e-30	1.62993
FLT3LG	-1.63158	0.000144333	1.63158
PDCD4	1.63211	3.75e-47	1.63211
FAM198A	-1.63284	2.54e-11	1.63284
GAS2L2	1.63393	0.010947	1.63393
STXBP5L	1.63498	1.43e-05	1.63498
MACC1	-1.63818	2.15e-08	1.63818
MYCN	-1.6388	0.000462459	1.6388
IL17REL	-1.6425	0.000250012	1.6425
SMARCD3	-1.64354	5.13e-27	1.64354
OR8G5	1.64475	0.00435944	1.64475
CCDC89	1.64554	0.00010041	1.64554
ARMCX2	-1.6513	1.92e-07	1.6513
NAALADL2	-1.65197	4.77e-06	1.65197
LONRF2	1.65595	7.13e-41	1.65595
FAM110D	-1.65658	0.00681371	1.65658
HIST1H3B	1.65687	0.0130161	1.65687
SLC6A12	1.6572	0.0044395	1.6572
TREX2	-1.65815	0.0117081	1.65815
VMO1	-1.67046	3.02e-10	1.67046
RASL10B	-1.67145	1.45e-06	1.67145
SOX3	1.67266	0.0369766	1.67266
ARHGAP26	1.67312	2.53e-15	1.67312
GPR19	-1.67606	1.3e-07	1.67606
SERPINE1	-1.67785	1.35e-05	1.67785
TMPRSS6	1.68009	0.000132655	1.68009
APOBR	-1.68207	4.85e-15	1.68207
HOXC10	-1.68808	2.28e-15	1.68808
FILIP1L	1.69243	0.000429424	1.69243
ENPP5	1.69365	1.72e-15	1.69365
WBSCR28	-1.69495	0.0325764	1.69495
YPEL2	1.69538	9.61e-19	1.69538
FAM71F2	-1.6959	0.0360867	1.6959
PGM5	-1.69915	1.21e-15	1.69915
PCDHB13	1.69936	0.00132472	1.69936
TMEM108	1.70243	0.00050893	1.70243
STC1	1.70279	1.38e-07	1.70279
LIMCH1	1.70432	7.1e-22	1.70432
UNC5C	1.70547	1.88e-11	1.70547
NMU	-1.70621	2.85e-12	1.70621
RBM20	1.70807	0.000560308	1.70807
CAPN9	-1.71009	2.41e-10	1.71009
KMO	-1.71379	0.00252004	1.71379
ADAM19	-1.71522	3.03e-05	1.71522
CHN2	1.71658	1.89e-20	1.71658
HERC6	-1.71661	5.83e-09	1.71661
SMPD3	-1.71854	6.87e-13	1.71854
FAM114A1	-1.72446	4.09e-25	1.72446
ZNF469	-1.72473	1.35e-09	1.72473
PPP3CA	1.72591	2.88e-60	1.72591
VWA7	-1.72731	0.0133557	1.72731
IGFBP5	1.7291	2.97e-38	1.7291
DIRAS1	-1.72911	2.35e-12	1.72911
FAM178B	1.72958	9.46e-14	1.72958
FLT1	-1.73015	0.0229516	1.73015
WLS	-1.73096	1.34e-15	1.73096
DNAH5	-1.73234	3.68e-07	1.73234
ALOX12B	1.73364	4.02e-07	1.73364
KRTAP3-1	-1.7345	0.0491014	1.7345
ID3	-1.73532	3.38e-20	1.73532
C3orf67	-1.73638	4.43e-09	1.73638
TM4SF1	-1.74016	1.03e-29	1.74016
ACTA2	-1.74656	8.47e-14	1.74656
KLF7	-1.74761	2.95e-15	1.74761
TINAGL1	1.75375	6.41e-07	1.75375
MRAS	-1.75511	2.31e-14	1.75511
PBLD	1.75563	4.04e-27	1.75563
C1GALT1	1.7557	4.12e-13	1.7557
NR4A2	1.75985	4.46e-28	1.75985
STARD8	-1.76122	3.47e-05	1.76122
HSD17B11	-1.76297	0.00977956	1.76297
EGR2	1.76325	0.000145008	1.76325
ANKRD30A	1.76525	0.00384775	1.76525
LCP1	-1.76841	4.13e-43	1.76841
FMOD	-1.76936	0.00132761	1.76936
TESC	-1.77594	0.00376023	1.77594
GABRA1	-1.77624	0.0270556	1.77624
GRHL3	-1.7896	5.08e-12	1.7896
CLEC4F	1.79584	0.000396192	1.79584
THSD7A	-1.80247	1.21e-05	1.80247
CSRP2	-1.80386	3.8e-05	1.80386
LPPR3	-1.80659	0.000217206	1.80659
PRAME	-1.80755	0.021496	1.80755
MET	-1.814	1.05e-16	1.814
NFAM1	1.8165	0.0118796	1.8165
IL1R1	-1.818	2.96e-20	1.818
KCNF1	1.82076	5.72e-08	1.82076
ZNF540	1.82174	0.0334165	1.82174
NYNRIN	-1.82341	2.09e-09	1.82341
SLC6A20	1.82416	7.07e-05	1.82416
GALNT5	-1.8332	0.00701716	1.8332
ZNF365	1.83334	8.45e-07	1.83334
HPN	1.83579	0.0337633	1.83579
SYNM	-1.84385	1.17e-34	1.84385
PKD1L1	-1.84447	0.00224577	1.84447
TRIM31	1.84764	0.0321472	1.84764
IL18	1.84791	5.39e-05	1.84791
FAXDC2	1.84979	1.34e-07	1.84979
LUZP2	-1.8541	1.47e-13	1.8541
FRMD5	1.85474	4.53e-07	1.85474
ACPP	-1.85641	0.000206527	1.85641
AMBP	-1.86578	0.00318081	1.86578
LRP2	1.86582	1.7e-27	1.86582
IFI6	-1.87989	2.12e-08	1.87989
FAM65B	1.88098	0.000985	1.88098
MIR205HG	-1.88136	1.19e-05	1.88136
MITF	1.89231	8.61e-09	1.89231
ITGAL	-1.89369	0.00201542	1.89369
PCDHB10	1.89471	0.00373571	1.89471
EFEMP1	-1.90091	3.9e-111	1.90091
PRDM16	-1.9011	0.00282164	1.9011
MAP1B	1.90127	1.46e-14	1.90127
IFITM1	-1.90314	1.23e-07	1.90314
UPK3A	-1.90477	0.0275814	1.90477
HOXB2	1.90537	7.14e-10	1.90537
RBM24	1.90568	3.38e-05	1.90568
NMB	-1.9057	7.49e-16	1.9057
MYO1G	1.90741	0.00270164	1.90741
RBMS2	-1.91064	5.75e-37	1.91064
NCF2	1.9115	0.0212547	1.9115
C2orf54	-1.92441	3.94e-08	1.92441
ADCY7	-1.93329	0.000221007	1.93329
NDST4	-1.93843	0.00323536	1.93843
LRP2BP	1.94038	2.33e-10	1.94038
C14orf132	1.94296	6.03e-55	1.94296
PCDHAC1	1.94321	3.49e-10	1.94321
ITGA2	1.9468	3.6e-22	1.9468
SVOPL	-1.9498	2.05e-05	1.9498
MUC5B	1.95255	8.37e-78	1.95255
HPSE	-1.95372	0.0165214	1.95372
CD22	1.9549	0.0497374	1.9549
TCF7	1.95761	7.62e-06	1.95761
XAF1	-1.96434	0.0180357	1.96434
TIAM1	1.96582	2.02e-111	1.96582
EBF4	-1.96887	4.11e-25	1.96887
WNT8B	1.98343	6.45e-05	1.98343
TAS1R3	1.98833	4.27e-09	1.98833
C11orf96	1.99134	0.0145989	1.99134
CEP126	1.99165	1.9e-08	1.99165
ADGRL2	-1.9926	1.21e-18	1.9926
HS3ST3B1	2.00176	0.0316474	2.00176
C1S	2.01061	4.29e-15	2.01061
RAB34	-2.01101	0.0393767	2.01101
ZG16	-2.01324	0.0067062	2.01324
SLITRK6	2.01328	2.74e-06	2.01328
B3GNT3	-2.01422	4.6e-09	2.01422
BACE2	-2.01573	3.81e-61	2.01573
C8orf31	-2.01873	0.0364469	2.01873
DHX58	-2.02532	7.26e-05	2.02532
KRT17	-2.02706	6.83e-14	2.02706
KIAA1024	-2.03311	2.74e-05	2.03311
PLCXD2	2.03324	0.00711945	2.03324
ALDH1A3	-2.03378	1.07e-12	2.03378
SCARA5	-2.0369	1.09e-06	2.0369
ADAMTS15	2.03756	1.78e-17	2.03756
ST6GAL1	-2.03972	2.77e-17	2.03972
DAAM2	-2.03995	9.21e-19	2.03995
MME	-2.0479	0.000674311	2.0479
ACOX2	-2.05423	9.68e-09	2.05423
ZNF441	-2.05848	0.0471066	2.05848
CNN2	-2.05908	1.16e-52	2.05908
ADAMTSL3	-2.06823	2.01e-08	2.06823
ISM1	-2.07305	0.000317479	2.07305
OR8A1	2.0773	0.0229333	2.0773
RELB	-2.08834	2.81e-13	2.08834
DDIT4	2.09473	2.87e-17	2.09473
TMPRSS11E	-2.09591	0.0346077	2.09591
KLHL13	-2.0967	1.45e-08	2.0967
RHBG	-2.09971	1.54e-08	2.09971
TENM3	-2.10397	9.74e-28	2.10397
PLAC8	-2.11001	0.0313585	2.11001
CACNA1C	2.11515	0.0365488	2.11515
HOXC5	-2.12073	2.88e-05	2.12073
PADI3	-2.12098	0.000121985	2.12098
DKK1	-2.12218	1.26e-21	2.12218
TRIP6	-2.13239	1.55e-18	2.13239
PCDHGB7	2.13295	0.0150782	2.13295
CMPK2	-2.1335	0.000295875	2.1335
LCN2	2.137	0.00360168	2.137
B4GALNT2	-2.13702	1.53e-19	2.13702
FER1L6	2.139	0.0370097	2.139
HAAO	-2.14134	0.0264638	2.14134
KCNG3	-2.14799	0.00256104	2.14799
LRG1	-2.14819	0.000388121	2.14819
TNFAIP3	-2.14838	3.51e-05	2.14838
EPHA7	-2.15584	0.00848857	2.15584
EFHD1	-2.16507	1.24e-56	2.16507
KIAA1456	-2.16514	0.012011	2.16514
SOX2	-2.17531	2.96e-11	2.17531
SLC25A27	2.18059	0.00564573	2.18059
NTN4	-2.18145	1.31e-29	2.18145
LAMC3	2.1843	0.032767	2.1843
SHISA2	-2.18497	1.19e-39	2.18497
COL14A1	-2.19478	0.000399148	2.19478
PLAU	-2.19791	1.44e-23	2.19791
AXL	-2.20162	0.000523744	2.20162
AQP3	-2.20163	1.61e-16	2.20163
KIF7	-2.20729	1.1e-38	2.20729
ANXA1	-2.20975	0.00114466	2.20975
MUC3A	-2.21008	0.000431258	2.21008
CPS1	-2.21189	6.4e-24	2.21189
TMEM74B	2.2131	0.0475098	2.2131
CHRNB4	-2.21448	0.0108017	2.21448
DNAJC12	2.21453	2.37e-67	2.21453
A4GALT	2.21774	1.22e-16	2.21774
NPPC	-2.21826	0.00488029	2.21826
IKBKE	-2.22214	1.69e-45	2.22214
IGF1R	-2.23972	2.61e-10	2.23972
DDIT4L	-2.25279	0.0441567	2.25279
SYN1	-2.25543	0.00165902	2.25543
ATG9B	2.25747	0.00260531	2.25747
GPR158	-2.25849	7.47e-17	2.25849
CITED1	2.2662	4.38e-08	2.2662
DUSP13	2.26865	1.98e-16	2.26865
COL5A1	-2.27394	4.75e-36	2.27394
PTPRT	-2.27891	0.0149241	2.27891
DRP2	-2.27923	0.0219303	2.27923
CCR1	-2.27969	6.48e-05	2.27969
B3GALT5	2.28073	5.11e-11	2.28073
ASPRV1	-2.29206	0.0171338	2.29206
PCDHB15	2.30046	6.33e-05	2.30046
CCDC71L	-2.30207	2.67e-13	2.30207
CYP4F3	2.30608	0.0333975	2.30608
FSTL4	2.31928	8.45e-07	2.31928
FN1	-2.32182	3.72e-49	2.32182
HOPX	-2.33796	1.01e-07	2.33796
CRB2	-2.34047	0.014077	2.34047
CFAP54	-2.34137	0.00987414	2.34137
ACSM3	-2.35542	0.0335072	2.35542
EXTL1	-2.35769	0.000236663	2.35769
CXorf57	-2.36454	9.13e-09	2.36454
ATOH8	-2.368	0.0234591	2.368
MEIS1	2.37783	1.21e-05	2.37783
TRIM38	-2.38143	1.42e-05	2.38143
UBA7	-2.38433	1.87e-08	2.38433
ZC3H12C	-2.39569	1.08e-07	2.39569
TENM4	-2.39794	4.83e-13	2.39794
DQX1	-2.3991	0.00138927	2.3991
RASGRP3	-2.40123	0.0130563	2.40123
SYBU	2.40322	9.59e-46	2.40322
TMEM45A	-2.40424	1.79e-09	2.40424
PCP4	-2.40582	4.25e-06	2.40582
NRXN3	2.40924	3.76e-12	2.40924
CCDC80	-2.41185	0.00045603	2.41185
KLHDC8A	2.43197	0.00239291	2.43197
MAPK4	2.43789	4.79e-25	2.43789
TIMP4	2.44253	0.0103696	2.44253
AOC1	2.44606	1.67e-13	2.44606
KCNJ4	-2.45794	0.00122608	2.45794
ZDHHC22	2.45882	6.43e-05	2.45882
DLK1	-2.45943	0.0170566	2.45943
ELOVL2	-2.4653	2.04e-07	2.4653
ALDH1L1	-2.46556	0.00138651	2.46556
PID1	-2.48373	0.000151427	2.48373
LRRN4	-2.49118	0.0340105	2.49118
ABCG2	-2.50479	1.58e-50	2.50479
ATRNL1	2.51039	3.86e-05	2.51039
SLIT1	2.51769	1.14e-81	2.51769
H3F3A	-2.52839	0.0369483	2.52839
PRRG1	2.53096	3.02e-11	2.53096
FAM167A	-2.53351	2.25e-13	2.53351
NECAB1	-2.54412	0.00312708	2.54412
ACTG2	-2.54827	0.00765762	2.54827
CFH	-2.57369	0.0199443	2.57369
ATP6V0A4	-2.59556	1.32e-12	2.59556
C16orf89	2.60874	0.00573682	2.60874
CFHR3	-2.61123	0.00668218	2.61123
MUM1L1	-2.61367	2.44e-10	2.61367
NOS3	2.62832	2.36e-06	2.62832
SLC16A11	-2.63111	0.0445971	2.63111
TSPAN12	-2.63174	2.68e-23	2.63174
TBXA2R	-2.63478	0.017708	2.63478
GDPD1	2.64069	2.74e-30	2.64069
RGS2	-2.64669	0.0113662	2.64669
TM4SF4	-2.64886	0.0429203	2.64886
TRAM1L1	-2.65023	3.05e-13	2.65023
WNT10B	-2.66806	3.14e-18	2.66806
TIMP3	-2.67508	1.14e-66	2.67508
LRTM2	-2.70319	3.03e-06	2.70319
BAGE	2.70566	6.8e-06	2.70566
LVRN	-2.71325	0.010898	2.71325
SH3BGRL	2.71543	5.4e-87	2.71543
GALC	-2.71592	2.61e-06	2.71592
ASIC4	2.71849	0.0213538	2.71849
APOL3	-2.74257	4.64e-16	2.74257
MCHR1	-2.7459	0.00727718	2.7459
RASGEF1A	2.75166	1.75e-28	2.75166
SPERT	-2.75897	0.0162576	2.75897
SYNPO2	2.78465	1.99e-37	2.78465
PGC	2.79198	0.0373559	2.79198
RTP4	-2.79934	0.0057205	2.79934
PDE11A	-2.80036	0.00703559	2.80036
LRRC15	2.81045	3.04e-22	2.81045
SLC1A3	-2.84168	0.0268898	2.84168
KCNG1	-2.85645	1.98e-16	2.85645
CLDN1	-2.86615	1.58e-20	2.86615
FLT3	-2.88086	3.2e-07	2.88086
HMGN5	2.89849	6.76e-15	2.89849
SLA2	2.91674	0.00442098	2.91674
ITGA2B	-2.93631	2e-05	2.93631
GPX8	-2.94922	4.25e-05	2.94922
SLC13A2	2.95963	0.0174405	2.95963
SLC5A5	-2.96523	0.00703559	2.96523
HOXD8	-2.9831	7.91e-05	2.9831
THBS4	-2.99333	0.0364469	2.99333
NAV3	2.9941	7.71e-05	2.9941
PCDHA8	3.00896	0.00357194	3.00896
FST	-3.01298	0.0286335	3.01298
PHOSPHO1	-3.01977	0.000491969	3.01977
SECTM1	-3.05748	4.1e-15	3.05748
LURAP1	3.07259	1.65e-05	3.07259
SPATC1L	3.08796	0.000154145	3.08796
TGFB2	-3.10261	1.29e-22	3.10261
PKDCC	3.14558	0.00155797	3.14558
UNC13A	-3.16474	5.15e-08	3.16474
FAM135A	-3.16509	0.000369898	3.16509
AMTN	-3.1702	6.33e-09	3.1702
PDLIM3	-3.17427	0.0368707	3.17427
IBSP	-3.18009	0.032767	3.18009
RCN3	-3.19676	0.00341053	3.19676
PLSCR4	-3.21162	0.000356215	3.21162
THRSP	3.21597	5.8e-15	3.21597
DAB2	-3.22353	0.0133131	3.22353
PDE4B	-3.22461	3.21e-16	3.22461
CA9	-3.2509	0.0313169	3.2509
AGTR1	3.26011	8.4e-10	3.26011
IGSF23	-3.27795	0.00309316	3.27795
ARL4D	-3.28909	7.44e-56	3.28909
TACR3	-3.29573	5.48e-05	3.29573
CSTA	-3.30478	3.42e-10	3.30478
DIRAS2	3.30766	1.09e-05	3.30766
CADM2	-3.31406	0.0350994	3.31406
KRT14	3.3217	1.27e-14	3.3217
PSMB9	-3.36624	3.9e-19	3.36624
GPR139	-3.4017	0.0122223	3.4017
GNAI1	3.40809	0.0306535	3.40809
NCALD	-3.41231	5.49e-13	3.41231
ITGAX	3.45788	0.00374718	3.45788
PABPC4L	-3.46353	0.000246135	3.46353
EDIL3	-3.46831	1.32e-11	3.46831
GABRB2	-3.48143	5.82e-16	3.48143
ARHGAP24	-3.48482	0.030661	3.48482
PRKAA2	-3.48791	6.31e-16	3.48791
SPINK4	3.48838	0.000532186	3.48838
PI15	-3.49254	0.0297019	3.49254
BACH2	-3.50149	1.08e-09	3.50149
ZNF727	-3.5233	0.00704988	3.5233
RNF225	-3.52697	0.0329212	3.52697
GRIA2	-3.57005	2.78e-08	3.57005
FAM49A	-3.6074	0.0168924	3.6074
SHC2	-3.64815	0.0174451	3.64815
ADCY5	3.64879	1.52e-174	3.64879
PQLC2L	-3.65029	0.0178998	3.65029
ARHGDIB	-3.65226	4.03e-15	3.65226
NCMAP	3.66066	5.54e-13	3.66066
ANKRD45	-3.68004	0.0373473	3.68004
FABP6	3.68947	0.031929	3.68947
ZFP28	3.69029	0.0245756	3.69029
PARM1	3.70413	0.023457	3.70413
PLEKHS1	-3.75898	4.46e-52	3.75898
C5AR2	3.77141	0.00270386	3.77141
TNFRSF19	-3.77717	5.32e-17	3.77717
CPNE9	3.7892	0.033462	3.7892
ZNF300	-3.79812	0.0249842	3.79812
HOXD1	-3.79937	0.0358384	3.79937
CRISP3	-3.80207	8.39e-86	3.80207
THEMIS2	-3.81592	0.0254561	3.81592
GJA5	-3.86129	0.0428933	3.86129
RNF182	-3.86287	0.0381636	3.86287
ZCCHC12	3.86756	0.0225288	3.86756
ALDH3A1	-3.89354	0.0335538	3.89354
ATCAY	3.89805	0.0421035	3.89805
PRR18	3.90454	0.0292727	3.90454
IFI27	-3.9471	0.00289234	3.9471
B3GALT4	3.94798	0.0130001	3.94798
WDR72	3.96012	0.0137785	3.96012
SLC6A14	3.96385	0.0201208	3.96385
MAG	4.00574	0.0178118	4.00574
FCGRT	-4.02596	0.00625104	4.02596
CNTNAP3	4.03248	0.0274157	4.03248
IL32	-4.03265	0.00129021	4.03265
VGLL1	-4.03986	1.21e-06	4.03986
ZMAT4	-4.05518	3.8e-08	4.05518
CSF2RB	-4.07346	0.00642962	4.07346
PCDHA10	4.10361	9.67e-13	4.10361
C10orf107	-4.14187	0.0160023	4.14187
NR2E3	-4.14621	0.00584094	4.14621
CFL2	-4.17201	2.6e-34	4.17201
FAM13C	4.18602	1.05e-05	4.18602
WDR86	-4.18643	0.0404563	4.18643
S100A8	-4.19569	1.25e-07	4.19569
ITGA9	-4.23207	0.00518404	4.23207
CLDN16	-4.26313	0.0130001	4.26313
IFI44	-4.28017	2.97e-23	4.28017
SPINK8	-4.30316	0.00444185	4.30316
ZIC3	-4.30351	1.07e-15	4.30351
CALD1	-4.32537	0.00304489	4.32537
PABPC5	-4.34645	0.0144218	4.34645
ITGAM	-4.35486	4.63e-06	4.35486
VIPR2	-4.36115	0.00894834	4.36115
KLK5	4.36186	0.040619	4.36186
CCDC184	4.36765	0.0254561	4.36765
FHL1	4.40362	0.00956459	4.40362
AFF2	-4.41493	0.000539133	4.41493
MSRB3	-4.43704	2.71e-07	4.43704
OLFML2B	4.44495	0.0473559	4.44495
TTLL9	4.45861	0.000419272	4.45861
IL2RB	4.46458	0.000449093	4.46458
STMN4	4.47274	0.000649748	4.47274
PDE1C	4.4875	0.0125838	4.4875
IFI35	-4.55658	1.61e-23	4.55658
STK32B	-4.56792	0.00138515	4.56792
CNN3	-4.57228	0.00121049	4.57228
PLS3	-4.57688	0.00127769	4.57688
SNCAIP	-4.60488	0.00314359	4.60488
UGT2B15	-4.6234	0.00170109	4.6234
SLITRK1	-4.62595	0.0237067	4.62595
FHIT	-4.64259	0.00163581	4.64259
SESN3	4.64687	4.56e-12	4.64687
SSTR3	4.65403	5.48e-08	4.65403
KIAA1210	4.68925	2.69e-05	4.68925
PRICKLE1	-4.70821	2.29e-20	4.70821
HLX	-4.72065	0.0010661	4.72065
RNF128	-4.77264	0.000852799	4.77264
KL	-4.79825	2.6e-70	4.79825
PCDHA9	4.81199	0.00437248	4.81199
TSPAN18	-4.8336	0.00371325	4.8336
IGFL1	-4.86339	0.0158419	4.86339
EPHA6	-4.86582	0.00127956	4.86582
CDH8	4.88008	0.00519867	4.88008
DLGAP1	-4.89109	0.00646475	4.89109
LRFN5	-4.94316	0.0164807	4.94316
LTB	-4.99005	0.000112195	4.99005
LPAR1	-5.02428	0.000283399	5.02428
MOBP	5.02433	0.0168651	5.02433
GP2	-5.08154	0.00037651	5.08154
FOXI1	-5.17994	0.00720901	5.17994
GPRIN3	-5.19543	1.69e-36	5.19543
EPHA3	-5.22011	0.00136451	5.22011
S100A9	-5.24401	0.000147076	5.24401
ARL11	-5.28703	0.000151614	5.28703
SNAP25	-5.29184	0.0232207	5.29184
IGSF1	-5.36668	8.82e-05	5.36668
PDE1A	-5.39455	0.000301236	5.39455
SLITRK5	-5.41842	9.15e-05	5.41842
DIO2	-5.45816	8.45e-05	5.45816
AKR1D1	-5.46016	0.0127558	5.46016
GLI1	-5.46975	0.00047631	5.46975
SERPING1	-5.50796	9.61e-05	5.50796
CTSS	-5.54161	0.000121985	5.54161
GPNMB	5.54932	1.49e-46	5.54932
FAM71C	5.60606	0.00349657	5.60606
TSPAN2	-5.67934	0.0001666	5.67934
CDCP1	5.69695	3.46e-05	5.69695
CCRL2	-5.70436	0.000659215	5.70436
ZNF385B	-5.7907	4.45e-07	5.7907
GLYATL1	-5.82584	0.00334021	5.82584
ZKSCAN7	-5.86525	0.000115827	5.86525
IRAK2	-5.97367	2.21e-05	5.97367
CTNNA3	-5.98339	1.34e-14	5.98339
HIST1H1T	6.08786	0.00042191	6.08786
IFI44L	-6.24831	2.54e-17	6.24831
ADD2	6.3704	9.5e-05	6.3704
SLC27A6	-6.3776	6.02e-08	6.3776
PLXDC2	-6.44682	4.04e-86	6.44682
LONRF3	6.46403	0.0113953	6.46403
MDGA2	-6.58284	9.89e-09	6.58284
GPC5	-7.2125	1.85e-05	7.2125
FBN2	-7.35317	5.15e-08	7.35317
CD33	7.36789	7.92e-07	7.36789
ENOX1	-7.48484	1.5e-08	7.48484
MALRD1	-8.12275	2.87e-10	8.12275
MAML2	-8.33498	1.04e-10	8.33498
BRINP3	-8.49092	3.7e-11	8.49092
PCDH10	-10.9282	1.57e-47	10.9282
PCDH7	-12.5541	6.7e-24	12.5541
NID1	12.8993	0.00119827	12.8993
