# Supplementary material for: A tumor-agnostic, topology-informed scoring framework for drug repurposing: application to CDK4/6 inhibitor resistance in HR+ breast cancer
Source: Research Square preprint supplement (doi:10.21203/rs.3.rs-6447930/v1), 2025-05-06
Supplement: Supplementary file 2 [file 432a5dd0c90a5db75a4026a8.xlsx]

## Sheet: Sheet 1
gene_name
