# Supplementary material for: A tumor-agnostic, topology-informed scoring framework for drug repurposing: application to CDK4/6 inhibitor resistance in HR+ breast cancer
Source: Research Square preprint supplement (doi:10.21203/rs.3.rs-6447930/v1), 2025-05-06
Supplement: Supplementary file 8 [file 75aba8f047d74fcbab49f784.xlsx]

## Sheet: Sheet1
Gene	log2FoldChange	padj	absLogFC
NAT2	2.76773	0.0250666	2.76773
ACVRL1	2.90341	0.0466823	2.90341
ADRB2	2.97142	0.00628794	2.97142
ASS1	2.04036	1.37e-188	2.04036
COL4A3	1.44088	0.0201141	1.44088
COL4A4	1.24107	0.0141458	1.24107
DMD	1.20392	5.08e-06	1.20392
SLC26A3	3.02345	1.39e-07	3.02345
EDNRB	1.39104	1.84e-08	1.39104
ENG	1.00852	3.98e-38	1.00852
FBN1	1.19807	0.00653483	1.19807
FGFR2	-1.22978	2.58e-88	1.22978
GJA1	2.2804	7.92e-36	2.2804
GLDC	1.01825	3.34e-62	1.01825
CFH	3.98843	0.0024647	3.98843
JAG1	-1.4809	0	1.4809
JAK3	1.07106	3.34e-23	1.07106
LAMB3	2.10046	1.3e-09	2.10046
LIPA	1.19688	1.02e-13	1.19688
MYO7A	1.4154	6.76e-05	1.4154
NDP	-2.41588	0.000223628	2.41588
SLC12A1	1.09534	0.0210288	1.09534
SRD5A2	1.34541	0.000748157	1.34541
STS	1.4309	5.93e-14	1.4309
ABCC8	3.80247	3.31e-08	3.80247
TAT	3.74031	8e-59	3.74031
CYBB	1.78717	0.000296546	1.78717
KRT17	1.94696	0.00811485	1.94696
NEU1	1.18045	4.26e-07	1.18045
OXCT1	2.50143	2.14e-07	2.50143
SLC26A4	1.48972	0.00210152	1.48972
TWIST1	2.81713	1.9e-61	2.81713
AQP2	-2.74235	0.0242694	2.74235
TNF	4.84723	0.00024517	4.84723
IGFBP3	-1.21733	0.000574094	1.21733
IGFBP5	-1.50825	4.25e-235	1.50825
CXCL12	2.57758	4.65e-222	2.57758
CD4	1.32867	0.000680602	1.32867
SERPINA5	1.41584	3.95e-07	1.41584
CXCR1	3.92829	0.000334042	3.92829
ADORA1	2.04256	0.00023458	2.04256
ADRA2A	1.8598	1.05e-18	1.8598
ANXA1	1.07285	1.62e-05	1.07285
CACNA1B	1.39829	7.18e-07	1.39829
CACNB1	1.13753	3.84e-06	1.13753
CHRM4	-2.52201	2.48e-12	2.52201
CYP2J2	1.01418	4.73e-11	1.01418
ACE	1.54597	0.000385605	1.54597
DIO1	-2.45303	0.00101654	2.45303
DIO2	2.99041	1.26e-20	2.99041
DRD1	1.34055	0.0140956	1.34055
GABRG2	1.28684	1.26e-20	1.28684
GRIA2	-1.0767	0.00644304	1.0767
GRIK3	2.14392	7.7e-185	2.14392
GRIN2C	-1.01053	8.54e-12	1.01053
HTR1D	1.43056	8.38e-05	1.43056
MAOB	-1.12187	1.59e-08	1.12187
NPY1R	1.897	1.04e-71	1.897
OXTR	1.0038	3.84e-12	1.0038
PON3	1.29508	2.32e-34	1.29508
CYP27C1	-1.36695	0.00163591	1.36695
C14orf37	1.68684	0.00162941	1.68684
VCX3B	1.74468	0.0321543	1.74468
ASTL	1.20338	4.11e-06	1.20338
FCRLB	1.89507	3.65e-07	1.89507
CACNA1I	1.08189	1.13e-29	1.08189
C1orf168	1.10224	2.14e-05	1.10224
FGFRL1	1.08011	1.11e-102	1.08011
LINGO4	1.85176	0.00225712	1.85176
ANKRD34B	-1.00727	0.0315237	1.00727
ST8SIA6	1.14462	9.31e-22	1.14462
GPNMB	2.92046	4.13e-16	2.92046
HCST	1.00192	0.0437267	1.00192
CDHR4	1.53903	1.03e-20	1.53903
C1QL4	-1.18448	2.43e-40	1.18448
SLC7A2	4.43117	4.16e-40	4.43117
C6orf1	1.11801	3.8e-24	1.11801
SHE	2.0353	4.19e-05	2.0353
CLPSL1	2.44851	2.65e-31	2.44851
GLYATL3	-4.88006	1.76e-29	4.88006
NCMAP	-1.06962	0.00443559	1.06962
SLC9A4	1.57237	0.017558	1.57237
XKR7	1.29963	0.0411976	1.29963
NHSL2	1.70535	0.000796049	1.70535
CCDC184	1.61404	3.41e-05	1.61404
PLIN5	1.62851	5.43e-38	1.62851
FAM47C	-1.26639	0.00337594	1.26639
RUNX2	2.96884	2.2e-36	2.96884
C2orf76	1.20287	0.00205982	1.20287
FAM78B	1.59783	0.00310053	1.59783
FRMPD2	-1.26639	0.00696325	1.26639
RGAG4	1.15789	1.49e-23	1.15789
CLLU1OS	-1.49041	0.0254206	1.49041
ARHGAP24	-2.68392	4.57e-05	2.68392
PDE8B	-1.3521	2.67e-09	1.3521
OAS1	1.92922	4.57e-20	1.92922
MYCL	-1.14265	8.41e-09	1.14265
MTUS2	1.98636	0.00113202	1.98636
SMOC1	1.96854	0.046202	1.96854
RYR2	2.91677	6.24e-06	2.91677
SCD5	-1.5001	2.43e-40	1.5001
SCNN1G	1.96174	2.69e-18	1.96174
LRTM2	1.68553	0.000139154	1.68553
AIM1L	1.47814	5.72e-16	1.47814
CD53	2.77456	2.07e-05	2.77456
TGFB1I1	-2.11946	2.2e-05	2.11946
RYR1	1.08611	1.77e-16	1.08611
MUC1	2.32019	1.26e-55	2.32019
SSTR2	1.56063	6.42e-06	1.56063
PDE11A	1.49228	0.0246497	1.49228
TMEM231	1.46854	6.94e-94	1.46854
KLK10	1.21909	1.06e-06	1.21909
EXOC3L4	1.79093	0.00124756	1.79093
TMEM52B	-1.73298	8.1e-11	1.73298
RASA4	1.0408	0.0108729	1.0408
FAM155A	3.88377	3.28e-36	3.88377
ZNF99	1.76712	0.00407316	1.76712
UNC13A	1.97703	1.4e-11	1.97703
CCDC85A	3.5485	2.93e-16	3.5485
IGSF5	1.14602	0.00245803	1.14602
EPHA6	2.53508	6.17e-07	2.53508
BTBD17	2.085	0.00597936	2.085
PEAR1	3.19526	1.09e-12	3.19526
GAB3	2.6099	0.00525571	2.6099
DDC	4.07567	0.0116458	4.07567
SERPINA3	1.38598	6.04e-64	1.38598
FUT3	1.35055	0.0286559	1.35055
HLA-F	1.32058	1.46e-10	1.32058
SGSM1	-1.18782	1.16e-30	1.18782
SFTPA2	2.05785	0.000709816	2.05785
NIPAL4	1.74874	1.25e-57	1.74874
SH3RF3	-1.3917	1.3e-24	1.3917
EIF4E1B	-2.17746	6.75e-10	2.17746
JAKMIP1	1.67224	9.68e-09	1.67224
SYBU	-1.06365	1.34e-68	1.06365
POTEF	2.73903	0.0207465	2.73903
SERPINA10	-2.30943	0.0137381	2.30943
FAM183A	-1.27236	7.04e-26	1.27236
PCP4L1	1.78676	0.00175375	1.78676
COL6A6	-2.62358	0.0125671	2.62358
C2orf70	-1.37576	0.0129056	1.37576
NAV2	2.03767	5.58e-09	2.03767
SCIN	2.14177	5.42e-44	2.14177
SLC8A1	-2.12063	0.0125765	2.12063
TTC22	3.09377	0.0167303	3.09377
SYNPO2L	1.38738	0.000196514	1.38738
CPS1	-1.31319	8.88e-05	1.31319
FAM178B	1.89557	2.88e-07	1.89557
TENM2	1.08771	7.35e-66	1.08771
SERPINI1	1.76517	2.42e-45	1.76517
SLC6A12	1.75472	8.86e-08	1.75472
FAM189A2	5.05565	0.00202238	5.05565
FBP1	1.61961	1.59e-29	1.61961
SPINK5	-2.11658	0.000355413	2.11658
SERPINA1	1.0414	3.5e-19	1.0414
CHST8	2.77414	1.26e-06	2.77414
SULF1	-3.4998	2.86e-11	3.4998
FSTL5	-2.14002	0.00185136	2.14002
CSAG3	2.42599	0.000637038	2.42599
RELL2	1.35574	1.06e-46	1.35574
LEF1	-1.37264	7.64e-25	1.37264
ESRRG	2.11296	2.5e-07	2.11296
RBM20	2.75786	3.39e-22	2.75786
LRRC15	2.54814	1.98e-05	2.54814
TGFB2	-1.6702	2.07e-71	1.6702
SSPN	1.20523	2e-24	1.20523
C2CD4C	-1.59166	1.13e-46	1.59166
C11orf86	-1.67095	0.000939869	1.67095
DCAF8L2	2.25668	0.00228931	2.25668
ZNF860	1.39231	2.6e-17	1.39231
FGF13	1.84124	4.57e-30	1.84124
ALOX15	1.65284	2.3e-42	1.65284
C9orf47	1.15022	0.00033704	1.15022
P4HA2	1.27771	4.13e-60	1.27771
ACOXL	-2.31856	0.00992028	2.31856
PHOSPHO1	1.24612	0.00151812	1.24612
MAPRE2	1.43488	1.39e-05	1.43488
RPH3A	3.32034	0.001204	3.32034
CAPN8	1.00828	2.84e-05	1.00828
TLE6	1.64068	2.21e-20	1.64068
ELAVL4	1.67523	0.00251154	1.67523
CITED1	3.79303	3.31e-15	3.79303
SLCO3A1	-1.29225	1.5e-74	1.29225
FIBCD1	1.15164	5.69e-26	1.15164
PATL2	1.0037	0.000660966	1.0037
CAPN14	1.21894	3.92e-07	1.21894
C12orf75	1.24175	1.17e-174	1.24175
SHISA9	-1.71976	1.82e-17	1.71976
CDK6	1.25182	7.93e-20	1.25182
MPPED2	-2.16221	3.35e-11	2.16221
C6orf141	-1.04302	4.66e-93	1.04302
KPNA7	3.43525	6.28e-05	3.43525
CDC20B	1.0113	6.84e-77	1.0113
SLC15A2	1.69377	2.84e-12	1.69377
AVPR2	1.51299	0.0204401	1.51299
FAM25A	2.11373	3.03e-12	2.11373
HRASLS5	3.13885	0.0449318	3.13885
B4GALNT2	1.24406	4.19e-25	1.24406
P2RX6	1.04773	2.65e-07	1.04773
GLI1	2.81667	0.00661764	2.81667
KCNQ5	-1.81516	1.13e-09	1.81516
PTPRH	1.68787	1.18e-08	1.68787
MYB	1.0681	5.06e-115	1.0681
SULF2	1.52142	1.64e-177	1.52142
KIAA0040	1.28524	3.97e-153	1.28524
APBA1	1.89356	0.0016101	1.89356
CECR6	1.16763	2.01e-05	1.16763
PCYT1B	1.402	8.37e-09	1.402
PRR29	-1.37153	1.09e-64	1.37153
TLCD2	1.05127	6.36e-15	1.05127
ARHGAP40	2.14899	6.89e-41	2.14899
ANKRD33B	-2.02283	0.00425283	2.02283
RAB7B	2.96297	3.74e-12	2.96297
CALCR	1.49058	7.18e-05	1.49058
BIRC3	1.06785	0.0164236	1.06785
SBSN	3.31917	0.0187283	3.31917
CADM2	1.4661	0.0135199	1.4661
TFEB	1.76659	2.86e-39	1.76659
TMEM92	1.0521	2.28e-10	1.0521
KIAA0319	1.19536	1.86e-26	1.19536
SCUBE2	1.19255	4.67e-11	1.19255
PPP1R32	-1.26242	5.47e-82	1.26242
CX3CR1	1.48686	6.65e-08	1.48686
ITM2A	1.55559	1.37e-06	1.55559
IL16	-1.21027	2.46e-10	1.21027
AMPD3	2.33744	2.19e-09	2.33744
OLR1	-1.98017	4.1e-24	1.98017
PCDH7	-2.61491	1.16e-139	2.61491
PRRT4	1.65024	2.4e-06	1.65024
SLC16A6	2.01797	1.03e-118	2.01797
ARHGDIB	1.36888	3.56e-09	1.36888
HABP2	-2.4152	0.0020579	2.4152
ZC4H2	-3.50001	9.87e-18	3.50001
CPXM1	-1.1156	0.00218717	1.1156
TCN2	2.33695	0.0220074	2.33695
NOX5	1.34394	0.0170958	1.34394
CEACAM1	1.64883	1.29e-13	1.64883
C11orf97	3.45059	3.84e-09	3.45059
MCIDAS	-1.02374	4.97e-25	1.02374
MGP	2.03876	4.72e-86	2.03876
ERVV-2	3.1842	1.26e-17	3.1842
PLEKHS1	-1.11199	5.13e-09	1.11199
NRCAM	4.00557	4.28e-17	4.00557
TGFBR3L	1.17638	9.76e-11	1.17638
TMEM178B	3.08379	0.00325783	3.08379
TPBGL	3.33489	0.0236981	3.33489
LIPF	-1.44378	0.0334456	1.44378
EPPIN-WFDC6	2.12248	1.5e-09	2.12248
ZBBX	-2.16333	6.19e-19	2.16333
CYP4F3	2.20128	0.00336749	2.20128
CRABP2	1.07598	2.64e-36	1.07598
SPRR1A	1.51633	0.0286763	1.51633
ROPN1L	-1.47276	1.23e-14	1.47276
ATP6V1G2	-1.05172	3e-08	1.05172
HDAC9	1.74485	0.0170495	1.74485
NPR3	-1.52692	1.93e-171	1.52692
IGSF8	1.01959	4.56e-31	1.01959
ABHD12B	3.41048	5.64e-05	3.41048
UGT2B28	2.0421	0.0488598	2.0421
CA11	1.0995	9.17e-69	1.0995
CCNE1	1.10656	0.000583251	1.10656
HLA-DPA1	1.30953	0.00733611	1.30953
ARHGEF38	-1.0018	1.6e-08	1.0018
SLC22A31	2.8088	8.04e-10	2.8088
HLA-C	1.14977	2.46e-07	1.14977
IL5RA	-1.26639	6.1e-08	1.26639
PIM1	-1.0517	0.0375262	1.0517
PVRL3	1.5789	0.000111266	1.5789
RAET1E	-1.79939	7.14e-05	1.79939
LOC388849	1.56141	2.78e-09	1.56141
CDON	-1.44341	0.0220178	1.44341
LMO3	1.4461	3.83e-05	1.4461
STAT4	1.05088	1.89e-08	1.05088
HLA-DQB1	1.32276	3.25e-06	1.32276
HLA-DRB1	1.03051	3.92e-08	1.03051
FRMD3	1.3964	4.43e-08	1.3964
ENTPD3	1.7239	0.000294672	1.7239
VIPR1	1.21441	1.78e-18	1.21441
CLPS	2.47994	8.27e-07	2.47994
SMIM22	1.15174	5.76e-08	1.15174
DGAT2	1.85607	1.7e-46	1.85607
AKR1C3	1.58823	1.44e-12	1.58823
NABP1	1.1938	5.44e-17	1.1938
COLEC11	1.2216	0.0369132	1.2216
ATP1A3	1.6816	1.52e-36	1.6816
HPGD	2.00708	2.14e-05	2.00708
C12orf79	-1.47781	7.7e-10	1.47781
CMPK2	1.43267	3.19e-09	1.43267
SLC39A2	1.93786	0.00362191	1.93786
GLMP	1.03897	0.000347742	1.03897
CDH13	1.24635	1.06e-11	1.24635
CLCNKA	2.60581	3.97e-08	2.60581
IKZF3	1.15332	5.9e-11	1.15332
TSKU	1.44526	9.14e-57	1.44526
ZNF501	-4.62062	0.000275042	4.62062
PGBD5	1.5789	0.00113337	1.5789
PDE1A	3.33338	0.00592413	3.33338
HAL	-1.70293	0.00150765	1.70293
PAX6	-1.10446	1.98e-11	1.10446
PPP1R1C	1.3529	0.00868124	1.3529
ZNF484	-2.74431	4.71e-12	2.74431
CDSN	2.65129	7.85e-10	2.65129
F7	3.00197	2.4e-31	3.00197
EMID1	-1.51864	1.3e-26	1.51864
ENKUR	2.11045	3.25e-10	2.11045
RTBDN	2.06454	9.67e-16	2.06454
KLF7	-1.09914	0.0390291	1.09914
HYDIN	4.85813	1.64e-13	4.85813
EPGN	4.88563	0.000515554	4.88563
PTGS1	-2.15594	0.000637805	2.15594
COLCA2	-2.17007	0.00032101	2.17007
ZNF423	1.35098	0.000299087	1.35098
C5AR2	2.82734	1.57e-139	2.82734
ITGBL1	1.85378	0.0313227	1.85378
REEP2	-1.01852	7.11e-91	1.01852
LRRC73	1.09684	2.13e-41	1.09684
CIB2	-1.6875	0.00458513	1.6875
VWA2	-1.12284	0.0225862	1.12284
AOC1	-1.26639	0.000247174	1.26639
C18orf65	-1.09269	0.00584955	1.09269
TNNT2	1.32086	0.000443328	1.32086
P2RY6	1.19502	0.0036138	1.19502
IGSF9B	-1.04077	0.0050985	1.04077
FMN1	2.16517	4.09e-196	2.16517
L1CAM	2.29168	3.13e-83	2.29168
FAM131B	2.05835	0.0456611	2.05835
ACTN2	2.33575	4.07e-05	2.33575
AMOTL2	-1.16943	2.55e-21	1.16943
DPF3	1.58573	8.99e-07	1.58573
EPB41L3	2.60745	5.24e-17	2.60745
KRT23	-1.19604	2.13e-99	1.19604
LRRC63	2.43661	0.000271185	2.43661
FAM107A	-1.2305	0.0237549	1.2305
MAP3K19	-3.14648	0.00514195	3.14648
C9orf171	-2.76651	8.64e-12	2.76651
STMN4	2.1608	0.000323723	2.1608
ADCY7	-1.09598	4.52e-05	1.09598
OLFML3	1.85567	2.22e-75	1.85567
TMEM179	1.37177	1.72e-25	1.37177
C14orf180	2.5464	0.00400595	2.5464
CIITA	3.88578	0.00117999	3.88578
ARMC12	1.579	0.0112097	1.579
AADAT	2.86265	0.0011288	2.86265
SYNPO2	-1.0907	1.85e-06	1.0907
MORN5	1.43192	1.48e-11	1.43192
UPP1	1.08846	1.13e-22	1.08846
LOC388780	1.38942	0.00660079	1.38942
SETSIP	-1.31133	0.0418665	1.31133
STK32A	1.01003	0.0351282	1.01003
HMGCLL1	3.11156	1.41e-09	3.11156
AFAP1L2	1.15902	0.00348851	1.15902
SMIM1	1.54513	5.5e-27	1.54513
TMPRSS5	-1.25212	0.0497274	1.25212
PDE1B	1.55562	0.0389601	1.55562
IFI27	4.93931	0.00575723	4.93931
SERPINA4	2.73922	4.62e-05	2.73922
MICB	1.87018	2.39e-177	1.87018
IFIT3	1.34741	1.12e-34	1.34741
RARB	-1.20456	1.41e-05	1.20456
FAM65C	-1.09223	2.48e-118	1.09223
LOC100129697	1.07572	0.00381142	1.07572
SYT8	2.95132	1.39e-48	2.95132
MGC50722	1.55583	5.11e-07	1.55583
ADPRH	1.82773	1.23e-23	1.82773
PRSS23	2.44192	4.79e-93	2.44192
ECSCR	-2.17886	0.0254845	2.17886
ALDH1A3	-1.40828	0	1.40828
ADGRB2	1.32591	8.83e-217	1.32591
ETNK2	2.25096	8.04e-196	2.25096
USH1C	1.36284	2.53e-12	1.36284
METTL15	-1.02759	0.00284403	1.02759
PCDH18	-2.34711	2.72e-11	2.34711
CCL28	1.15136	3.82e-188	1.15136
CCDC151	1.44609	2.99e-63	1.44609
COLCA1	-2.33093	3.08e-21	2.33093
C17orf77	2.99015	1.88e-05	2.99015
CYB5R2	1.45936	9.79e-10	1.45936
ADGRG5	1.15381	0.0100252	1.15381
SLC29A1	1.20639	1.17e-103	1.20639
EPHA4	-3.26544	6.32e-63	3.26544
PAX2	1.73812	2.58e-06	1.73812
STK32B	2.04286	1.06e-32	2.04286
FN1	-2.04924	1.82e-87	2.04924
GATA4	2.1211	1.61e-12	2.1211
ERN2	3.93396	0.0176852	3.93396
STXBP5L	1.2734	5.84e-32	1.2734
F2R	-1.08118	5.1e-55	1.08118
CST6	2.28737	0.0153152	2.28737
DNAH6	3.61337	1.74e-26	3.61337
DSCAM	1.10228	1.25e-30	1.10228
EDA	1.32014	0.00493135	1.32014
EFNB3	-1.71693	8.12e-41	1.71693
MEGF6	1.04152	2.15e-75	1.04152
EMP1	-1.3131	0.035522	1.3131
EMP3	-1.13802	4.74e-08	1.13802
FZD2	-1.01114	0.00246482	1.01114
GP2	1.47281	6.83e-11	1.47281
MLNR	-1.34629	0.027518	1.34629
IFIT2	1.19787	9.39e-48	1.19787
IFIT1	1.6208	1.05e-31	1.6208
IGSF1	1.49733	4.18e-08	1.49733
IMPG1	1.5842	0.0195397	1.5842
IRAK2	1.16831	0.0496813	1.16831
ADD2	-1.00061	0.000346033	1.00061
AHSG	1.42715	0.00479444	1.42715
APOF	2.38626	0.00264651	2.38626
APOD	3.52782	5.81e-45	3.52782
KLK3	3.42979	4.67e-22	3.42979
AREG	1.26331	4.65e-215	1.26331
ARSD	1.6759	5.68e-90	1.6759
ADGRB1	1.84716	8.69e-16	1.84716
C5	-1.27674	0.0161406	1.27674
CLU	2.76964	1.17e-12	2.76964
COL6A2	-1.79729	1.61e-08	1.79729
COL9A3	1.04686	1.94e-09	1.04686
COL15A1	4.15671	0.00181715	4.15671
COL16A1	1.73683	1.16e-08	1.73683
CR2	1.35992	0.00788562	1.35992
CTGF	-2.66455	3.9e-07	2.66455
CTSL	1.06108	1.43e-11	1.06108
DUSP6	1.88263	9.64e-106	1.88263
EDN2	1.60488	0.0201296	1.60488
FLT1	1.12807	1.27e-13	1.12807
FMO1	1.15867	2.2e-19	1.15867
FMO4	1.04405	2.14e-149	1.04405
FMOD	2.54848	0.000753671	2.54848
FUT4	1.2992	0.0468145	1.2992
IFI6	1.9388	9.17e-45	1.9388
GABRR2	1.84745	0.00558091	1.84745
GPX2	-1.4237	0.00652721	1.4237
CFHR1	-3.95105	0.000290382	3.95105
HLA-A	1.08919	3.66e-50	1.08919
HLA-G	1.07055	7.49e-10	1.07055
HSD17B2	1.1025	0.0306685	1.1025
INSM1	1.17159	3.04e-236	1.17159
ITGAL	1.53164	2.36e-22	1.53164
KCNF1	-1.11892	3.66e-35	1.11892
KCNK1	1.58617	3.77e-06	1.58617
KCNN4	2.53046	0.00497563	2.53046
KIF3C	-1.0882	0.00279185	1.0882
AFF3	2.50545	4.36e-254	2.50545
LAMA4	1.35688	6.02e-07	1.35688
LEPR	-1.48025	2.61e-08	1.48025
LIFR	1.13066	1.12e-05	1.13066
LOX	1.70671	6.35e-05	1.70671
LTF	3.84802	0.00932632	3.84802
MGAT3	1.1899	3.76e-07	1.1899
MSX1	1.5135	0.000825472	1.5135
MUC2	3.16563	0.00322784	3.16563
MUC5B	-1.63707	0.000255999	1.63707
NDN	-4.83397	2.71e-58	4.83397
NGFR	1.71544	7.25e-11	1.71544
NOV	2.3763	1.11e-11	2.3763
NPTX1	-1.19339	1.14e-18	1.19339
PDK4	1.01066	5.24e-15	1.01066
PDZK1	1.00969	5.34e-72	1.00969
PGC	3.04106	3.01e-08	3.04106
PIP	1.24626	0.000838433	1.24626
SRGN	2.06185	5.44e-09	2.06185
MAPK4	2.66866	0.0204722	2.66866
MAPK10	-1.15713	5.8e-11	1.15713
PRTN3	2.04372	2.1e-18	2.04372
QSOX1	1.56447	1.38e-125	1.56447
PTPRM	2.01132	2.47e-13	2.01132
PVALB	2.43286	0.00689397	2.43286
RASGRF1	-1.18029	9.78e-25	1.18029
RBP1	1.21749	3.71e-07	1.21749
RENBP	1.87046	4.84e-10	1.87046
ROBO2	-1.83583	2.44e-88	1.83583
S100A8	2.04163	0.000321588	2.04163
CCL5	1.74151	0.000191152	1.74151
SFTPC	1.11229	1.12e-05	1.11229
SNCG	5.43792	6.85e-78	5.43792
SOX2	-4.66073	1.15e-20	4.66073
SYT5	1.33549	1.1e-31	1.33549
TFF1	3.12785	4.84e-32	3.12785
TFF3	1.8673	1.63e-140	1.8673
THRSP	4.77073	1.44e-20	4.77073
TIMP1	1.10167	4.42e-37	1.10167
ICAM5	1.17207	4.67e-157	1.17207
TNNI2	3.29753	4.02e-06	3.29753
PHLDA2	1.58182	1.61e-84	1.58182
VGF	1.67847	7.69e-27	1.67847
WNT5A	2.4359	3.44e-09	2.4359
CXCR4	2.01167	1.38e-29	2.01167
HIST1H2BC	1.42645	1.55e-27	1.42645
HIST1H3G	1.66623	0.0167535	1.66623
HIST1H3B	3.17701	0.000200624	3.17701
HIST1H4H	1.0838	1.19e-08	1.0838
ANXA9	1.17475	5.46e-173	1.17475
LTBP4	1.14019	3.33e-73	1.14019
OASL	1.90305	2.38e-23	1.90305
STX11	2.45572	0.00112571	2.45572
ABCC3	1.04828	1.84e-23	1.04828
TNFSF12	4.40677	2.28e-06	4.40677
FBP2	-1.21515	0.0132891	1.21515
TNFRSF11A	1.09626	2.47e-55	1.09626
INPP4B	1.44665	7.12e-165	1.44665
NRP1	-1.05186	2.33e-24	1.05186
SOCS2	2.49749	4.55e-12	2.49749
WISP2	1.01833	6.1e-14	1.01833
ST3GAL5	1.38532	1.96e-05	1.38532
CCRL2	1.03322	0.0105417	1.03322
CA8	2.02706	8.43e-231	2.02706
CDR1	-1.85327	2.16e-08	1.85327
EMX1	2.52922	0.000838048	2.52922
FKBP1B	-1.23011	2.84e-09	1.23011
GBP2	1.20908	1.24e-20	1.20908
LBP	1.31691	0.00425321	1.31691
SLC1A1	1.12617	2.19e-18	1.12617
IL32	-2.53287	0.00519616	2.53287
GLP2R	2.77897	0.00325742	2.77897
AKAP6	-1.06087	4.15e-112	1.06087
CAMP	3.09367	0.00164876	3.09367
CRABP1	1.01147	1.08e-98	1.01147
EGR3	1.00523	3.51e-26	1.00523
EPHB1	-1.44477	7.24e-08	1.44477
EPHB2	-1.76346	1.13e-68	1.76346
ETV5	3.26846	0.00163368	3.26846
GNG4	1.49407	1.35e-34	1.49407
MYT1	-2.14135	0.000968716	2.14135
NCAM2	1.06583	1.82e-211	1.06583
PIK3C2G	4.68652	0.000189019	4.68652
SPOCK1	2.58785	0.0267675	2.58785
TGM2	3.68088	0.00458284	3.68088
LIN7A	1.48724	1.17e-09	1.48724
CLIC3	1.72051	1.65e-61	1.72051
PTGES	1.10222	1.04e-116	1.10222
RAB36	1.86853	1.95e-40	1.86853
KLK4	2.18028	1.19e-32	2.18028
AQP3	2.37622	1.05e-97	2.37622
DOCK2	-2.16821	0.00631574	2.16821
DOCK3	-1.02438	4.96e-37	1.02438
IBSP	-1.07582	0.00133961	1.07582
KCND3	1.19421	8.11e-06	1.19421
KCNJ8	1.16231	2.5e-07	1.16231
MAGEA1	-1.23588	2.25e-94	1.23588
ROR1	1.28229	1.1e-06	1.28229
RAPSN	-1.90719	0.00326585	1.90719
RORC	1.79307	3.18e-114	1.79307
ADAMTS4	1.55705	2.4e-26	1.55705
ISG15	1.26934	1.68e-14	1.26934
TNFSF15	2.27682	0.00606766	2.27682
HR	1.05678	3.02e-51	1.05678
APLP1	1.29378	4.29e-09	1.29378
PPM1J	1.04184	1.18e-145	1.04184
CEBPB	-1.09646	0.00259532	1.09646
DLX5	1.57064	0.0337862	1.57064
F2RL1	-1.29519	6e-80	1.29519
EYA2	-1.46407	4.03e-20	1.46407
FOSL2	-1.00093	6.52e-33	1.00093
GJA5	1.59516	2.8e-06	1.59516
GJB5	1.72828	0.000231793	1.72828
MCHR1	2.78712	4.66e-20	2.78712
GPR37	2.16136	1e-31	2.16136
FFAR2	1.54774	2.2e-05	1.54774
HIST1H1C	1.47165	2.03e-14	1.47165
HIST1H1D	1.44792	0.000251245	1.44792
HIST1H1B	-1.502	9.68e-05	1.502
LCK	1.58692	0.000856619	1.58692
MAF	1.38406	0.0494953	1.38406
MAGEA3	-7.18099	2.83e-210	7.18099
MAGEA6	2.49794	2.86e-136	2.49794
MAGEA12	-3.12035	9.25e-99	3.12035
MYCN	-1.5087	0.000848853	1.5087
PPP1R3C	1.96102	1.39e-69	1.96102
HLA-B	1.19102	7.32e-06	1.19102
HMGCS2	1.41956	3.18e-06	1.41956
IFI16	2.53805	1.97e-16	2.53805
ITK	1.45054	2.06e-05	1.45054
KLK2	3.97296	2e-15	3.97296
LAMC2	1.1318	0.0271891	1.1318
LGALS3BP	1.11311	9.6e-17	1.11311
SLCO2A1	1.38637	1.19e-13	1.38637
SSX1	1.54732	0.000211212	1.54732
NR2F1	1.18302	5.46e-72	1.18302
EDIL3	1.54639	0.000123043	1.54639
TSPAN1	-1.08709	2.56e-42	1.08709
PPIF	1.13822	8.76e-44	1.13822
CLEC3A	2.491	3.45e-15	2.491
PDZK1IP1	1.66479	0.000419862	1.66479
CHST4	2.02784	6.3e-06	2.02784
MAN1A1	3.1175	8.63e-35	3.1175
MAP1B	3.37076	2.57e-25	3.37076
MT1F	-1.02048	4.54e-21	1.02048
S100A2	1.58549	0.00103377	1.58549
S100P	1.89109	2.97e-07	1.89109
TBX10	2.59913	0.0427846	2.59913
WFDC2	2.56658	5.02e-17	2.56658
NKX6-1	1.81413	7.8e-05	1.81413
NPY5R	1.55642	7.61e-13	1.55642
OAS3	1.4048	3.44e-19	1.4048
PCP4	-2.19383	1.53e-10	2.19383
ENPP2	1.0328	0.0155239	1.0328
PNLIPRP1	1.39342	0.0322015	1.39342
RP1	1.62584	0.000448557	1.62584
S100A1	1.40488	1.5e-61	1.40488
TRIM38	2.57501	9.02e-22	2.57501
IFI44	1.21884	6.89e-54	1.21884
CXCL13	2.7253	2.04e-11	2.7253
COLEC10	2.17748	0.00469539	2.17748
TXNIP	1.03461	0.025802	1.03461
RASL10A	-1.0321	2.35e-09	1.0321
CLCA2	3.03423	3.01e-05	3.03423
IGF2BP2	3.16857	1.93e-15	3.16857
SULT1C4	2.82334	0.0290436	2.82334
IQGAP2	2.1193	2.67e-08	2.1193
SPINT3	2.92719	2.71e-05	2.92719
RBP4	2.42542	1.52e-05	2.42542
SIPA1	3.17401	2.4e-36	3.17401
IFI44L	2.51677	3.51e-12	2.51677
ADIRF	2.4644	0	2.4644
GMPR	1.6286	0.00066902	1.6286
HOXA7	-1.09334	0.000332303	1.09334
C10orf10	1.13031	0.0472282	1.13031
CAPN11	3.37847	3.04e-08	3.37847
FSTL1	-1.46517	4.3e-36	1.46517
ZNF208	2.10231	1.24e-10	2.10231
DUSP10	1.12944	9.96e-06	1.12944
NXPH3	1.48199	2.6e-154	1.48199
CYP4F8	1.96993	2.18e-81	1.96993
LAMB4	2.59448	0.0144507	2.59448
ELL2	1.22841	5.43e-06	1.22841
TMEM59L	1.58084	2.1e-07	1.58084
HAAO	1.90215	0.0140986	1.90215
MYO1B	-1.14342	3.78e-29	1.14342
HEY2	-1.6047	1.39e-28	1.6047
MAPK8IP2	2.28457	2.34e-07	2.28457
TSPAN12	1.16649	1.28e-62	1.16649
BAMBI	-1.49145	3.69e-12	1.49145
TPSG1	-1.26639	4.98e-11	1.26639
SCG3	-1.20411	0.000653198	1.20411
C2orf27A	1.81357	0.0204547	1.81357
GGT1	1.47044	0.000180383	1.47044
PSORS1C1	1.33988	0.00253941	1.33988
KLF15	1.78782	1.49e-12	1.78782
P3H3	1.28442	1.02e-06	1.28442
SLC7A11	-1.07769	0.000162941	1.07769
CADM1	1.03693	0	1.03693
HSPB8	3.53839	0	3.53839
KCNV1	1.18625	1.26e-11	1.18625
PALD1	2.87382	0.0160975	2.87382
CNTN6	-1.55792	5.37e-23	1.55792
SPINK4	-1.26639	1.96e-08	1.26639
KCNMB4	3.08265	3.27e-51	3.08265
SLC40A1	-1.13616	7.43e-18	1.13616
ATP11B	-1.39738	0.00010759	1.39738
BRINP1	1.03308	7.25e-20	1.03308
S100A6	1.5351	1.67e-14	1.5351
RASSF2	-1.97486	0.0281168	1.97486
JAKMIP2	4.16331	0.0412291	4.16331
TRANK1	1.09906	2.55e-06	1.09906
ARNT2	-1.41454	2.44e-52	1.41454
PPM1E	1.31301	1.31e-60	1.31301
ARSG	1.16861	2.15e-116	1.16861
SYNE2	-1.01186	0.0392355	1.01186
CUX2	-1.48261	1.15e-37	1.48261
PARM1	1.72084	4.39e-13	1.72084
MXRA5	-4.72326	5.22e-14	4.72326
TRIM58	2.90083	0.020394	2.90083
LRIG1	-1.14923	1.46e-06	1.14923
ACOT11	1.81749	3.92e-07	1.81749
ERC2	-1.13687	0.000864062	1.13687
PLA2G3	1.89467	1.06e-08	1.89467
CALY	-1.26639	0.00138351	1.26639
PI15	-2.83688	0.00103595	2.83688
ZMYND10	-1.01915	4.71e-98	1.01915
GAL	1.01829	4.35e-29	1.01829
CAMK2A	1.44028	0.00225977	1.44028
RHCG	2.19456	0.00822076	2.19456
CPA4	1.34626	3.43e-05	1.34626
VCX3A	2.49602	4.06e-06	2.49602
SYT17	-1.18033	0.0133869	1.18033
SLC15A3	1.25061	0.00449436	1.25061
THEG	-1.20146	1.49e-08	1.20146
FOLR1	2.76908	7.33e-17	2.76908
OAS2	1.51783	7.63e-46	1.51783
TAS2R4	-1.93902	0.00686383	1.93902
USP18	1.00599	2.08e-07	1.00599
MFAP2	-2.4069	0.0355224	2.4069
DNAH3	1.01151	5.49e-33	1.01151
EPDR1	2.60922	9.64e-10	2.60922
SLC43A3	-2.03226	7.2e-13	2.03226
SAMD9	1.69314	0.00176109	1.69314
TRPM6	1.02491	0.0247552	1.02491
FAM46C	1.41878	8.14e-11	1.41878
ELOVL2	6.82186	1.68e-05	6.82186
DUSP23	1.14641	0.00241268	1.14641
WIPI1	1.42881	1.18e-217	1.42881
TMEM45A	2.05748	9.08e-19	2.05748
LRRN3	1.47907	1.92e-68	1.47907
SLC22A15	1.47046	1.98e-28	1.47046
ARHGAP15	1.02712	1.39e-08	1.02712
GABRQ	-1.21874	0	1.21874
CAMK2N1	1.0079	0.00382338	1.0079
TRIM36	1.39302	1.12e-52	1.39302
ADARB2	1.19853	0.000912242	1.19853
TMEM55A	1.16778	0.0401847	1.16778
BCAP29	1.39145	7.12e-06	1.39145
DNAH7	-1.02827	5.56e-17	1.02827
PCDHA1	1.46592	1.07e-16	1.46592
PCDHB12	1.26817	0.00120128	1.26817
SASH3	-4.33268	0.0424471	4.33268
APBB1IP	3.95168	0.000375934	3.95168
USP53	-1.13036	9.06e-34	1.13036
NECAB2	2.06039	8.44e-25	2.06039
DLL4	1.24482	7.23e-06	1.24482
MAP10	1.25682	7.1e-08	1.25682
CNGB3	-2.78126	0.0437445	2.78126
HLA-DRA	1.78409	0.001499	1.78409
S100A4	1.54786	1.16e-07	1.54786
CYP26B1	1.28773	1.14e-08	1.28773
HLA-DQA2	2.31203	0.00134241	2.31203
SLC17A7	-2.21229	0.0287288	2.21229
TMEM63C	2.42864	2.64e-38	2.42864
JPH2	-1.02564	3.4e-06	1.02564
ATP8B2	1.04911	7.23e-103	1.04911
EPHA8	2.23599	2.26e-05	2.23599
RCN3	-2.20727	0.0020499	2.20727
ZNF608	-1.04962	0.0151682	1.04962
STARD9	-1.12867	0.00688	1.12867
SRGAP1	-1.32044	1.58e-108	1.32044
PTCHD2	1.60915	0.0329672	1.60915
DCDC5	-1.26639	2.23e-05	1.26639
SH3RF1	-1.13088	2.32e-09	1.13088
CNTN3	1.05906	0.0493434	1.05906
LRRN1	1.12922	0.0229487	1.12922
DNAH2	1.07689	1.36e-21	1.07689
CCDC146	-1.04364	2.61e-22	1.04364
SPTBN4	1.35617	0.000435639	1.35617
GBA3	2.796	6.6e-08	2.796
RET	1.81719	2.37e-05	1.81719
DNASE2B	2.36914	0.000418363	2.36914
PELI2	-2.89887	1.73e-16	2.89887
KCNN2	1.93898	0.000264879	1.93898
MFAP3L	1.52378	3.48e-63	1.52378
RAI2	1.34623	1.9e-21	1.34623
PLAC1	1.43995	0.0064999	1.43995
ELOVL5	1.39142	2.05e-14	1.39142
SCT	1.09137	0.00060792	1.09137
BCAN	1.93945	3.24e-16	1.93945
ATP2B3	2.48555	4.95e-05	2.48555
GJA3	-4.32466	5.35e-15	4.32466
PGM5	-2.68506	4.71e-06	2.68506
KCNK13	1.55775	2.17e-10	1.55775
CLSTN2	1.2426	2e-263	1.2426
NOD2	1.09725	1.07e-91	1.09725
RAB38	1.61005	3.32e-10	1.61005
NECAB1	1.51996	8.31e-07	1.51996
KCNK15	1.30062	1.26e-56	1.30062
EDDM3B	1.97366	8.5e-06	1.97366
ICAM4	2.10287	3e-06	2.10287
SLC6A20	2.5848	2.23e-06	2.5848
GREM2	-1.13402	1.13e-21	1.13402
CLEC7A	1.63012	0.00615921	1.63012
PRRX1	1.82365	0.00205997	1.82365
2025-03-01	1.14699	1.05e-07	1.14699
FNDC4	-1.54332	0.0386925	1.54332
PLEKHG2	-1.34423	5.96e-82	1.34423
RASAL3	1.24531	0.00211169	1.24531
FGFR3	1.25269	1.37e-207	1.25269
HAPLN4	1.2265	1.18e-05	1.2265
GPR87	-2.11774	1.29e-06	2.11774
C1orf116	1.462	2.89e-14	1.462
TMEM108	3.55968	2.28e-11	3.55968
CYP4F12	2.42245	0.03069	2.42245
GJB3	1.12361	0.0215606	1.12361
METRN	1.2111	5.55e-40	1.2111
CAMKV	2.20121	0.0318974	2.20121
HOXD1	-1.21686	0.00302097	1.21686
LRRC2	-4.15042	0.0217059	4.15042
CHST5	1.51893	4.4e-05	1.51893
CHPF	1.26105	5.15e-07	1.26105
FAT4	1.27379	0.000655512	1.27379
BEND5	-1.33413	9.56e-07	1.33413
MSANTD2	-1.14215	2.13e-06	1.14215
LIN28A	5.60963	9.74e-137	5.60963
MMRN2	1.99806	2e-38	1.99806
MOB3B	1.1558	1.28e-12	1.1558
CATSPERB	-1.15415	0.00475153	1.15415
AGBL2	-1.03526	1.18e-46	1.03526
CPED1	2.8019	0.000993798	2.8019
POF1B	3.69149	1.23e-07	3.69149
CES3	1.06828	9.89e-18	1.06828
FRAS1	-1.60092	4.25e-09	1.60092
MOGAT2	2.84846	3.82e-06	2.84846
ATP10B	1.54081	2.98e-09	1.54081
PLXNA2	2.82277	4.73e-09	2.82277
MTERF2	-1.39953	2.93e-93	1.39953
CXXC4	-3.16241	2.06e-16	3.16241
TET1	-1.08275	4.42e-08	1.08275
BHLHE41	3.21651	8.74e-05	3.21651
CFHR5	3.75277	0.0346532	3.75277
ACTL8	1.81653	1.6e-13	1.81653
LBH	-5.27884	0.00919366	5.27884
TMEM163	1.29387	4.19e-08	1.29387
C1QTNF3	-1.85747	0.0020565	1.85747
ADAMTS12	3.49066	0.02221	3.49066
SPRY4	3.2522	3.61e-15	3.2522
ST6GALNAC5	1.92615	2.52e-05	1.92615
TTC25	-1.10096	1.45e-19	1.10096
INHBE	-1.22879	2.43e-05	1.22879
CACNG6	-1.03072	0.00699319	1.03072
AGXT2	-1.53929	0.0424199	1.53929
MYCBPAP	1.77105	4.58e-10	1.77105
ANTXR1	-1.08676	2.14e-119	1.08676
LOXL4	1.1538	0.000710864	1.1538
SLITRK6	3.56472	1.35e-24	3.56472
ATP13A4	2.59021	2.87e-42	2.59021
PSD2	1.57091	0.000128462	1.57091
FBN3	-1.16334	1.21e-13	1.16334
MFSD2A	1.64216	4.11e-15	1.64216
ATOH8	2.6421	0.00190188	2.6421
TNS4	1.17326	4.08e-51	1.17326
UBASH3B	-1.78347	3.88e-33	1.78347
COL27A1	-1.64132	6.07e-10	1.64132
NKD1	1.79685	1.05e-12	1.79685
SEC16B	1.02067	0.0331913	1.02067
CALD1	1.05351	1.49e-45	1.05351
LDHAL6B	1.9869	0.0321543	1.9869
BOC	-1.25772	1.14e-35	1.25772
EPSTI1	1.24876	3.43e-09	1.24876
MID1	-1.09746	1.1e-09	1.09746
SLAMF9	1.14229	0.0147026	1.14229
DISP2	-1.069	2.75e-20	1.069
CDH7	3.88858	2.34e-12	3.88858
CELF6	-1.18558	0.00741348	1.18558
GNG7	-1.30762	1.18e-07	1.30762
NALCN	2.19893	7.85e-08	2.19893
PKD1L2	2.11208	0.00630311	2.11208
RNF157	-1.53865	7.09e-14	1.53865
C8orf34	3.49331	5.42e-06	3.49331
LRG1	1.636	1.5e-26	1.636
CLIC6	1.5508	2.99e-66	1.5508
DCD	1.8623	0.0214962	1.8623
TEKT1	-1.19857	6.58e-18	1.19857
TRIM6	1.90405	0.0297578	1.90405
WNT7B	-1.1914	3.69e-111	1.1914
HIST1H2AH	1.58411	0.00626104	1.58411
MAG	2.55366	3.11e-06	2.55366
VSTM2L	1.76138	1e-14	1.76138
CCM2L	1.50876	3.62e-13	1.50876
RSAD2	1.89773	1.17e-38	1.89773
KCNE4	1.17513	7.71e-15	1.17513
COL11A2	1.02879	8.93e-13	1.02879
COL13A1	1.64893	1.43e-06	1.64893
WFDC6	1.83725	1.59e-17	1.83725
SPSB4	-1.62827	7.54e-16	1.62827
RAB40A	1.03669	0.0384892	1.03669
XAGE2	2.6977	0.0196045	2.6977
COX7B2	2.43999	0.00417688	2.43999
AGAP11	1.74329	6.2e-26	1.74329
COL26A1	-1.55396	2.39e-08	1.55396
AMZ1	1.67246	3.56e-254	1.67246
PKD1L1	1.94254	2.39e-97	1.94254
KIF12	1.3335	2.57e-48	1.3335
KCTD12	1.02026	0.000274425	1.02026
ZNF689	1.66059	5.55e-08	1.66059
PKHD1	1.17997	1.95e-16	1.17997
HEPH	3.27232	3.46e-05	3.27232
MYEOV	1.71292	7.57e-14	1.71292
ESAM	-1.07254	4.96e-07	1.07254
SDR16C5	1.08318	0.044894	1.08318
OLIG1	2.97479	1.23e-05	2.97479
MYO3B	1.09795	0.0189736	1.09795
DNER	1.33355	0.00321491	1.33355
HOPX	1.89127	1.26e-09	1.89127
GAS2L2	3.36133	4.73e-15	3.36133
AMPH	3.40388	3.8e-10	3.40388
BIRC7	2.09618	3.19e-12	2.09618
BIN1	1.22877	6.3e-05	1.22877
KLK8	4.74089	0.000209977	4.74089
NEXN	-1.14754	0.00595216	1.14754
SFXN5	1.03049	3.14e-06	1.03049
ATP6V1C2	1.22259	0.000789098	1.22259
RFTN2	-1.98076	0.00550674	1.98076
CAPSL	1.77166	8.32e-39	1.77166
PXDNL	4.04571	6.07e-09	4.04571
EFHB	2.36204	4.96e-21	2.36204
FOXI1	-1.65369	0.028062	1.65369
FREM1	2.09534	0.0238714	2.09534
TMEM106A	1.04344	7.64e-25	1.04344
RNF183	1.03791	4.87e-05	1.03791
DACT3	1.26446	1.14e-06	1.26446
STAC3	-1.11337	0.0010696	1.11337
WDR63	-1.31608	0.0450364	1.31608
SLC25A48	2.12008	7.61e-10	2.12008
TIGD4	-1.42907	0.000101411	1.42907
SYNM	-2.43898	2.18e-06	2.43898
ISL2	-1.14934	0.00191947	1.14934
SPIC	1.02012	0.0466943	1.02012
UBXN10	-1.27217	7.6e-39	1.27217
SGPP2	1.31744	0.000302108	1.31744
ZNF572	-1.05275	1.64e-10	1.05275
MUM1L1	-1.69384	2.39e-09	1.69384
FGD5	1.66358	2.42e-41	1.66358
CCDC185	1.25096	0.00152131	1.25096
KNDC1	2.16828	2.9e-25	2.16828
SAMD9L	1.67372	0.00129277	1.67372
CPNE2	-1.01129	8.82e-81	1.01129
BEND6	1.02254	0.000786179	1.02254
LRRC43	1.09202	1.31e-05	1.09202
C8orf46	-2.0743	1.33e-12	2.0743
APCDD1	2.7657	4.07e-07	2.7657
FBLN7	-1.00704	0.000814508	1.00704
TXLNB	1.22177	3.11e-05	1.22177
BEST4	-2.71866	8.52e-05	2.71866
TMEM86A	1.67119	0.00118691	1.67119
SVEP1	-4.22141	0.0148517	4.22141
HS6ST3	1.35966	6.81e-50	1.35966
CSAG1	-2.75889	8.53e-51	2.75889
ZNF114	-1.8952	8.46e-09	1.8952
RTP1	-1.06828	0.042743	1.06828
RASGRP2	1.44649	6.3e-05	1.44649
ADGRF4	3.68087	0.000417889	3.68087
SH2D3C	1.84483	4.78e-09	1.84483
SALL3	-2.16125	8.39e-06	2.16125
PLEKHH2	-1.5842	1.79e-05	1.5842
KCNQ2	2.10035	0.000150419	2.10035
SCUBE1	2.36162	0.0145387	2.36162
PTK2B	1.07471	5.89e-09	1.07471
MISP	1.14803	0.0352794	1.14803
C10orf91	1.43522	2.59e-07	1.43522
C3orf58	1.98862	0.00109551	1.98862
C10orf107	-2.1983	2.19e-06	2.1983
NYAP1	-1.22722	0.0214013	1.22722
VWA3A	1.17674	1.27e-14	1.17674
FAM133A	3.36736	2.54e-06	3.36736
LVRN	-2.11619	0.00371776	2.11619
LYG1	-1.27315	0.0168377	1.27315
UGT3A2	1.12167	2.95e-17	1.12167
ZPLD1	5.68186	0.000147881	5.68186
SLA2	-1.53658	0.00386909	1.53658
GRIK1	-1.20233	0.00679321	1.20233
KLB	-1.56292	0.0195397	1.56292
CHSY3	1.14208	1.74e-07	1.14208
TMTC1	3.49079	4.85e-09	3.49079
PRR15	1.18383	7.29e-35	1.18383
NHLRC4	1.38197	2.87e-56	1.38197
FAM171B	1.02665	0.0195203	1.02665
BHLHA15	3.41911	5.52e-16	3.41911
TUBB2B	1.36162	3.41e-13	1.36162
PRIMA1	-1.16519	9.64e-89	1.16519
CYP4Z1	1.7054	1.74e-05	1.7054
NAT8L	1.05039	1.35e-11	1.05039
FBXO27	1.11471	5.46e-22	1.11471
C1orf64	3.55646	2.61e-12	3.55646
CMTM8	1.21064	3.05e-47	1.21064
SLCO4C1	3.05166	1.44e-05	3.05166
KAAG1	1.44221	0.0436003	1.44221
CCDC39	-1.09959	4.16e-07	1.09959
PIFO	1.47678	3.46e-54	1.47678
ASPHD1	1.55916	2.44e-118	1.55916
COG5	1.10567	1.2e-06	1.10567
FFAR4	1.77636	1.31e-05	1.77636
GLDN	2.53945	0.0098731	2.53945
RXFP4	2.24993	0.00105522	2.24993
STARD5	-1.20272	3.8e-22	1.20272
CBLN2	-3.15823	6.79e-05	3.15823
MYRFL	2.75534	1.11e-06	2.75534
TCTE1	1.24485	1.63e-07	1.24485
LHFPL5	2.27001	9.83e-08	2.27001
THEM5	1.26093	0.0214374	1.26093
ZNF454	1.39006	0.00833754	1.39006
TMEM255B	2.82263	2.28e-05	2.82263
C2orf48	-1.2534	0.00272712	1.2534
DLC1	1.18309	2.76e-55	1.18309
WDR72	-1.5447	7.66e-33	1.5447
SCARA3	2.96419	1.22e-86	2.96419
PLAC4	-1.01948	0.0107238	1.01948
ASIC4	1.50808	0.0489511	1.50808
HPN	-3.19436	2.33e-82	3.19436
TRIM55	2.53569	0.000867852	2.53569
CPXM2	2.3845	2.48e-05	2.3845
UTS2B	-1.53833	0.0391213	1.53833
GPRIN3	2.38953	0.0331085	2.38953
GOLT1A	1.46903	3.35e-07	1.46903
EMB	4.00011	2.54e-13	4.00011
ANKRD45	2.34434	0.0391743	2.34434
ZFP69	-1.08548	0.010053	1.08548
GALNT18	1.11437	2.49e-51	1.11437
CATIP	-2.04687	2.44e-14	2.04687
NAT16	-1.20211	0.00323405	1.20211
ENHO	-3.86767	8.99e-07	3.86767
SYT10	2.06967	0.00687263	2.06967
STAC2	1.98693	2.28e-17	1.98693
BRINP3	3.86571	0.00315402	3.86571
CLDN8	1.18948	2.01e-81	1.18948
ZNF365	2.32533	0.000496708	2.32533
RASSF6	1.32724	0.0275822	1.32724
GAS7	-1.34249	2.16e-73	1.34249
SEZ6L2	1.40804	6.9e-91	1.40804
FAM83A	2.18868	0.000124602	2.18868
CCDC64	1.21764	8.96e-55	1.21764
ZNF474	-2.16245	5.47e-14	2.16245
C2CD4A	2.02356	2.18e-13	2.02356
KBTBD12	-1.34129	0.00340332	1.34129
CYP4V2	-1.03178	7.7e-39	1.03178
NCKAP5	1.17528	2.61e-38	1.17528
C15orf52	-1.69181	1.19e-54	1.69181
CLPSL2	2.10932	4.47e-39	2.10932
