# Supplementary material for: A tumor-agnostic, topology-informed scoring framework for drug repurposing: application to CDK4/6 inhibitor resistance in HR+ breast cancer
Source: Research Square preprint supplement (doi:10.21203/rs.3.rs-6447930/v1), 2025-05-06
Supplement: Supplementary file 9 [file 85e78cce75a217ea251a6973.xlsx]

## Sheet: Sheet1
Table S5
Primer and siRNA sequences.
Primers	Sequences
GAPDH-homo(Sequences-F)	GGAGCGAGATCCCTCCAAAAT
GAPDH-homo(Sequences-R)	GGCTGTTGTCATACTTCTCATGG
FGFR3-homo(Sequences-F)	AGGATGCCTGCATACACACTGC
FGFR3-homo(Sequences-R)	ACACCCTACGTTACCGTGCTCAAG
FLT3-homo(Sequences-F)	AGTCAGAAGGGACTGGCTCC
FLT3-homo(Sequences-R)	GAGTGCTGCTTAGCAGATTACC
Sequences for siRNAs
si-FGFR3#1(Sequences-F)	CCACCGACAAGGAGCUAGATT
si-FGFR3#1(Sequences-R)	UCUAGCUCCUUGUCGGUGGTT
si-FGFR3#2(Sequences-F)	CGCGUACUGUGCCACUUCATT
si-FGFR3#2(Sequences-R)	UGAAGUGGCACAGUACGCGTT
