# Supplementary material for: A tumor-agnostic, topology-informed scoring framework for drug repurposing: application to CDK4/6 inhibitor resistance in HR+ breast cancer
Source: Research Square preprint supplement (doi:10.21203/rs.3.rs-6447930/v1), 2025-05-06
Supplement: Supplementary file 10 [file 8b744e1dc76d7b9e43e74146.xlsx]

## Sheet: Sheet1
Gene	log2FoldChange	padj	absLogFC
ADRB2	2.97142	4.74e-15	2.97142
ASS1	2.04036	7.52e-74	2.04036
COL4A3	1.44088	0.0333214	1.44088
DMD	1.20392	1.2e-08	1.20392
DPYD	2.41761	0.0289168	2.41761
SLC26A3	3.02345	1.9e-19	3.02345
EDNRB	1.39104	0.014762	1.39104
ENG	1.00852	2.96e-06	1.00852
FGFR2	-1.22978	1.56e-19	1.22978
GLDC	1.01825	8.55e-07	1.01825
CFH	3.98843	7.35e-07	3.98843
HGD	1.31177	0.00421083	1.31177
JAG1	-1.4809	2.33e-52	1.4809
JAK3	1.07106	3.42e-06	1.07106
LAMB3	2.10046	1.15e-17	2.10046
LIPA	1.19688	8.33e-28	1.19688
MYO7A	1.4154	2.1e-06	1.4154
NDP	-2.41588	0.000174628	2.41588
STS	1.4309	3.6e-28	1.4309
ABCC8	3.80247	5.04e-13	3.80247
TAT	3.74031	1.09e-20	3.74031
TGM1	1.26743	1.45e-05	1.26743
ITGA2B	-1.01773	0.00977593	1.01773
KRT17	1.94696	0.00248341	1.94696
NEU1	1.18045	3.2e-21	1.18045
OXCT1	2.50143	1.36e-25	2.50143
SLC5A5	2.26053	0.00538516	2.26053
TWIST1	2.81713	1.53e-11	2.81713
IL1RN	1.8694	0.0338074	1.8694
TNF	4.84723	0.0167153	4.84723
IGFBP5	-1.50825	2.43e-29	1.50825
CXCL12	2.57758	1.88e-26	2.57758
NCAM1	3.48607	0.00827995	3.48607
SERPINA5	1.41584	0.0439908	1.41584
CXCR1	3.92829	2.56e-07	3.92829
ADORA1	2.04256	7.88e-16	2.04256
ANXA1	1.07285	0.0152495	1.07285
CACNA1B	1.39829	0.0262356	1.39829
CACNB1	1.13753	3.55e-09	1.13753
CRAT	1.32607	5.35e-18	1.32607
CYP2E1	-2.18222	0.00671936	2.18222
CYP2J2	1.01418	6.38e-14	1.01418
ACE	1.54597	7.05e-19	1.54597
DIO1	-2.45303	0.00288619	2.45303
DIO2	2.99041	1.89e-26	2.99041
DRD1	1.34055	0.0133953	1.34055
GHRHR	5.49699	0.0109326	5.49699
GNRH1	-1.29764	0.030631	1.29764
GRIK3	2.14392	4.2e-62	2.14392
GRIN2C	-1.01053	0.0017516	1.01053
HTR1D	1.43056	0.0126777	1.43056
MME	3.85499	0.00440355	3.85499
NPY1R	1.897	0.00625339	1.897
PON3	1.29508	1.62e-11	1.29508
C14orf37	1.68684	0.000641032	1.68684
FCRLB	1.89507	2.09e-09	1.89507
CACNA1I	1.08189	0.00102351	1.08189
MGLL	1.38354	8.41e-34	1.38354
C1orf168	1.10224	0.0156519	1.10224
FGFRL1	1.08011	2.02e-26	1.08011
ANKRD34B	-1.00727	0.000103219	1.00727
GPNMB	2.92046	6.65e-14	2.92046
C1QL4	-1.18448	0.00258749	1.18448
SLC7A2	4.43117	4.9e-08	4.43117
C6orf1	1.11801	3.05e-09	1.11801
SULT1C3	3.6406	0.0294323	3.6406
SHE	2.0353	3.63e-05	2.0353
CLPSL1	2.44851	1.25e-07	2.44851
SLC6A17	1.2998	8.29e-07	1.2998
GLYATL3	-4.88006	1.72e-34	4.88006
ROPN1B	1.36654	0.0106468	1.36654
BEX5	1.51301	0.00274291	1.51301
NHSL2	1.70535	0.000607429	1.70535
PLIN5	1.62851	4.4e-17	1.62851
RUNX2	2.96884	3.97e-16	2.96884
INPP5D	2.25164	0.00102571	2.25164
C2orf76	1.20287	3.67e-10	1.20287
FAM78B	1.59783	0.0286819	1.59783
RGAG4	1.15789	4.04e-09	1.15789
CHN1	1.02687	2.67e-05	1.02687
ARHGAP24	-2.68392	6.38e-08	2.68392
PDE8B	-1.3521	0.00705791	1.3521
ALDH3B2	1.12008	2.44e-17	1.12008
OAS1	1.92922	1.16e-07	1.92922
MYCL	-1.14265	8.47e-06	1.14265
MTUS2	1.98636	0.0176102	1.98636
RYR2	2.91677	6.24e-20	2.91677
SCD5	-1.5001	6.62e-21	1.5001
GATSL3	1.18792	1.4e-08	1.18792
SCNN1G	1.96174	0.000168738	1.96174
AIM1L	1.47814	6.39e-12	1.47814
CD14	1.85177	0.0487175	1.85177
CD53	2.77456	1.01e-06	2.77456
SYPL2	1.34013	0.017641	1.34013
RYR1	1.08611	1.57e-07	1.08611
MUC1	2.32019	2.34e-65	2.32019
SSTR2	1.56063	1.04e-14	1.56063
TMEM231	1.46854	4.54e-14	1.46854
KLK10	1.21909	0.00487682	1.21909
EXOC3L4	1.79093	0.0284595	1.79093
TMEM52B	-1.73298	0.000942285	1.73298
FAM155A	3.88377	1.34e-12	3.88377
ZNF99	1.76712	0.00632904	1.76712
DLGAP3	1.07399	0.00487045	1.07399
UNC13A	1.97703	0.0485193	1.97703
CCDC85A	3.5485	0.0207821	3.5485
IGSF5	1.14602	0.0296117	1.14602
PEAR1	3.19526	7.09e-10	3.19526
DDC	4.07567	1.1e-24	4.07567
SERPINA3	1.38598	0.000175069	1.38598
HLA-F	1.32058	2.04e-07	1.32058
SGSM1	-1.18782	0.000543826	1.18782
ZNF98	1.69987	1.94e-06	1.69987
SFTPA2	2.05785	2.65e-07	2.05785
TENM4	1.29901	0.0134811	1.29901
NIPAL4	1.74874	4.05e-20	1.74874
SH3RF3	-1.3917	0.000269003	1.3917
JAKMIP1	1.67224	0.000246669	1.67224
SYBU	-1.06365	4.39e-11	1.06365
MBOAT4	-4.47594	0.00814283	4.47594
FAM183A	-1.27236	0.00892001	1.27236
PCP4L1	1.78676	4.46e-05	1.78676
SMTNL1	1.56008	0.0140292	1.56008
NAV2	2.03767	1.13e-18	2.03767
ACVR1C	2.48641	0.000227176	2.48641
SCIN	2.14177	5.09e-11	2.14177
SLC8A1	-2.12063	0.0314316	2.12063
MDGA2	1.42284	4.53e-06	1.42284
TTC22	3.09377	0.025904	3.09377
TENM2	1.08771	3.67e-09	1.08771
SERPINI1	1.76517	1.01e-05	1.76517
SLC6A12	1.75472	0.0291052	1.75472
FAM189A2	5.05565	1.62e-05	5.05565
FBP1	1.61961	5.9e-47	1.61961
SERPINA1	1.0414	1.54e-10	1.0414
CHST8	2.77414	0.000942946	2.77414
SULF1	-3.4998	2.14e-20	3.4998
RELL2	1.35574	4.67e-14	1.35574
LEF1	-1.37264	1.36e-11	1.37264
HRH2	3.72049	0.0477396	3.72049
ESRRG	2.11296	1.56e-05	2.11296
LRRC15	2.54814	0.000208171	2.54814
C10orf71	4.36846	0.00282868	4.36846
TGFB2	-1.6702	4.4e-17	1.6702
SSPN	1.20523	5.9e-07	1.20523
C2CD4C	-1.59166	0.000149646	1.59166
DCAF8L2	2.25668	0.0231147	2.25668
ZNF732	1.51675	0.00199153	1.51675
ZNF860	1.39231	0.00485362	1.39231
FGF13	1.84124	6.3e-08	1.84124
ALOX15	1.65284	0.00192639	1.65284
C9orf47	1.15022	0.00305857	1.15022
P4HA2	1.27771	1.3e-16	1.27771
ACOXL	-2.31856	0.0122595	2.31856
SLC38A4	3.48184	0.00498723	3.48184
MAPRE2	1.43488	3.95e-17	1.43488
RPH3A	3.32034	5.89e-07	3.32034
CAPN8	1.00828	0.00518065	1.00828
TLE6	1.64068	4.95e-08	1.64068
CITED1	3.79303	0.00310128	3.79303
SLCO3A1	-1.29225	6.63e-15	1.29225
LRRC10B	-4.16049	0.00666031	4.16049
FIBCD1	1.15164	5.87e-13	1.15164
NELL2	2.45262	0.00333153	2.45262
CAPN14	1.21894	0.0258266	1.21894
TPM4	1.20982	0.00395495	1.20982
C12orf75	1.24175	9.76e-06	1.24175
SHISA9	-1.71976	4e-10	1.71976
CDK6	1.25182	4.48e-10	1.25182
C6orf141	-1.04302	5.09e-11	1.04302
ZBTB8B	3.82247	0.0277947	3.82247
CD8A	1.83449	1.08e-07	1.83449
SLC15A2	1.69377	5.3e-14	1.69377
HRASLS5	3.13885	0.00542006	3.13885
ZNF716	1.32741	5.75e-07	1.32741
B4GALNT2	1.24406	4.2e-10	1.24406
KCNQ5	-1.81516	1.01e-07	1.81516
NFASC	2.09089	1.2e-06	2.09089
PTPRH	1.68787	0.011435	1.68787
MYB	1.0681	0.00057361	1.0681
SULF2	1.52142	0.000637352	1.52142
KIAA0040	1.28524	2.58e-28	1.28524
APBA1	1.89356	1.53e-05	1.89356
PRR29	-1.37153	0.0307507	1.37153
TLCD2	1.05127	9.58e-09	1.05127
ARHGAP40	2.14899	0.00133697	2.14899
GOLGA6L10	-1.21337	0.0268129	1.21337
RAB7B	2.96297	0.00805003	2.96297
FXYD6	-1.87363	3.68e-05	1.87363
SBSN	3.31917	0.00618459	3.31917
TFEB	1.76659	1.6e-12	1.76659
KIAA0319	1.19536	0.0198158	1.19536
ASB9	1.44899	0.0134863	1.44899
SCUBE2	1.19255	1.81e-11	1.19255
PPP1R32	-1.26242	0.000607672	1.26242
CX3CR1	1.48686	0.00468528	1.48686
IL16	-1.21027	6.36e-08	1.21027
AMPD3	2.33744	1.54e-07	2.33744
OLR1	-1.98017	7.38e-18	1.98017
PCDH7	-2.61491	5.76e-56	2.61491
PRRT4	1.65024	0.00369941	1.65024
SLC16A6	2.01797	1.21e-26	2.01797
ARHGDIB	1.36888	3.71e-11	1.36888
HABP2	-2.4152	0.00955332	2.4152
CBS	-1.10148	0.00447753	1.10148
ZC4H2	-3.50001	0.00245184	3.50001
NOX5	1.34394	0.0208873	1.34394
CEACAM1	1.64883	2.04e-09	1.64883
C11orf97	3.45059	0.0168451	3.45059
MCIDAS	-1.02374	0.000645236	1.02374
MGP	2.03876	6.1e-75	2.03876
ERVV-2	3.1842	7.93e-09	3.1842
PLEKHS1	-1.11199	0.00220492	1.11199
NRCAM	4.00557	0.00706575	4.00557
TGFBR3L	1.17638	2.42e-06	1.17638
TMEM178B	3.08379	1.28e-16	3.08379
ASGR1	1.09873	0.0429309	1.09873
EPPIN-WFDC6	2.12248	1.07e-06	2.12248
CYP4F3	2.20128	0.00844303	2.20128
EDA2R	2.15064	6.85e-05	2.15064
CRABP2	1.07598	1.54e-17	1.07598
ATP6V1G2	-1.05172	0.0423556	1.05172
HDAC9	1.74485	0.000152204	1.74485
NPR3	-1.52692	8.7e-16	1.52692
CRISP1	-3.67406	0.0141084	3.67406
IGSF8	1.01959	3.23e-17	1.01959
CA11	1.0995	0.000160449	1.0995
CCNE1	1.10656	1.02e-16	1.10656
HLA-DPA1	1.30953	0.0283524	1.30953
ARHGEF38	-1.0018	2.01e-05	1.0018
SLC22A31	2.8088	3.39e-10	2.8088
HLA-C	1.14977	4.36e-12	1.14977
PIM1	-1.0517	8.09e-10	1.0517
CDON	-1.44341	5.36e-31	1.44341
LMO3	1.4461	3.11e-05	1.4461
STAT4	1.05088	0.0431006	1.05088
HLA-DQB1	1.32276	0.000793878	1.32276
HLA-DRB1	1.03051	0.0014787	1.03051
ENTPD3	1.7239	9.27e-11	1.7239
VIPR1	1.21441	6.47e-29	1.21441
CLPS	2.47994	0.000630926	2.47994
SMIM22	1.15174	0.0343433	1.15174
DGAT2	1.85607	1.12e-22	1.85607
AKR1C3	1.58823	4.79e-06	1.58823
NABP1	1.1938	2.31e-07	1.1938
ALOX5	3.18835	0.00255059	3.18835
ATP1A3	1.6816	9.37e-11	1.6816
CACNA1G	2.34084	0.0141467	2.34084
C12orf79	-1.47781	0.0172314	1.47781
CMPK2	1.43267	0.00894423	1.43267
SLC39A2	1.93786	0.00839028	1.93786
GLMP	1.03897	4.85e-17	1.03897
CDH13	1.24635	0.00120819	1.24635
IKZF3	1.15332	0.00498207	1.15332
CCDC129	2.27388	0.0303654	2.27388
SKOR1	-1.91424	0.0478739	1.91424
TSKU	1.44526	6.39e-18	1.44526
ZNF501	-4.62062	0.0134233	4.62062
PGBD5	1.5789	4.37e-08	1.5789
PAX6	-1.10446	4.79e-06	1.10446
CDSN	2.65129	0.0154689	2.65129
F7	3.00197	1.03e-25	3.00197
EMID1	-1.51864	1.18e-13	1.51864
RTBDN	2.06454	7.97e-05	2.06454
MAOA	1.1908	3.01e-05	1.1908
SREK1	-1.07459	8.55e-06	1.07459
KLF7	-1.09914	8.07e-08	1.09914
HYDIN	4.85813	0.000168738	4.85813
EPGN	4.88563	0.0212394	4.88563
COLCA2	-2.17007	0.00307845	2.17007
CCDC177	1.09408	0.00763023	1.09408
SESN3	2.63585	0.0170354	2.63585
ZNF423	1.35098	0.0353077	1.35098
C5AR2	2.82734	1.63e-36	2.82734
REEP2	-1.01852	9.48e-06	1.01852
LRRC73	1.09684	9.28e-05	1.09684
ITPRIP	1.9174	6.23e-06	1.9174
VWA2	-1.12284	0.00686213	1.12284
TNNT2	1.32086	0.0198279	1.32086
LDLRAD1	1.9994	5.19e-08	1.9994
P2RY6	1.19502	1.61e-07	1.19502
IGSF9B	-1.04077	2.54e-08	1.04077
FMN1	2.16517	1.3e-18	2.16517
L1CAM	2.29168	4.16e-11	2.29168
PIP5K1B	1.74075	0.0339198	1.74075
ACTN2	2.33575	1.9e-05	2.33575
DYNC1I1	1.67093	0.00370259	1.67093
TUBA4A	1.21364	0.0128188	1.21364
AMOTL2	-1.16943	4.64e-15	1.16943
DPF3	1.58573	0.00303859	1.58573
KRT23	-1.19604	2.82e-23	1.19604
LRRC63	2.43661	0.0466432	2.43661
C9orf171	-2.76651	0.0123495	2.76651
CBLL1	1.1677	6.89e-25	1.1677
TMEM40	1.48415	1.71e-07	1.48415
ADCY7	-1.09598	0.0054132	1.09598
KLHL32	-2.39831	0.0374086	2.39831
OLFML3	1.85567	0.0254191	1.85567
TMEM179	1.37177	7.6e-07	1.37177
C14orf180	2.5464	0.0129227	2.5464
CIITA	3.88578	0.0189019	3.88578
ARMC12	1.579	2.48e-07	1.579
SYNPO2	-1.0907	0.00871084	1.0907
UPP1	1.08846	5.13e-05	1.08846
AFAP1L2	1.15902	4.39e-05	1.15902
SMIM1	1.54513	0.000143872	1.54513
IFI27	4.93931	7.09e-26	4.93931
MICB	1.87018	1.36e-16	1.87018
DLD	1.03376	1.97e-09	1.03376
IFIT3	1.34741	0.00117135	1.34741
RARB	-1.20456	0.0269744	1.20456
FAM65C	-1.09223	0.00660092	1.09223
SYT8	2.95132	1.91e-12	2.95132
HSH2D	1.56479	7.32e-10	1.56479
ADPRH	1.82773	1.51e-05	1.82773
SPARCL1	-2.08213	0.00429765	2.08213
PRSS23	2.44192	9.56e-39	2.44192
ALDH1A3	-1.40828	6.92e-25	1.40828
ADGRB2	1.32591	7.89e-21	1.32591
PDE4B	1.52521	0.000975776	1.52521
CD163L1	5.13967	4.86e-07	5.13967
ADGRL2	1.70225	7.56e-11	1.70225
ETNK2	2.25096	8.62e-71	2.25096
USH1C	1.36284	0.000833785	1.36284
METTL15	-1.02759	4.44e-05	1.02759
PCDH18	-2.34711	4.21e-05	2.34711
ABLIM3	1.175	1.1e-10	1.175
CCL28	1.15136	2.35e-28	1.15136
CCDC151	1.44609	1.27e-15	1.44609
COLCA1	-2.33093	9.18e-08	2.33093
C17orf77	2.99015	1.63e-08	2.99015
CYB5R2	1.45936	0.0102283	1.45936
ISG20	1.10558	4.36e-05	1.10558
SLC29A1	1.20639	1.32e-35	1.20639
EPHA4	-3.26544	1.39e-44	3.26544
PAX2	1.73812	3.73e-06	1.73812
STK32B	2.04286	7.39e-22	2.04286
FN1	-2.04924	1.78e-49	2.04924
STXBP5L	1.2734	0.0275634	1.2734
MYO15B	-1.14845	5.88e-09	1.14845
F2R	-1.08118	5.87e-07	1.08118
AKR1C2	2.15945	2.75e-05	2.15945
DNAH6	3.61337	6.61e-08	3.61337
EDA	1.32014	3.28e-07	1.32014
EFNA2	-1.75803	0.0068235	1.75803
EFNB3	-1.71693	1.66e-07	1.71693
MEGF6	1.04152	1.44e-18	1.04152
EMP1	-1.3131	0.00421678	1.3131
EMP3	-1.13802	0.00587862	1.13802
FZD2	-1.01114	6.77e-08	1.01114
GP2	1.47281	0.000163696	1.47281
IFIT2	1.19787	1.11e-05	1.19787
IFIT1	1.6208	7.73e-05	1.6208
IRAK2	1.16831	0.0378446	1.16831
APOD	3.52782	5.49e-15	3.52782
KLK3	3.42979	5.12e-39	3.42979
AREG	1.26331	4.35e-08	1.26331
ARSD	1.6759	2.54e-34	1.6759
ADGRB1	1.84716	4.3e-06	1.84716
C5	-1.27674	6.75e-07	1.27674
CLCN4	1.28372	3.62e-11	1.28372
CLU	2.76964	1.14e-93	2.76964
COL9A3	1.04686	7.97e-13	1.04686
COL15A1	4.15671	0.0476936	4.15671
COL16A1	1.73683	2.02e-07	1.73683
CTGF	-2.66455	0.000852904	2.66455
CTSL	1.06108	9.72e-08	1.06108
DUSP6	1.88263	8.76e-07	1.88263
EDN2	1.60488	4.02e-09	1.60488
EDNRA	3.85985	0.0135989	3.85985
EEF1A2	1.43202	2.85e-42	1.43202
ADGRE1	2.62008	0.0344757	2.62008
ENPEP	3.1383	0.0450462	3.1383
FMO1	1.15867	0.000265144	1.15867
FMO4	1.04405	1.24e-11	1.04405
FUT4	1.2992	8.48e-10	1.2992
IFI6	1.9388	7.06e-09	1.9388
GABRR2	1.84745	0.0113264	1.84745
GPX2	-1.4237	0.00916116	1.4237
CFHR1	-3.95105	0.0279897	3.95105
HLA-A	1.08919	5e-10	1.08919
HLA-DPB1	5.52276	0.000795644	5.52276
HLA-G	1.07055	1.72e-06	1.07055
HMGB2	-1.12793	9.34e-12	1.12793
TNC	5.12576	1.63e-09	5.12576
ID3	1.11542	7.13e-13	1.11542
INSM1	1.17159	5.96e-05	1.17159
ITGAL	1.53164	9.52e-07	1.53164
KCNF1	-1.11892	0.00222851	1.11892
KCNK1	1.58617	6.32e-28	1.58617
KCNN4	2.53046	4.96e-18	2.53046
KIF3C	-1.0882	3.25e-15	1.0882
KLK1	2.23856	0.0015503	2.23856
KRT83	1.59615	0.000638882	1.59615
AFF3	2.50545	4.34e-55	2.50545
LAMA4	1.35688	0.0212213	1.35688
LAMC1	1.51494	5.73e-66	1.51494
LEPR	-1.48025	7.62e-05	1.48025
LIFR	1.13066	2.25e-05	1.13066
LOX	1.70671	0.000711661	1.70671
LTF	3.84802	2.46e-05	3.84802
MGAT3	1.1899	0.0210287	1.1899
MSX1	1.5135	7.11e-09	1.5135
NDN	-4.83397	5.96e-05	4.83397
NGFR	1.71544	3.39e-10	1.71544
NOV	2.3763	3.55e-12	2.3763
NPTX1	-1.19339	0.00159882	1.19339
TNFRSF11B	1.68366	0.00871084	1.68366
PGC	3.04106	0.000419763	3.04106
SERPINB5	4.52925	1.95e-05	4.52925
PIP	1.24626	0.000111067	1.24626
SRGN	2.06185	0.00189163	2.06185
PRKAR2B	2.44733	5.68e-49	2.44733
MAPK4	2.66866	7.14e-07	2.66866
MAPK10	-1.15713	1.84e-12	1.15713
QSOX1	1.56447	1.9e-32	1.56447
PTPRM	2.01132	0.0120702	2.01132
PVALB	2.43286	9.26e-05	2.43286
RASGRF1	-1.18029	0.000298491	1.18029
ROBO2	-1.83583	5.11e-21	1.83583
S100A8	2.04163	1.33e-08	2.04163
S100A9	1.85652	1.79e-20	1.85652
CCL5	1.74151	1.43e-05	1.74151
SLPI	1.89265	3.25e-06	1.89265
SNCG	5.43792	1.79e-38	5.43792
SOX2	-4.66073	3.28e-43	4.66073
TFF3	1.8673	0.00100644	1.8673
TGM3	2.855	1.62e-10	2.855
THRSP	4.77073	5.75e-32	4.77073
TIMP4	2.46636	0.0263383	2.46636
ICAM5	1.17207	0.00214225	1.17207
CLEC3B	1.52059	0.0094609	1.52059
TNNI2	3.29753	0.015997	3.29753
PHLDA2	1.58182	5.5e-20	1.58182
VGF	1.67847	0.0284447	1.67847
WNT5A	2.4359	1.09e-13	2.4359
WNT8B	1.34366	0.00344555	1.34366
CXCR4	2.01167	1.36e-25	2.01167
HIST1H2BC	1.42645	1.08e-13	1.42645
HIST2H2BE	1.01532	8.55e-08	1.01532
HIST1H3B	3.17701	0.000176884	3.17701
HIST1H4H	1.0838	9.79e-08	1.0838
ANXA9	1.17475	8.05e-15	1.17475
LTBP4	1.14019	4.96e-18	1.14019
RDH16	2.26814	1.12e-36	2.26814
OASL	1.90305	3e-12	1.90305
ABCC3	1.04828	1.01e-11	1.04828
TNFSF12	4.40677	0.0156069	4.40677
TNFRSF11A	1.09626	2.32e-13	1.09626
INPP4B	1.44665	2.03e-09	1.44665
SOCS2	2.49749	6.82e-23	2.49749
ST3GAL5	1.38532	1.16e-06	1.38532
DDO	2.51161	4.65e-11	2.51161
CA8	2.02706	6.09e-23	2.02706
CDR1	-1.85327	1.1e-05	1.85327
EMX1	2.52922	1.84e-05	2.52922
GBP2	1.20908	4.19e-08	1.20908
RBP2	1.93513	0.000456565	1.93513
SLC1A1	1.12617	8.89e-08	1.12617
UCHL1	2.01534	4.5e-06	2.01534
GLP2R	2.77897	0.0257694	2.77897
AKAP6	-1.06087	1.58e-06	1.06087
CAMP	3.09367	9.62e-23	3.09367
CRABP1	1.01147	0.00574961	1.01147
ECM1	1.18626	0.00800898	1.18626
EPHB1	-1.44477	0.0180748	1.44477
EPHB2	-1.76346	1.34e-22	1.76346
ETV5	3.26846	9.92e-20	3.26846
GNG4	1.49407	1.99e-11	1.49407
NCAM2	1.06583	0.00820509	1.06583
NRTN	-1.05819	0.0230581	1.05819
PIK3C2G	4.68652	0.00186016	4.68652
SPOCK1	2.58785	7.26e-05	2.58785
TGM2	3.68088	3.61e-13	3.68088
TM4SF4	3.92943	0.0261807	3.92943
WNT11	2.18917	1.76e-07	2.18917
AP3B2	3.10491	0.000135335	3.10491
CLIC3	1.72051	1.34e-29	1.72051
PTGES	1.10222	7.85e-15	1.10222
RAB36	1.86853	1.55e-06	1.86853
KLK4	2.18028	1.93e-28	2.18028
AQP3	2.37622	5.02e-35	2.37622
DOCK3	-1.02438	0.00109981	1.02438
KCND3	1.19421	0.00113099	1.19421
MAGEA1	-1.23588	0.0010112	1.23588
ROR1	1.28229	9.49e-05	1.28229
RORC	1.79307	1.35e-07	1.79307
LGI1	-4.19462	0.0429816	4.19462
ISG15	1.26934	0.00748076	1.26934
TNFSF15	2.27682	0.046657	2.27682
HR	1.05678	2e-24	1.05678
APLP1	1.29378	1.62e-08	1.29378
PPM1J	1.04184	1.07e-08	1.04184
CEBPB	-1.09646	1.08e-07	1.09646
F2RL1	-1.29519	2.03e-15	1.29519
EYA2	-1.46407	3.25e-12	1.46407
FOSL2	-1.00093	2.92e-07	1.00093
GJB5	1.72828	0.0273226	1.72828
MCHR1	2.78712	1.88e-05	2.78712
GPR37	2.16136	6.38e-08	2.16136
HIST1H1C	1.47165	8.86e-28	1.47165
HIST1H1D	1.44792	0.0439908	1.44792
LCK	1.58692	0.00756985	1.58692
MAF	1.38406	0.0474883	1.38406
MAGEA3	-7.18099	4.45e-08	7.18099
MAGEA6	2.49794	2.23e-11	2.49794
MAGEA12	-3.12035	0.017914	3.12035
PPP1R3C	1.96102	2.08e-14	1.96102
VEGFC	2.11626	3.73e-06	2.11626
HLA-B	1.19102	3.1e-13	1.19102
HMGCS2	1.41956	0.000305674	1.41956
IFI16	2.53805	5.38e-13	2.53805
IVL	1.50212	6.93e-07	1.50212
KLK2	3.97296	2.41e-67	3.97296
KRT16	1.69974	0.000852009	1.69974
LAD1	1.25868	6.83e-19	1.25868
LAMC2	1.1318	0.00160916	1.1318
LGALS3BP	1.11311	1.02e-06	1.11311
SLCO2A1	1.38637	1.71e-07	1.38637
NR2F1	1.18302	1.09e-09	1.18302
TSPAN1	-1.08709	1.29e-11	1.08709
PPIF	1.13822	1.21e-24	1.13822
CLEC3A	2.491	2.95e-61	2.491
MAN1A1	3.1175	1.12e-145	3.1175
MAP1B	3.37076	7.38e-41	3.37076
S100A2	1.58549	0.00148421	1.58549
S100P	1.89109	1.35e-05	1.89109
LIPG	3.16781	0.0117549	3.16781
WFDC2	2.56658	3.32e-36	2.56658
OAS3	1.4048	1.85e-12	1.4048
S100A1	1.40488	5.2e-10	1.40488
TRIM38	2.57501	5.08e-06	2.57501
IFI44	1.21884	0.00144469	1.21884
CXCL13	2.7253	2.44e-22	2.7253
COLEC10	2.17748	0.0111104	2.17748
TXNIP	1.03461	4.61e-08	1.03461
RASL10A	-1.0321	0.000248881	1.0321
CLCA2	3.03423	4.89e-14	3.03423
IGF2BP2	3.16857	8.24e-26	3.16857
PLK2	-1.24401	1.22e-21	1.24401
IQGAP2	2.1193	2.28e-06	2.1193
SPINT3	2.92719	5.72e-06	2.92719
CYP46A1	2.04378	0.00224532	2.04378
PPP1R1A	3.15055	0.000831596	3.15055
RBP4	2.42542	6.63e-10	2.42542
SIPA1	3.17401	2.88e-35	3.17401
IFI44L	2.51677	7.93e-05	2.51677
ADIRF	2.4644	1.3e-69	2.4644
GMPR	1.6286	1.64e-09	1.6286
PAGE4	4.80758	0.0310487	4.80758
ADAMTS8	1.27474	0.00176435	1.27474
CAPN11	3.37847	0.000411056	3.37847
FSTL1	-1.46517	3.72e-28	1.46517
ZNF208	2.10231	4.96e-07	2.10231
DUSP10	1.12944	1.27e-10	1.12944
NXPH3	1.48199	0.000115404	1.48199
CYP4F8	1.96993	1.36e-22	1.96993
GNA12	1.02936	8.87e-41	1.02936
ELL2	1.22841	4.29e-13	1.22841
TMEM59L	1.58084	0.0105242	1.58084
FOXD4L1	-3.88763	0.0396921	3.88763
FZD4	1.03884	1.33e-30	1.03884
HAAO	1.90215	0.00149771	1.90215
MYO1B	-1.14342	1.27e-18	1.14342
KCNG2	2.45808	0.00384081	2.45808
MAPK8IP2	2.28457	1.61e-13	2.28457
TSPAN12	1.16649	8.12e-07	1.16649
BAMBI	-1.49145	2.3e-25	1.49145
SEMA3E	1.56679	7.17e-08	1.56679
C2orf27A	1.81357	0.0300636	1.81357
NCF4	3.27296	0.0103459	3.27296
GGT1	1.47044	3e-17	1.47044
SLC6A16	-1.0974	0.00667574	1.0974
PSORS1C2	2.2434	0.0467437	2.2434
KLF15	1.78782	2.1e-07	1.78782
FXYD5	1.08125	1.12e-12	1.08125
B3GNT3	1.90457	2.46e-07	1.90457
P3H3	1.28442	2.98e-13	1.28442
DAPK2	-1.12039	5.83e-11	1.12039
SLC7A11	-1.07769	0.0034205	1.07769
CADM1	1.03693	1.02e-14	1.03693
HSPB8	3.53839	1.83e-61	3.53839
KCNV1	1.18625	0.00353949	1.18625
DAPP1	1.57578	0.0023788	1.57578
CNTN6	-1.55792	2.42e-10	1.55792
KCNMB4	3.08265	3.07e-15	3.08265
SLC40A1	-1.13616	1.18e-13	1.13616
ATP11B	-1.39738	2.96e-13	1.39738
BRINP1	1.03308	0.000385786	1.03308
S100A6	1.5351	2.46e-38	1.5351
SH3PXD2A	-1.46306	2.91e-06	1.46306
RASSF2	-1.97486	0.00376512	1.97486
TRANK1	1.09906	8.22e-05	1.09906
ARNT2	-1.41454	2.52e-27	1.41454
PPM1E	1.31301	3.48e-06	1.31301
ARSG	1.16861	2.71e-12	1.16861
MLC1	2.31477	0.0276716	2.31477
SYNE2	-1.01186	0.000623604	1.01186
KIAA1024	-1.86054	7.62e-05	1.86054
ADGRL3	2.63103	0.00392602	2.63103
CUX2	-1.48261	1.12e-08	1.48261
PARM1	1.72084	4.37e-13	1.72084
MXRA5	-4.72326	9.41e-18	4.72326
TRIM58	2.90083	0.0377274	2.90083
LRIG1	-1.14923	1.09e-16	1.14923
ACOT11	1.81749	8.9e-07	1.81749
PI15	-2.83688	3.67e-09	2.83688
ZMYND10	-1.01915	0.000110839	1.01915
PTPN22	3.14103	0.000797942	3.14103
GAL	1.01829	7.63e-08	1.01829
RHCG	2.19456	2.06e-09	2.19456
CPA4	1.34626	3.05e-06	1.34626
ZDHHC2	2.83434	0.000117713	2.83434
HSD17B7	1.0504	5.46e-07	1.0504
VCX3A	2.49602	9.28e-05	2.49602
SYT17	-1.18033	7.16e-18	1.18033
SLC15A3	1.25061	4.43e-06	1.25061
PLAC8	3.86685	0.023424	3.86685
FOLR1	2.76908	0.0359144	2.76908
OAS2	1.51783	0.000142558	1.51783
USP18	1.00599	2.32e-06	1.00599
MFAP2	-2.4069	2.93e-22	2.4069
EPDR1	2.60922	1.44e-31	2.60922
SLC43A3	-2.03226	3.78e-12	2.03226
SAMD9	1.69314	2.04e-07	1.69314
NUP62CL	3.86539	0.010744	3.86539
FAM46C	1.41878	1.41e-41	1.41878
ELOVL2	6.82186	2.07e-07	6.82186
FLVCR2	1.0578	9.44e-06	1.0578
DUSP23	1.14641	1.89e-24	1.14641
HRASLS2	1.05775	4.38e-05	1.05775
WIPI1	1.42881	1.66e-26	1.42881
TMEM45A	2.05748	1.33e-07	2.05748
MBD5	-1.23208	3.59e-10	1.23208
LRRN3	1.47907	0.0291154	1.47907
CACNA2D3	5.32484	0.000749964	5.32484
SLC22A15	1.47046	2.09e-08	1.47046
ARHGAP15	1.02712	0.0323806	1.02712
GABRQ	-1.21874	3.21e-28	1.21874
CAMK2N1	1.0079	5.36e-16	1.0079
TRIM36	1.39302	9.04e-07	1.39302
BCAP29	1.39145	9.59e-16	1.39145
ABCB4	1.14488	0.00696823	1.14488
DNAH7	-1.02827	0.0324095	1.02827
PCDHA1	1.46592	6.4e-25	1.46592
PCDHA7	1.13562	0.0185074	1.13562
PCDHGA2	1.20584	0.000313099	1.20584
PCDHGA3	1.54663	0.016692	1.54663
PCDHB10	1.02577	0.0186931	1.02577
PCDHB11	1.60345	4.34e-07	1.60345
PCDHB12	1.26817	0.00045927	1.26817
HOXA10	2.89105	7.78e-06	2.89105
SPIN2A	-4.17622	0.0326917	4.17622
KRT24	4.13052	0.0102283	4.13052
APBB1IP	3.95168	1.02e-09	3.95168
USP53	-1.13036	7.01e-06	1.13036
NECAB2	2.06039	0.00122729	2.06039
MAP10	1.25682	0.00878962	1.25682
S100A4	1.54786	6.82e-12	1.54786
RPRM	1.77656	1.33e-05	1.77656
CYP26B1	1.28773	0.049305	1.28773
TMEM63C	2.42864	1.08e-54	2.42864
JPH2	-1.02564	5.88e-12	1.02564
ATP8B2	1.04911	5.51e-14	1.04911
RCN3	-2.20727	2.67e-06	2.20727
ZNF608	-1.04962	1.03e-05	1.04962
STARD9	-1.12867	0.0141491	1.12867
HECW2	1.61423	7.53e-05	1.61423
SRGAP1	-1.32044	1.65e-32	1.32044
PCDH19	-2.0866	3.63e-06	2.0866
PTCHD2	1.60915	2.51e-07	1.60915
ZNF492	2.03545	0.000167067	2.03545
SH3RF1	-1.13088	1.25e-29	1.13088
LRRN1	1.12922	3.51e-08	1.12922
DNAH2	1.07689	0.00158521	1.07689
VAT1L	2.94739	0.00783216	2.94739
SPTBN4	1.35617	8.21e-11	1.35617
GBA3	2.796	5.77e-12	2.796
RET	1.81719	4.87e-25	1.81719
NMB	-1.18304	7.19e-05	1.18304
DNASE2B	2.36914	1.12e-05	2.36914
MID1IP1	1.03217	9.41e-24	1.03217
PELI2	-2.89887	0.0249728	2.89887
KCNN2	1.93898	0.00209005	1.93898
TRPV4	-1.34628	0.00359077	1.34628
MFAP3L	1.52378	3.95e-12	1.52378
PLAC1	1.43995	0.000143835	1.43995
DNAJC12	1.35024	2.01e-07	1.35024
ELOVL5	1.39142	3.96e-34	1.39142
HAPLN2	2.05961	0.00102096	2.05961
CCDC81	3.03001	2.85e-08	3.03001
BCAN	1.93945	8.4e-12	1.93945
GJA3	-4.32466	0.00529031	4.32466
HLX	3.4017	0.00876717	3.4017
PGM5	-2.68506	6.31e-08	2.68506
KCNK13	1.55775	7.71e-08	1.55775
CLSTN2	1.2426	1.65e-13	1.2426
NOD2	1.09725	0.00732183	1.09725
RAB38	1.61005	0.0203723	1.61005
KCNK15	1.30062	8.5e-05	1.30062
EDDM3B	1.97366	0.0169775	1.97366
SLC6A20	2.5848	1.06e-06	2.5848
GREM2	-1.13402	0.00191453	1.13402
CLEC7A	1.63012	0.00963132	1.63012
2025-03-01	1.14699	5.67e-17	1.14699
FNDC4	-1.54332	0.00498706	1.54332
PLEKHG2	-1.34423	9.92e-13	1.34423
FGFR3	1.25269	8.08e-18	1.25269
GPR87	-2.11774	0.0474816	2.11774
C1orf116	1.462	2.49e-09	1.462
TMEM108	3.55968	0.0203063	3.55968
CYP4F12	2.42245	0.00278311	2.42245
GJB3	1.12361	0.0187277	1.12361
METRN	1.2111	4.69e-27	1.2111
LRRC2	-4.15042	0.0145841	4.15042
CHPF	1.26105	8.17e-23	1.26105
NDNF	1.89861	0.000141691	1.89861
MSANTD2	-1.14215	5.28e-07	1.14215
LIN28A	5.60963	6.86e-65	5.60963
HHIPL2	2.25346	5.53e-11	2.25346
MMRN2	1.99806	5.32e-08	1.99806
MOB3B	1.1558	0.042065	1.1558
EFCC1	1.54045	1.49e-09	1.54045
AGBL2	-1.03526	6.7e-05	1.03526
CPED1	2.8019	3.83e-06	2.8019
POF1B	3.69149	5.92e-23	3.69149
CES3	1.06828	0.00147088	1.06828
FRAS1	-1.60092	0.000366119	1.60092
MOGAT2	2.84846	2.97e-05	2.84846
ATP10B	1.54081	5.78e-05	1.54081
PLXNA2	2.82277	2.05e-19	2.82277
MTERF2	-1.39953	1.3e-16	1.39953
BPIFB2	2.0987	0.0231076	2.0987
TET1	-1.08275	1.11e-08	1.08275
BHLHE41	3.21651	4.44e-11	3.21651
CFHR5	3.75277	0.0285821	3.75277
FAM49A	1.51778	0.000103604	1.51778
ACTL8	1.81653	2.04e-09	1.81653
LBH	-5.27884	0.00730981	5.27884
TMEM163	1.29387	0.00322059	1.29387
C1QTNF3	-1.85747	0.00873093	1.85747
SPRY4	3.2522	1.35e-12	3.2522
TTC25	-1.10096	0.0283959	1.10096
FZD8	1.21026	0.000593322	1.21026
MYCBPAP	1.77105	0.0332426	1.77105
PPP1R1B	2.43278	5.52e-10	2.43278
ANTXR1	-1.08676	3.77e-15	1.08676
SLITRK6	3.56472	0.0266951	3.56472
ATP13A4	2.59021	1.01e-27	2.59021
PROK1	4.94586	0.0407129	4.94586
FBN3	-1.16334	0.00173805	1.16334
MFSD2A	1.64216	3.24e-08	1.64216
ATOH8	2.6421	1.09e-06	2.6421
CORO6	1.11081	0.0162727	1.11081
TNS4	1.17326	0.000883327	1.17326
UBASH3B	-1.78347	3.16e-10	1.78347
COL27A1	-1.64132	1.83e-08	1.64132
SLC45A3	1.54455	4.45e-22	1.54455
NKD1	1.79685	8.47e-09	1.79685
CALD1	1.05351	7.48e-05	1.05351
BOC	-1.25772	4.44e-24	1.25772
EPSTI1	1.24876	0.00114752	1.24876
MID1	-1.09746	1.45e-08	1.09746
CNTNAP4	3.47718	0.013301	3.47718
DISP2	-1.069	2.99e-05	1.069
CDH7	3.88858	0.0159923	3.88858
GNG7	-1.30762	1.4e-05	1.30762
NALCN	2.19893	3.02e-08	2.19893
PKD1L2	2.11208	0.00165319	2.11208
RNF157	-1.53865	2.83e-13	1.53865
KLHL29	4.33778	0.00337256	4.33778
PANX3	-2.07164	0.0170698	2.07164
LRG1	1.636	0.000706331	1.636
CLIC6	1.5508	7.38e-09	1.5508
TRIM6	1.90405	8.13e-08	1.90405
WNT7B	-1.1914	6.75e-22	1.1914
VSTM2L	1.76138	1.22e-05	1.76138
CCM2L	1.50876	4.59e-07	1.50876
RSAD2	1.89773	4.2e-11	1.89773
COL11A2	1.02879	3.52e-07	1.02879
COL13A1	1.64893	0.00147425	1.64893
WFDC6	1.83725	1.74e-21	1.83725
SPSB4	-1.62827	8.4e-06	1.62827
AGAP11	1.74329	0.000155651	1.74329
COL26A1	-1.55396	0.0101932	1.55396
AMZ1	1.67246	7.85e-21	1.67246
BMPER	-1.30908	0.034485	1.30908
PKD1L1	1.94254	1.02e-27	1.94254
TMEM44	-1.47103	1.16e-21	1.47103
KIF12	1.3335	0.0119073	1.3335
KCTD12	1.02026	0.000416635	1.02026
ZNF689	1.66059	1.13e-47	1.66059
BATF2	1.69086	0.00350395	1.69086
TMC1	-4.22209	0.0217609	4.22209
PKHD1	1.17997	2.23e-05	1.17997
HEPH	3.27232	9e-11	3.27232
MYEOV	1.71292	0.00209005	1.71292
ESAM	-1.07254	0.000770805	1.07254
SDR16C5	1.08318	1.9e-05	1.08318
OLIG1	2.97479	0.002357	2.97479
HOPX	1.89127	2.96e-06	1.89127
GAS2L2	3.36133	0.0432323	3.36133
BIRC7	2.09618	0.00159732	2.09618
BIN1	1.22877	4.72e-05	1.22877
KLK8	4.74089	0.000465606	4.74089
SFXN5	1.03049	4.29e-12	1.03049
ATP6V1C2	1.22259	5.23e-08	1.22259
RFTN2	-1.98076	0.0123599	1.98076
CAPSL	1.77166	0.000781388	1.77166
PXDNL	4.04571	0.0256414	4.04571
EFHB	2.36204	0.0222603	2.36204
TMEM106A	1.04344	0.0186027	1.04344
STAC3	-1.11337	0.0126022	1.11337
APOL1	1.37427	0.00604327	1.37427
SYNM	-2.43898	2.88e-35	2.43898
ISL2	-1.14934	0.00611786	1.14934
UBXN10	-1.27217	0.0121866	1.27217
SGPP2	1.31744	0.00965195	1.31744
ZNF572	-1.05275	1.68e-08	1.05275
MUM1L1	-1.69384	5.77e-05	1.69384
PIWIL4	1.34315	0.0357829	1.34315
FGD5	1.66358	1.03e-05	1.66358
METTL7B	1.51915	0.00365538	1.51915
KNDC1	2.16828	0.000746343	2.16828
SAMD9L	1.67372	0.000938313	1.67372
TBATA	4.16221	0.00927312	4.16221
CPNE2	-1.01129	1.23e-11	1.01129
BEND6	1.02254	0.0119001	1.02254
AKNAD1	2.0203	0.0189814	2.0203
C8orf46	-2.0743	0.00222294	2.0743
APCDD1	2.7657	1.02e-12	2.7657
FBLN7	-1.00704	0.0208773	1.00704
TXLNB	1.22177	1.38e-05	1.22177
C6orf223	2.32976	0.0197233	2.32976
BEST4	-2.71866	0.00985118	2.71866
TMEM86A	1.67119	2.61e-21	1.67119
SVEP1	-4.22141	0.00302811	4.22141
HS6ST3	1.35966	4.9e-12	1.35966
CSAG1	-2.75889	0.00148273	2.75889
ZNF114	-1.8952	1.62e-07	1.8952
RTP1	-1.06828	0.0106936	1.06828
ADGRF4	3.68087	0.0193144	3.68087
SH2D3C	1.84483	0.0179461	1.84483
PLEKHH2	-1.5842	1.75e-07	1.5842
IFNL1	3.07918	0.0230269	3.07918
IL15	1.95237	0.0464575	1.95237
SCUBE1	2.36162	0.0154863	2.36162
PTK2B	1.07471	3.69e-13	1.07471
MISP	1.14803	5.02e-22	1.14803
ANKRD29	2.65441	0.000497618	2.65441
MCMDC2	-1.69233	0.000737023	1.69233
C3orf58	1.98862	7.11e-76	1.98862
IGSF22	1.25391	0.0040558	1.25391
FAM133A	3.36736	9.76e-31	3.36736
UGT3A2	1.12167	1.53e-06	1.12167
HIST4H4	1.52198	0.0100121	1.52198
ZPLD1	5.68186	0.00296395	5.68186
HIST2H2AB	2.0028	0.0305143	2.0028
GRIK2	-2.11937	0.0360185	2.11937
CHSY3	1.14208	0.00966801	1.14208
TMTC1	3.49079	0.0049366	3.49079
PRR15	1.18383	3.1e-12	1.18383
NHLRC4	1.38197	0.0240775	1.38197
FAM171B	1.02665	4.83e-06	1.02665
BHLHA15	3.41911	1.85e-05	3.41911
TUBB2B	1.36162	0.0115217	1.36162
PRIMA1	-1.16519	8.23e-10	1.16519
SESTD1	-1.05441	3.98e-14	1.05441
NAT8L	1.05039	7.25e-07	1.05039
FBXO27	1.11471	8.85e-22	1.11471
IGSF10	-5.33283	0.000426985	5.33283
C1orf64	3.55646	0.0272029	3.55646
CMTM8	1.21064	9.34e-12	1.21064
CCDC39	-1.09959	0.00495992	1.09959
PIFO	1.47678	1.42e-08	1.47678
ASPHD1	1.55916	1.97e-14	1.55916
COG5	1.10567	3.63e-19	1.10567
FFAR4	1.77636	0.00260081	1.77636
STARD5	-1.20272	7.38e-17	1.20272
MYRFL	2.75534	1.7e-14	2.75534
LHFPL5	2.27001	3.67e-05	2.27001
THEM5	1.26093	0.00631299	1.26093
ZNF454	1.39006	0.0209088	1.39006
C2orf48	-1.2534	0.00274315	1.2534
DLC1	1.18309	0.0105242	1.18309
WDR72	-1.5447	0.00030629	1.5447
SCARA3	2.96419	5.75e-42	2.96419
PLAC4	-1.01948	0.0145754	1.01948
HPN	-3.19436	1.68e-48	3.19436
TRIM55	2.53569	0.0373405	2.53569
GPRIN3	2.38953	0.00391257	2.38953
GOLT1A	1.46903	9.45e-13	1.46903
EMB	4.00011	0.00714255	4.00011
ANKRD45	2.34434	0.0156313	2.34434
ZFP69	-1.08548	0.00496961	1.08548
ATP13A5	1.78233	0.0451762	1.78233
GALNT18	1.11437	1.66e-15	1.11437
ENHO	-3.86767	8.03e-06	3.86767
STAC2	1.98693	7.16e-21	1.98693
BRINP3	3.86571	0.0104389	3.86571
TPTE	2.39743	0.00468981	2.39743
CLDN8	1.18948	1.32e-11	1.18948
ZNF365	2.32533	0.0469505	2.32533
GAS7	-1.34249	3.08e-12	1.34249
SEZ6L2	1.40804	5.38e-32	1.40804
IYD	1.72988	0.0324095	1.72988
DEGS2	1.66473	8.6e-31	1.66473
FAM83A	2.18868	0.0030676	2.18868
ZNF580	-1.14794	1.1e-17	1.14794
ADAM15	1.0984	8.54e-25	1.0984
CCDC64	1.21764	1.72e-24	1.21764
C2CD4A	2.02356	4.36e-05	2.02356
CYP4V2	-1.03178	5.77e-10	1.03178
NCKAP5	1.17528	0.00184339	1.17528
GPR153	1.08802	3.49e-11	1.08802
C15orf52	-1.69181	0.00282923	1.69181
TNFAIP8L3	1.20224	1.47e-05	1.20224
CLPSL2	2.10932	1.2e-05	2.10932
