# Supplementary material for: A tumor-agnostic, topology-informed scoring framework for drug repurposing: application to CDK4/6 inhibitor resistance in HR+ breast cancer
Source: Research Square preprint supplement (doi:10.21203/rs.3.rs-6447930/v1), 2025-05-06
Supplement: Supplementary file 11 [file 94091880b53fb521bd784553.xlsx]

## Sheet: Sheet1
Table S3
Details of Sorafenib Matching Results
Gene	Target Importance	Standard Value(nM)	Log2FC	Effective Type
BLK	2.37	794.33	-6.15	Suppress
EPHA2	7.32	794.33	-3.56	Suppress
LYN	13.2	398.11	-4.8	Suppress
FGFR3	7.5	1258.93	1.2	Suppress
FLT3	5.41	2	2.75	Suppress
MAOA	4.63	8258.3	-5.21	Suppress
KIT	19.18	11	-1.62	Suppress
