# Supplementary material for: A tumor-agnostic, topology-informed scoring framework for drug repurposing: application to CDK4/6 inhibitor resistance in HR+ breast cancer
Source: Research Square preprint supplement (doi:10.21203/rs.3.rs-6447930/v1), 2025-05-06
Supplement: Supplementary file 12 [file c08fb22b57b3b2f60aa4fc2f.xlsx]

## Sheet: Sheet1
Table S2
List of predictive drugs that are effective in the CDK4/6 inhibitor dataset after drug target mapping
MCF7_GSE222367	T47D_GSE222367	PDX_GSE229235	MCF7_Lab
DASATINIB	DASATINIB	DASATINIB	TOZASERTIB
CEDIRANIB	ISOLIQUIRITIGENIN	TAMOXIFEN	NILOTINIB
TOZASERTIB	SUNITINIB	VANDETANIB	CERITINIB
VANDETANIB	SORAFENIB	ENTRECTINIB	PONATINIB
DUVELISIB	DIETHYLSTILBESTROL	CEDIRANIB	GEFITINIB
NILOTINIB	IMATINIB	ERLOTINIB	ERLOTINIB
CERITINIB	MITOXANTRONE	PONATINIB	SORAFENIB
BOSUTINIB	PAZOPANIB	PAZOPANIB	CABOZANTINIB
IBRUTINIB	NILOTINIB	SORAFENIB	OSIMERTINIB
TIRBANIBULIN	CELECOXIB	PALBOCICLIB	AFATINIB
PAZOPANIB	DAUNORUBICIN	BOSUTINIB	CRIZOTINIB
SUNITINIB	DOXORUBICIN	TOZASERTIB	LAPATINIB
SORAFENIB	SELINEXOR	NILOTINIB	NERATINIB
DIETHYLSTILBESTROL	ETHINYL ESTRADIOL	IDELALISIB	MIDOSTAURIN
ISOLIQUIRITIGENIN	PACLITAXEL	ABEMACICLIB	VENETOCLAX
MITOXANTRONE	MASOPROCOL	GEFITINIB	QUIZARTINIB
PACLITAXEL	QUIZARTINIB	ISOLIQUIRITIGENIN	DIETHYLSTILBESTROL
IMATINIB	BOSUTINIB	CABOZANTINIB	PAZOPANIB
ALECTINIB	PONATINIB	QUIZARTINIB	ERDAFITINIB
ETHINYL ESTRADIOL	EPIRUBICIN	DINACICLIB	TOFACITINIB
BELINOSTAT	BELINOSTAT	ALVOCIDIB	NINTEDANIB
DOXORUBICIN	BEXAROTENE	OSIMERTINIB	LORLATINIB
QUIZARTINIB	AMSACRINE	PACLITAXEL	MEDROXYPROGESTERONE ACETATE
PHENTOLAMINE	SIROLIMUS	FULVESTRANT	INFIGRATINIB
CRIZOTINIB	IDELALISIB	TOFACITINIB	FUTIBATINIB
INDIRUBIN	VINBLASTINE	AFATINIB	AMSACRINE
VINBLASTINE	VINCRISTINE	RALOXIFENE HYDROCHLORIDE	DAUNORUBICIN
VINBLASTINE SULFATE	CERITINIB	RIBOCICLIB	MASOPROCOL
DOCETAXEL	REGORAFENIB	RUXOLITINIB	RUXOLITINIB
VINCRISTINE	PEXIDARTINIB	FILGOTINIB	UPADACITINIB
VINORELBINE	TRETINOIN	ALPELISIB	BARICITINIB
EMBELIN	VINBLASTINE SULFATE	MITOXANTRONE	FILGOTINIB
DINACICLIB	DOCETAXEL	DOXORUBICIN	PLERIXAFOR
LORLATINIB	VINORELBINE	DUVELISIB	ENZALUTAMIDE
	TIRBANIBULIN	LAPATINIB	SIROLIMUS
	TRANYLCYPROMINE HYDROCHLORIDE	CISPLATIN	LEFLUNOMIDE
	CROCIN	CERITINIB	THIOTEPA
	IDARUBICIN	BORTEZOMIB	DINACICLIB
	ALITRETINOIN	BELINOSTAT	PHENTOLAMINE
	THIOGUANINE	BARICITINIB	PEXIDARTINIB
	AMINOGLUTETHIMIDE	ALECTINIB	FLUTAMIDE
	EVEROLIMUS	IBRUTINIB	CHLOROPYRAMINE
	SORAFENIB TOSYLATE	ACALABRUTINIB	IDARUBICIN
	AMRUBICIN	NERATINIB	BEXAROTENE
	MELPHALAN	INDIRUBIN	GILTERITINIB
	ENASIDENIB	ADAGRASIB	ALVOCIDIB
	PHENTOLAMINE	ASCIMINIB	APALUTAMIDE
	CAMPTOTHECIN	ROCILETINIB	CAMPTOTHECIN
		DACOMITINIB	VEMURAFENIB
		AFATINIB DIMALEATE
		CRIZOTINIB
		ULIPRISTAL ACETATE
		SELINEXOR
		IXAZOMIB
		VENETOCLAX
		AXITINIB
		DABRAFENIB
		COPANLISIB
		TRILACICLIB
		LORLATINIB
		INFIGRATINIB
		UPADACITINIB
		BICALUTAMIDE
		CARFILZOMIB
		MASOPROCOL
		ENZALUTAMIDE
		NILUTAMIDE
		ZANUBRUTINIB
		CELECOXIB
		APALUTAMIDE
		ENASIDENIB
		VINBLASTINE
		VINCRISTINE
		ENTINOSTAT
		GILTERITINIB
		METHOTREXATE
		VORINOSTAT
		PLERIXAFOR
		VINBLASTINE SULFATE
		DOCETAXEL
		VINORELBINE
		TIRBANIBULIN
		SIROLIMUS
		PHENTOLAMINE
		PANOBINOSTAT
		EMBELIN
		FLUPIRTINE MALEATE
		THIOGUANINE
		MELPHALAN
		MYCOPHENOLIC ACID
		AMSACRINE
		THIOTEPA
		PEMETREXED
