# Supplementary material for: A tumor-agnostic, topology-informed scoring framework for drug repurposing: application to CDK4/6 inhibitor resistance in HR+ breast cancer
Source: Research Square preprint supplement (doi:10.21203/rs.3.rs-6447930/v1), 2025-05-06
Supplement: Supplementary file 13 [file d9f73ba770e6ec4d6b5cb208.xlsx]

## Sheet: Sheet1
Talbe S1
Validation results of each dataset and ranking information of drugs to be tested
Dataset	Cell Lines	Drugs	Actual Effect	Predictive Accuracy	Relative Ranking	Relative Ranking(%)
GSE129221	PC9	Gefitinib	Resistance	Yes	41/118	34.75
GSE129221	PC9	Apatinib	Sensitive	No	Haven't Seen	NA
GSE200029	T47D	Tamoxifen	Resistance	Yes	6/142	4.23
GSE200029	T47D	Erdatinib	Sensitive	Yes	41/142	28.87
GSE268699	MCF7	Palbociclib	Resistance	Yes	47/56	83.93
GSE268699	MCF7	Fulvestrant	Resistance	Yes	2/162	1.23
GSE268699	T47D	Palbociclib	Resistance	No	42/71	59.15
GSE268699	T47D	Fulvestrant	Resistance	No	Haven't Seen	NA
GSE62504	HCC827-BR1	Afatinib	Resistance	Yes	4/130	3.08
GSE62504	HCC827-BR1	Dasatinib	Sensitive	Yes	4/130	3.08
GSE62504	HCC827-BR2	Afatinib	Resistance	Yes	6/130	4.62
GSE62504	HCC827-BR2	Dasatinib	Sensitive	No	59/130	45.38
