# Supplementary material for: A tumor-agnostic, topology-informed scoring framework for drug repurposing: application to CDK4/6 inhibitor resistance in HR+ breast cancer
Source: Research Square preprint supplement (doi:10.21203/rs.3.rs-6447930/v1), 2025-05-06
Supplement: Supplementary file 14 [file dd7617eb493c2189c77bf1c6.xlsx]

## Sheet: Sheet1
Gene	log2FoldChange	padj	absLogFC
A2M	1.71479	0.0360434	1.71479
ADA	-1.45154	6.11e-08	1.45154
AGT	-4.77048	0.00464563	4.77048
AGXT	-5.50063	0.00189592	5.50063
ALAD	1.14342	3.26e-31	1.14342
ABCD1	2.76666	7.8e-124	2.76666
ASS1	-2.51194	5.64e-119	2.51194
ATM	-1.07624	1.42e-05	1.07624
BCHE	3.82165	1.62e-22	3.82165
BRCA2	1.88737	1.99e-09	1.88737
C3	1.88494	1.01e-06	1.88494
CAPN3	-4.25744	6.63e-07	4.25744
CNGA1	-2.8447	6.04e-08	2.8447
COL1A1	1.00961	1.3e-15	1.00961
COL7A1	-1.66586	2.61e-15	1.66586
CP	-1.85566	0.00789788	1.85566
CYBA	4.27266	0.00432104	4.27266
CYP1B1	1.18594	1.15e-19	1.18594
DPYD	8.99225	3.99e-17	8.99225
SLC26A2	-3.54424	2.23e-77	3.54424
EPOR	1.05854	1.21e-11	1.05854
FGFR2	3.25652	3.92e-93	3.25652
GAMT	3.57332	4.02e-58	3.57332
GBE1	1.14863	2.48e-14	1.14863
GHR	4.46917	8.24e-299	4.46917
GJA1	-7.01276	6.34e-11	7.01276
GLI3	1.48962	1.99e-50	1.48962
GLDC	-2.87645	1.12e-14	2.87645
CFH	3.58244	0.00161365	3.58244
HGD	-3.97502	1.99e-74	3.97502
TBX5	-3.36231	0.0338459	3.36231
SHH	-1.63891	0.00601372	1.63891
HSD11B2	1.56851	1.14e-12	1.56851
IDUA	-2.13405	1.32e-35	2.13405
ITGB3	2.07689	0.0363097	2.07689
ITGB4	2.52275	5.6e-176	2.52275
JAG1	2.27072	9.48e-61	2.27072
JAK3	-1.9176	4.65e-15	1.9176
ANOS1	2.06352	3.1e-44	2.06352
LAMB3	1.93001	9.65e-16	1.93001
LIG1	1.42452	5.87e-23	1.42452
LIPA	1.51131	6.95e-41	1.51131
MYO7A	3.36558	7.74e-19	3.36558
NAGLU	1.32533	6.69e-36	1.32533
NDP	5.55818	4.32e-13	5.55818
NF2	1.33104	6.84e-38	1.33104
GPR143	1.39508	2.16e-07	1.39508
PAH	-5.83477	3.86e-05	5.83477
PDE6B	1.10319	0.000474874	1.10319
PEX6	-1.08451	3.95e-26	1.08451
PKP1	4.36696	1.71e-130	4.36696
PMP22	8.569	0	8.569
PROS1	-1.96948	2.24e-14	1.96948
ROM1	1.07133	5.59e-05	1.07133
SCNN1B	-2.05064	5.16e-10	2.05064
SOX9	3.58421	1.86e-78	3.58421
ABCA4	4.60585	3.14e-23	4.60585
STS	1.56535	2.84e-49	1.56535
TAT	-2.49175	0.0152308	2.49175
TGFBI	-2.33015	4.56e-10	2.33015
THBD	-2.59812	7.2e-24	2.59812
TIMP3	2.52012	2.59e-66	2.52012
TPMT	1.47553	2.25e-25	1.47553
VDR	1.1289	5.8e-27	1.1289
SLC25A20	1.24791	4.61e-27	1.24791
COL5A2	1.97631	1.37e-14	1.97631
CSF2RB	5.18006	0.00045889	5.18006
CTSK	1.06514	0.00119801	1.06514
CYB5R3	1.24244	8.62e-35	1.24244
KRT17	2.08996	6.68e-16	2.08996
LTBP2	-2.21163	1.5e-35	2.21163
MAT1A	-9.7386	4.81e-15	9.7386
PAFAH1B1	1.05047	1.72e-59	1.05047
MVK	1.36882	3.53e-09	1.36882
OXCT1	1.38297	1.89e-32	1.38297
PDE6A	-4.28433	4.34e-13	4.28433
PHEX	1.53198	1.91e-13	1.53198
RAG1	-3.56327	6.52e-05	3.56327
AK1	1.21207	3.7e-21	1.21207
COL4A5	3.38529	1.03e-204	3.38529
EPX	-1.56396	0.0165503	1.56396
GALNS	1.11792	7.22e-18	1.11792
GDNF	2.32218	0.0476517	2.32218
KRT14	4.47651	0.000120332	4.47651
RFXAP	-1.32007	1.97e-12	1.32007
SMPD1	1.50972	5.38e-21	1.50972
TYRP1	-5.67612	7.64e-06	5.67612
FCGR1A	-2.79808	1.91e-06	2.79808
SLC11A1	2.73597	4.63e-20	2.73597
TAP1	1.73962	3.54e-21	1.73962
IGFBP2	3.79551	8.67e-289	3.79551
IGFBP3	-5.29954	0.000159089	5.29954
IGFBP5	-6.04018	0	6.04018
SERPINE1	1.17967	0.000725384	1.17967
CXCL12	-11.8904	1.44e-29	11.8904
CD44	-1.55612	1.04e-22	1.55612
NCAM1	4.24777	7.17e-18	4.24777
SERPINA5	-12.1713	1.52e-23	12.1713
BCL2	-2.54782	6.46e-123	2.54782
VTN	2.33687	1.82e-07	2.33687
TGFB1	1.92499	3.37e-61	1.92499
RPL9	-1.40625	3.45e-30	1.40625
ADORA1	-7.88405	3.72e-142	7.88405
ADRA2A	-7.66414	1.82e-19	7.66414
ADRA2C	2.14377	7.7e-56	2.14377
ALDH3A1	6.57587	0.000316041	6.57587
ATP1A2	-5.21409	0.00166691	5.21409
CGA	4.41207	0.0256186	4.41207
CHRNB1	1.12614	0.000140153	1.12614
CHRNB2	-1.43715	0.000486454	1.43715
COMT	1.74439	3.08e-64	1.74439
CRAT	1.40123	1.28e-13	1.40123
CYP1A2	3.78705	0.00120001	3.78705
CYP2A6	-3.74666	3.08e-07	3.74666
CYP2E1	-2.02981	0.018977	2.02981
CYP2J2	-1.12634	2.57e-30	1.12634
CYP27A1	1.23374	0.0003688	1.23374
CYP27B1	2.22882	2.11e-21	2.22882
ACE	1.62589	1.43e-18	1.62589
DIO1	-4.11046	2.48e-18	4.11046
DIO2	4.74072	0.000274237	4.74072
DRD1	10.4102	3.19e-17	10.4102
DRD2	6.70117	1.29e-27	6.70117
DRD4	-1.75522	0.000524057	1.75522
GABRA1	7.23248	1.93e-07	7.23248
GABRA3	-3.73916	0.0058653	3.73916
GABRB2	8.49734	1.71e-14	8.49734
GABRG2	10.963	4.77e-19	10.963
GRIA2	5.01009	5.71e-12	5.01009
GRIK3	-3.32309	8.85e-96	3.32309
GRIN2D	2.95112	1.03e-25	2.95112
GRM2	1.94125	0.000674402	1.94125
GSTM3	1.13606	1.13e-20	1.13606
GUCY1A2	1.26077	4.95e-07	1.26077
HTR1D	5.1909	6.94e-22	5.1909
HTR1E	-6.63938	0.000166022	6.63938
HTR2C	-6.1714	0.000219182	6.1714
IL2RB	-2.86222	0.0208925	2.86222
IL12A	-2.86817	1.29e-06	2.86817
MAOB	6.62931	1.13e-79	6.62931
MME	3.6329	7.13e-10	3.6329
NPY1R	-12.1876	4.9e-45	12.1876
OPRD1	3.02295	3.66e-06	3.02295
OXTR	1.46181	6.74e-09	1.46181
PDE3B	-12.2966	6.23e-15	12.2966
PDE4C	1.83625	0.000564728	1.83625
PGR	-13.5721	2.93e-38	13.5721
PLAT	-1.93265	0.0318278	1.93265
POLR2A	1.26278	1.6e-40	1.26278
PON3	-1.29418	8.34e-07	1.29418
PRIM2	1.0887	5.05e-09	1.0887
PTGER2	2.40538	0.00138764	2.40538
PTGER4	-2.83589	4.84e-15	2.83589
PTGIS	-4.41866	0.00521243	4.41866
RPL3	-1.59693	7.06e-53	1.59693
RPL4	-2.39842	3.84e-117	2.39842
RPL5	-1.82138	7.58e-101	1.82138
RPL7	-1.19292	2.08e-25	1.19292
RPL8	-1.3158	1.09e-37	1.3158
RPL12	-1.19704	5.82e-26	1.19704
RPL13	-1.01569	1.09e-17	1.01569
RPL23	-1.53897	9.77e-45	1.53897
RPL18A	-1.11656	1.52e-17	1.11656
RPL22	-1.83585	1.01e-81	1.83585
RPL24	-1.02551	4.61e-19	1.02551
RPL26	-1.03833	5.37e-22	1.03833
RPL27	-1.08327	1.38e-23	1.08327
RPL30	-1.67925	7.16e-76	1.67925
RPL27A	-1.25271	3.98e-40	1.25271
RPL29	-1.35142	7.74e-37	1.35142
RPL32	-1.2801	4.32e-35	1.2801
RPL34	-1.58915	4.08e-45	1.58915
RPL37	-1.16248	4.41e-37	1.16248
RPL38	-1.05949	9.67e-21	1.05949
RPL39	-1.25632	1.99e-09	1.25632
LSS	1.04168	8.35e-18	1.04168
SLC35E4	2.40337	1.85e-26	2.40337
CD36	20.2228	8.24e-26	20.2228
GALK2	-1.23102	3.29e-39	1.23102
ARHGEF37	1.40086	8.21e-28	1.40086
IL17REL	2.85607	3.76e-11	2.85607
FAM166A	2.13327	0.00388708	2.13327
SH3BGR	-1.23375	1.56e-10	1.23375
C10orf55	4.23687	1.15e-05	4.23687
STX19	-3.16535	0.00083451	3.16535
GPM6B	-1.39563	0.00324233	1.39563
ASTL	-1.78829	0.0417756	1.78829
WLS	2.50397	4.1e-32	2.50397
GPR139	-3.32521	2.82e-09	3.32521
ERICH3	-4.94789	1.77e-05	4.94789
KCTD11	1.31177	8.42e-21	1.31177
CACNA1I	1.95628	1.78e-08	1.95628
ABLIM1	-1.39521	1.3e-93	1.39521
C1orf95	-1.49626	0.00859997	1.49626
ZMAT5	1.26559	1.35e-13	1.26559
KLHL31	-2.76545	9.35e-18	2.76545
MGLL	1.49538	3.29e-41	1.49538
GTF2IRD2B	-1.11189	2.59e-10	1.11189
TARP	7.03931	1.25e-09	7.03931
PARVB	2.1225	0.000349086	2.1225
SP5	3.40548	2.06e-09	3.40548
GRK6	-1.00744	6.1e-20	1.00744
TUSC1	-1.09705	1.12e-11	1.09705
C1orf168	-4.9849	0.000187922	4.9849
ZNF740	-1.08168	2.81e-31	1.08168
ZNF774	1.35312	1.05e-05	1.35312
LEKR1	-2.15099	0.000108915	2.15099
PAPL	1.51698	2.12e-07	1.51698
RNASEK	1.01809	7.89e-06	1.01809
FCGR1B	-4.252	0.0160542	4.252
METRNL	1.72535	4.99e-28	1.72535
ANKRD34B	1.37107	9.68e-10	1.37107
ST8SIA6	-2.46951	2.48e-17	2.46951
OR2A7	-4.78293	0.0304469	4.78293
MAGED1	2.72837	5.11e-87	2.72837
YPEL2	-1.12655	2.32e-09	1.12655
CACNA1H	-2.07013	6.83e-117	2.07013
JMJD8	1.15774	2.48e-24	1.15774
RPS4X	-1.53293	1.67e-46	1.53293
C8orf48	2.2022	0.000198989	2.2022
LKAAEAR1	4.13613	5.75e-08	4.13613
IGIP	-1.72435	3.83e-09	1.72435
IGSF3	1.09391	1.39e-43	1.09391
ERV3-1	-1.67851	1.21e-18	1.67851
DUSP13	1.16935	9.14e-05	1.16935
SHISA2	1.79687	1.2e-28	1.79687
IGFBPL1	6.27401	5.03e-07	6.27401
TTLL9	-2.98576	0.016631	2.98576
MXRA7	1.60358	2.45e-08	1.60358
CCBL2	-1.09017	2.49e-13	1.09017
TFIP11	1.24885	1.07e-40	1.24885
RAB19	1.49519	0.000239167	1.49519
RPS5	-1.20758	1.27e-27	1.20758
C20orf202	-5.35016	0.0307847	5.35016
SYTL3	2.41849	1.88e-15	2.41849
RPS6	-2.15255	5.36e-85	2.15255
IRAK1BP1	-1.87427	5.09e-19	1.87427
RNF187	-1.56161	1.53e-33	1.56161
SPIN3	1.09668	1.43e-08	1.09668
FAM83B	1.47996	1.64e-18	1.47996
ZNF311	-1.04568	5.32e-06	1.04568
CLPSL1	-1.96047	1.54e-11	1.96047
ACER2	1.71222	3.34e-13	1.71222
ZC3H12B	-2.82524	0.000102738	2.82524
SLC10A5	-3.34567	0.00317198	3.34567
HACD4	-3.6287	0.000123426	3.6287
BCL2L15	-1.48357	3.88e-06	1.48357
FAM171A1	-5.99594	8.91e-32	5.99594
NCMAP	-4.71791	5.15e-23	4.71791
HERPUD1	-1.46713	4.05e-28	1.46713
SLC9A4	7.61092	1.02e-07	7.61092
CENPP	1.11135	2.25e-08	1.11135
BIRC5	1.18133	2.43e-13	1.18133
ANO9	3.46423	1.67e-49	3.46423
ROPN1B	-3.41652	0.0263278	3.41652
MYLK4	-1.54799	3.43e-05	1.54799
GRAMD2	1.52866	2.75e-10	1.52866
SLC3A2	-2.16329	4.32e-56	2.16329
KRTAP5-10	-2.6276	0.00535492	2.6276
C9orf106	2.59875	2.1e-07	2.59875
ZNF763	-1.04272	0.019568	1.04272
RGMB	-1.00932	9.04e-24	1.00932
DDX60L	2.04084	2.44e-13	2.04084
RPS9	-1.20212	9.46e-25	1.20212
NHSL2	2.35378	1.51e-07	2.35378
DCAF12L2	-5.25619	0.00526977	5.25619
TCTEX1D4	3.44918	6.29e-05	3.44918
PRR25	-1.31941	0.000171739	1.31941
FRRS1	1.64082	0.000469862	1.64082
C17orf97	1.17798	1.1e-05	1.17798
FIGNL2	-3.92445	1.01e-09	3.92445
SRRD	1.25224	8.22e-19	1.25224
EIF2AK4	-1.22794	3.26e-66	1.22794
PLIN5	-4.60002	2e-125	4.60002
RLTPR	1.57232	5.24e-07	1.57232
CXorf40B	-1.03425	9.65e-20	1.03425
ANXA2R	-1.14007	2.12e-07	1.14007
LHX9	3.57348	0.038455	3.57348
C1QTNF9B-AS1	2.58706	8.68e-08	2.58706
C16orf93	1.15134	4.25e-07	1.15134
TAF9	-1.13067	3.99e-26	1.13067
RPS12	-1.63971	4.02e-65	1.63971
RPS13	-1.20966	2.62e-32	1.20966
LGR6	-3.04312	2.14e-06	3.04312
GOPC	-1.12567	1.09e-09	1.12567
ESCO2	2.17527	2.1e-14	2.17527
KCNK2	7.59514	0	7.59514
INPP5D	-3.60849	6.75e-08	3.60849
FAM78B	-3.43574	1.46e-12	3.43574
KIAA2026	-1.23457	1.89e-09	1.23457
ATP6AP1L	-2.39515	2.59e-16	2.39515
HFM1	-5.75133	0.00641817	5.75133
OPA3	1.00781	2.12e-05	1.00781
TPM1	-1.43556	3.71e-62	1.43556
VLDLR	-2.96008	2.89e-39	2.96008
FRMPD2	-4.41848	0.00017353	4.41848
ICE2	-1.07472	1.13e-07	1.07472
PODXL	1.13004	1.13e-18	1.13004
FANCB	1.33769	5.97e-05	1.33769
FANCD2	1.4594	9.74e-24	1.4594
RPS16	-1.1525	5.7e-25	1.1525
RPS17	-1.6767	2.07e-72	1.6767
GOLGA8B	-1.68893	0.00631498	1.68893
NAV3	7.0896	4.21e-08	7.0896
RGAG4	1.89598	3.27e-25	1.89598
MSS51	-1.2039	0.000214812	1.2039
C1orf53	1.18577	4.99e-07	1.18577
KALRN	3.24295	9.28e-52	3.24295
ACTL10	3.83991	1.5e-41	3.83991
FBXO48	2.93866	5.76e-07	2.93866
SLC6A9	-2.06474	2.99e-27	2.06474
RPS23	-1.83045	9.26e-90	1.83045
MBP	-1.3912	4.49e-13	1.3912
CD74	1.01532	0.00159319	1.01532
C3orf70	7.03533	1.1e-75	7.03533
AARD	1.91877	2.33e-40	1.91877
ARHGAP24	-3.72008	1.84e-08	3.72008
TTLL3	-1.44026	4.35e-09	1.44026
RPS25	-1.16932	1.06e-26	1.16932
PDE8B	-1.79359	3.79e-05	1.79359
SOWAHB	1.56777	4.97e-13	1.56777
RGS7BP	-7.37585	5.6e-08	7.37585
SFMBT2	6.00217	7.81e-186	6.00217
PLEKHG1	2.72621	0.00309919	2.72621
PGAM4	3.93616	0.0356828	3.93616
RPS27	-1.41639	2.32e-30	1.41639
RPS29	-1.24679	1.44e-25	1.24679
RPS15A	-1.3456	1.12e-38	1.3456
ATF3	-1.09466	1.03e-05	1.09466
CERKL	2.21493	0.00248177	2.21493
NT5DC3	-1.44136	1.04e-25	1.44136
KLHL7	1.67876	2.23e-35	1.67876
ERGIC1	-2.09732	1.97e-77	2.09732
CCDC78	-1.11206	2.14e-10	1.11206
C6orf165	2.92487	2.98e-33	2.92487
RIBC1	1.73465	3.12e-11	1.73465
OAS1	2.44957	1.78e-12	2.44957
RRM1	1.57103	9.73e-27	1.57103
NGRN	-1.20813	2.92e-34	1.20813
ENTPD8	2.79651	1.82e-20	2.79651
SGK3	-4.52521	1.46e-33	4.52521
ALDH1L2	-2.77446	1.5e-73	2.77446
NHP2	-1.34361	3.55e-47	1.34361
FAM134B	1.79741	1.93e-45	1.79741
UFD1L	1.85288	2.41e-71	1.85288
FAM129B	1.34802	3.99e-34	1.34802
SCN1B	1.3466	1.13e-05	1.3466
CYS1	2.95673	0.0157992	2.95673
ACOT6	-2.23023	2.78e-08	2.23023
PALM2	1.36479	0.041565	1.36479
LPPR5	8.30946	1.46e-10	8.30946
TRIM16L	2.35073	1.6e-68	2.35073
HELZ2	1.78457	1.88e-20	1.78457
RUFY3	-1.16829	2.3e-15	1.16829
EEF1B2	-1.0481	3.58e-16	1.0481
C17orf47	1.60881	0.00593819	1.60881
LRTM2	3.59487	4.41e-10	3.59487
TRIM71	-3.27693	1.48e-32	3.27693
CEACAM16	1.58021	0.0226815	1.58021
EFEMP1	4.16824	0	4.16824
ATP6V1E1	1.10849	7.99e-79	1.10849
RGS19	1.18502	3.1e-19	1.18502
SKA1	1.28628	1.13e-11	1.28628
MAP2	2.7375	1.18e-35	2.7375
ANGPTL4	3.85392	1.85e-20	3.85392
SNAPC3	-1.29799	1.15e-28	1.29799
EML6	1.73297	2.92e-23	1.73297
TMEM232	-3.5136	0.0153712	3.5136
CBLN3	1.0081	0.00763386	1.0081
CCNI2	1.30653	0.000657403	1.30653
HRCT1	3.46148	9.78e-05	3.46148
IZUMO4	1.26507	0.00559152	1.26507
C15orf56	-4.3733	0.000573169	4.3733
SWI5	1.20753	5.07e-29	1.20753
CD37	-1.90968	4.73e-05	1.90968
MOSPD3	1.04896	1.47e-08	1.04896
MYH11	-1.94995	6.7e-08	1.94995
DNAJC28	2.07428	8.89e-06	2.07428
PAQR3	1.35186	2.95e-09	1.35186
DCLK2	-1.30729	0.0185056	1.30729
ADAMTSL1	-4.61599	0.000708958	4.61599
C9orf131	-2.52671	0.000136485	2.52671
ZCWPW2	-2.35658	0.00486535	2.35658
CCDC112	-1.57774	2.34e-13	1.57774
BCL2L12	1.05894	6.1e-22	1.05894
HEY1	4.55871	3.94e-33	4.55871
KIAA0895L	1.02645	9.61e-16	1.02645
G6PD	1.8611	3.67e-60	1.8611
TFAP2A	1.62353	4.87e-98	1.62353
SLC12A6	3.35811	1.37e-41	3.35811
MINA	-1.58353	6.22e-35	1.58353
ENGASE	-1.66423	3.96e-49	1.66423
RYR1	2.64767	8.94e-19	2.64767
RCC1	1.11051	6.02e-26	1.11051
SSTR2	-2.6587	3.06e-14	2.6587
TACR1	-2.38457	0.0285007	2.38457
TACR3	2.01586	0.00266964	2.01586
TBXA2R	4.36642	0.00104624	4.36642
TCN1	-5.6305	4.83e-05	5.6305
TUBB2A	2.64935	1.21e-42	2.64935
TUBG1	1.94529	2.33e-39	1.94529
TYMS	1.57379	7.97e-33	1.57379
UGT2B11	-4.73694	0.00342151	4.73694
UGT2B10	-5.18212	7.63e-05	5.18212
UGT2B15	-5.29598	3.72e-26	5.29598
ZNF391	-2.78262	4.56e-10	2.78262
PDE11A	-1.49065	0.0105459	1.49065
DPH5	-1.9334	2.37e-75	1.9334
TMEM231	-1.22164	2.62e-14	1.22164
NR1I3	3.04212	5.72e-06	3.04212
TCF19	1.5038	6.17e-20	1.5038
VPS37D	-1.53518	1.1e-09	1.53518
TNFAIP8	-1.07344	2.54e-11	1.07344
AGAP6	-1.24315	1.3e-12	1.24315
FAM110C	1.58303	4.14e-63	1.58303
ZAP70	4.55579	1.75e-10	4.55579
IKZF2	5.15185	7.46e-48	5.15185
NKX2-1	5.12661	2.13e-05	5.12661
ITGA6	1.99599	4.52e-40	1.99599
ADGRG2	-1.35008	0.0004241	1.35008
CNGA3	6.3551	9.44e-05	6.3551
SP100	3.23409	2.89e-31	3.23409
KIAA1147	-1.40643	2.63e-33	1.40643
GXYLT2	1.21304	1.52e-09	1.21304
AATK	-2.26484	6.35e-13	2.26484
SLC45A1	-2.06498	0.00820621	2.06498
PLIN4	-4.94395	1.82e-81	4.94395
ZNF878	1.34736	0.00218593	1.34736
CCDC88C	-1.59626	7.41e-42	1.59626
DLGAP3	1.10055	0.0019908	1.10055
UNC13A	1.08965	0.0243224	1.08965
CCDC85A	-8.46323	2.75e-11	8.46323
WHAMM	-1.01594	1.51e-25	1.01594
SNED1	-4.5027	6.08e-110	4.5027
IGSF5	1.54342	0.000112924	1.54342
EPHA6	-2.502	6.06e-05	2.502
DNA2	1.31515	1.17e-07	1.31515
BEND3	-1.37225	4.29e-29	1.37225
SERPINA11	-7.90201	3.32e-09	7.90201
LRRC4B	2.28716	0.0296223	2.28716
ASPG	1.1434	0.0295887	1.1434
ZNF697	1.03146	3.39e-07	1.03146
FITM2	-1.33005	1.3e-18	1.33005
PLEKHM3	1.7334	2.72e-17	1.7334
TENM3	4.24087	4.32e-56	4.24087
MBOAT1	-2.22398	3.39e-48	2.22398
PABPN1L	-2.4544	0.000116122	2.4544
VWC2L	-7.41274	8.27e-08	7.41274
CCDC159	1.34995	5.61e-16	1.34995
TMEM150C	1.93264	2.48e-78	1.93264
OOEP	-3.27369	0.000313984	3.27369
RASSF10	2.38321	0.00503504	2.38321
MYO7B	-4.04017	0.00961382	4.04017
TMC3	-1.28165	0.00370866	1.28165
SNTN	2.62428	0.000754079	2.62428
CCDC150	2.00085	8.24e-06	2.00085
DGKG	7.98292	6.08e-10	7.98292
MYO1C	1.2131	5.57e-44	1.2131
TRABD2A	3.7935	0.000189742	3.7935
TMEM120B	-1.34395	1.84e-27	1.34395
SGK223	-1.78739	1.07e-47	1.78739
SEBOX	-2.44479	0.0253643	2.44479
CCDC30	-1.94739	0.0013996	1.94739
PXN	1.06199	1.05e-35	1.06199
REPS2	1.04738	8.95e-15	1.04738
CYP4F2	-4.19558	0.00650626	4.19558
PIH1D2	1.65101	0.0171947	1.65101
DDC	7.11776	1.12e-24	7.11776
PDE5A	-1.98769	1.1e-13	1.98769
GPD2	1.93551	7.06e-31	1.93551
FGD3	-2.13501	1.24e-26	2.13501
FAM86B1	-1.21074	0.00050908	1.21074
PTCH1	-1.72963	2.57e-17	1.72963
RB1CC1	-1.74065	2.01e-26	1.74065
TMPRSS4	-1.15573	0.000193443	1.15573
SERPINA3	-7.34803	7.95e-100	7.34803
C1orf226	-2.0414	2.24e-38	2.0414
RELL1	1.78843	1.18e-40	1.78843
C2orf54	-1.28973	5.49e-06	1.28973
FOXN3	-1.58173	1.95e-32	1.58173
ACACB	3.01138	2.24e-60	3.01138
TXNRD1	1.2056	1.18e-32	1.2056
GCNT1	1.08588	1.11e-07	1.08588
FUT3	-4.04424	0.00222556	4.04424
HRH1	5.40373	0.00178085	5.40373
HLA-F	1.18871	9.12e-06	1.18871
SGSM1	1.04094	0.0135231	1.04094
RAPGEF3	-1.06513	2.24e-06	1.06513
RPL31	-1.6198	1.25e-52	1.6198
ZNF98	4.33374	0.000143811	4.33374
SFTPA2	-1.50585	0.00416416	1.50585
TOX2	-3.57222	2.75e-10	3.57222
CEP78	1.12861	5.34e-13	1.12861
TENM4	2.62934	1.48e-16	2.62934
INO80C	1.15502	5.34e-15	1.15502
MORN4	-1.47052	1.76e-17	1.47052
EIF4E1B	-2.51736	0.0391611	2.51736
EHBP1L1	1.43231	8.36e-43	1.43231
BCAS3	2.31061	8.88e-100	2.31061
REPIN1	-1.46412	7.5e-45	1.46412
SYBU	-2.99214	7.77e-74	2.99214
POTEF	-1.80405	0.000191192	1.80405
SYS1	1.00535	0.000218678	1.00535
ITPR1	1.10229	1.37e-22	1.10229
RIMS2	5.57809	5.08e-20	5.57809
ATP6V0E2	1.38887	2.17e-26	1.38887
CENPN	1.09555	1.54e-22	1.09555
PHYHD1	-3.96046	0.0119992	3.96046
FAM72B	1.52856	6.87e-10	1.52856
KCTD19	-3.0687	0.00504247	3.0687
ACTB	1.606	4.82e-57	1.606
C1GALT1C1L	1.40711	0.00030184	1.40711
ZNF883	-5.57198	4.02e-07	5.57198
CCDC160	-3.87586	9.93e-09	3.87586
SBK2	4.32471	1.2e-18	4.32471
PHF21A	-1.19635	5.71e-41	1.19635
PCP4L1	3.82153	1.22e-13	3.82153
CT62	-5.12964	1.69e-42	5.12964
MIR205HG	-1.74095	1.07e-08	1.74095
SLC52A1	1.99785	1.16e-28	1.99785
SLC25A36	-1.19463	3.83e-09	1.19463
RUSC1	1.33279	7.94e-38	1.33279
JAKMIP3	1.42204	1.48e-14	1.42204
ACVR2B	-1.09249	4.49e-14	1.09249
ZNF250	-1.58666	3.89e-40	1.58666
GSG1L	-11.013	1.81e-08	11.013
RNFT2	1.30113	2.11e-06	1.30113
EBF4	-1.5965	4.1e-28	1.5965
ACVR1C	1.68653	0.00233039	1.68653
ACP5	-2.12147	3.15e-08	2.12147
CCNA1	-1.47767	0.00196604	1.47767
IQSEC2	1.56158	1.39e-32	1.56158
SCIN	-4.11041	3.1e-89	4.11041
KCNC1	2.32119	0.000559681	2.32119
SLC8A1	-4.81028	9.67e-10	4.81028
NACA	-1.13766	1.64e-28	1.13766
FANCI	1.21802	5.39e-10	1.21802
MDGA2	2.9881	3.81e-14	2.9881
RNF180	-2.61092	4.8e-21	2.61092
CLIC5	-4.2013	0.0301316	4.2013
C17orf85	1.05564	9.42e-53	1.05564
SYNPO2L	-3.16659	0.0127545	3.16659
CLCN7	-1.76691	6.86e-23	1.76691
PABPC4L	-1.74009	8.72e-05	1.74009
TMEM240	-3.82168	0.018272	3.82168
PLIN2	-1.28271	8.38e-09	1.28271
FAM178B	1.16902	9.66e-06	1.16902
ESR1	-1.15733	5.2e-52	1.15733
SERPINI1	-2.61312	4.92e-15	2.61312
C7orf65	6.19337	5.3e-05	6.19337
FAM72A	1.33749	2.92e-07	1.33749
ADM	1.72009	2.12e-08	1.72009
PABPC1L	-1.42095	6.45e-22	1.42095
KLLN	1.08546	6.29e-05	1.08546
SLC7A7	-1.43079	0.0365277	1.43079
TUFT1	1.79322	3.53e-67	1.79322
CEP55	2.04994	7.4e-22	2.04994
ELF4	1.3256	9.09e-30	1.3256
AUTS2	1.09919	1.85e-15	1.09919
BBC3	-1.86863	1.53e-15	1.86863
TMEM129	-1.13829	7.08e-21	1.13829
CDCA7L	1.11348	4.96e-30	1.11348
DFNA5	-4.27143	0.000194063	4.27143
ZNF469	2.00663	1.38e-13	2.00663
ITGB2	1.49527	1.89e-06	1.49527
ANK2	1.85018	0.00173509	1.85018
BANK1	4.27996	0.00254628	4.27996
FAM189A2	8.50219	7.3e-29	8.50219
FBP1	1.72843	1.78e-63	1.72843
NCF2	-2.99423	1.94e-05	2.99423
GSN	1.29434	6.21e-24	1.29434
BEX4	1.60641	3.48e-05	1.60641
SERPINA1	-5.43481	4.16e-183	5.43481
CHST8	-2.78949	1.03e-20	2.78949
PAK3	4.52555	0.00444306	4.52555
SULF1	-13.4758	2.94e-28	13.4758
KCTD6	-1.09964	1.39e-12	1.09964
SLC39A13	-1.25566	1.6e-42	1.25566
TPRN	1.0578	7.69e-20	1.0578
PSMG4	-1.68279	4.1e-33	1.68279
PAK6	-2.30505	5.13e-32	2.30505
ELFN1	1.67838	0.0466143	1.67838
CACNA1D	-1.29913	1.86e-14	1.29913
CYP4F11	-1.33498	7.02e-13	1.33498
AEBP1	1.88783	0.00396424	1.88783
PLEKHG4	-1.51678	3.73e-37	1.51678
CACNA1C	-2.04739	0.023198	2.04739
LRRC69	-1.20229	0.0454633	1.20229
SYTL4	-1.72228	6.58e-25	1.72228
KCTD15	-1.18627	6.14e-46	1.18627
C15orf41	2.86311	3.57e-16	2.86311
TCAF2	3.65481	1.69e-07	3.65481
PLEKHB1	2.71964	6.27e-103	2.71964
SLC44A5	-5.22563	0.000103932	5.22563
ABLIM2	-2.56476	1.14e-21	2.56476
STOX1	-2.0103	8.04e-18	2.0103
SCNN1D	1.35322	5.95e-06	1.35322
C10orf131	1.84542	0.00467477	1.84542
MPST	-1.26275	5e-24	1.26275
LEF1	3.82098	2.2e-24	3.82098
DNMT1	1.00808	1.83e-23	1.00808
PITPNM1	-1.45933	1e-32	1.45933
CDKN3	1.11736	1.13e-09	1.11736
CBLC	1.26409	0.00305722	1.26409
PPIP5K1	-1.47424	2.57e-36	1.47424
BTG3	-2.16777	0.00491623	2.16777
FABP6	-6.00553	9.1e-06	6.00553
TBXAS1	1.42432	0.00365544	1.42432
DYSF	2.15442	4.03e-06	2.15442
SATB1	6.57064	3.49e-26	6.57064
SAP30L	-1.76234	3.84e-71	1.76234
ACPP	-1.44421	0.000227787	1.44421
C1orf204	-1.70224	0.00486535	1.70224
ESRRG	1.78401	0.0134661	1.78401
RBM20	-3.47942	2.69e-18	3.47942
C7orf50	1.05323	2.97e-19	1.05323
PHLDB2	4.24439	6.03e-33	4.24439
DDAH1	-1.06458	7.21e-28	1.06458
LRRC8D	-1.93693	3.69e-93	1.93693
SLC35G1	1.31131	5.1e-09	1.31131
SLC12A5	1.11668	7.85e-10	1.11668
AHI1	-1.28233	2.6e-08	1.28233
CCDC152	-1.47774	0.0389469	1.47774
JDP2	-1.08589	6.55e-11	1.08589
LRRC15	4.7692	1.29e-22	4.7692
COCH	2.31805	4.55e-28	2.31805
CRELD2	1.28225	2.76e-35	1.28225
DPF1	2.62413	3.85e-26	2.62413
PIP5KL1	1.38969	4e-05	1.38969
NDRG1	-1.16671	7.57e-06	1.16671
PAX7	3.38632	0.0229119	3.38632
EPB41L2	6.95054	1.71e-138	6.95054
C12orf73	-1.23363	1.9e-24	1.23363
RPS27A	-1.17025	1.62e-40	1.17025
CLHC1	-1.40397	0.00130436	1.40397
ARHGAP26	-4.28467	3.71e-119	4.28467
FOXI3	1.7412	7.09e-08	1.7412
ACBD4	-1.3886	2.32e-19	1.3886
HMBOX1	-1.42139	6.44e-23	1.42139
NEIL2	-1.32206	1.65e-38	1.32206
SYN3	4.66078	0.0010422	4.66078
SYT1	1.07291	7.06e-08	1.07291
FAM60A	-1.15195	1.9e-18	1.15195
TMEM2	1.56189	9.45e-28	1.56189
SSPN	1.57329	2.22e-11	1.57329
METTL20	-1.27611	0.000623812	1.27611
DOLPP1	1.16374	5.27e-19	1.16374
MYOT	-6.61121	7.16e-05	6.61121
FCGRT	-2.38689	8.61e-07	2.38689
VWA9	-1.55639	7.74e-68	1.55639
ZNF879	-1.44355	1.47e-05	1.44355
DNM3	-2.51418	0.00472906	2.51418
EGR2	1.05939	0.0302397	1.05939
KANK2	1.05828	9.57e-37	1.05828
ARTN	-1.42135	3.91e-14	1.42135
PRDM6	-1.08504	6.7e-16	1.08504
C2CD4C	1.85608	5.07e-20	1.85608
DCAF8L2	-6.62483	4.22e-06	6.62483
ZNF732	6.6054	5.32e-09	6.6054
ALOX12B	-2.50505	3.12e-16	2.50505
FGF13	-2.58099	9.72e-16	2.58099
ALOX15	1.07725	3.36e-21	1.07725
ACTA2	1.04584	1.73e-06	1.04584
RPS24	-1.30167	7.06e-62	1.30167
SPG20	1.40238	7.01e-17	1.40238
CCNYL1	1.20048	3.18e-25	1.20048
MALRD1	-1.49259	2.5e-14	1.49259
GSTM2	-2.72996	4.06e-11	2.72996
NEDD9	-1.5337	6.08e-18	1.5337
PRRG1	-2.95215	3.36e-16	2.95215
C9orf47	1.13018	0.00104362	1.13018
ANK1	-2.04273	6.11e-09	2.04273
BHLHB9	-1.02509	1.88e-07	1.02509
WDR47	-1.61974	8.74e-23	1.61974
P4HA2	-1.11637	5.72e-14	1.11637
KIAA0141	-1.27672	3.99e-36	1.27672
RAB34	1.45514	0.0405402	1.45514
NEMP2	1.97602	7.71e-27	1.97602
FAM111B	2.80592	9.17e-13	2.80592
CHAC1	-2.63693	1.8e-16	2.63693
SLC6A8	1.78047	1.88e-33	1.78047
ACOXL	5.08213	5.4e-17	5.08213
GREB1L	1.82988	1.65e-26	1.82988
EIF5A	1.04495	3.21e-22	1.04495
FAM13C	-3.99183	7.82e-06	3.99183
PHOSPHO1	2.10601	0.00325063	2.10601
MAPRE2	3.8633	8.45e-40	3.8633
SLC13A5	-2.96534	0.0145015	2.96534
TCTN2	1.01695	2.68e-07	1.01695
FAM76A	1.06723	3.32e-12	1.06723
C15orf61	-1.75773	8.96e-31	1.75773
RBM24	-7.38424	4.28e-91	7.38424
GPR63	-1.22962	1.64e-10	1.22962
ZCCHC18	-1.61119	9.97e-05	1.61119
CCDC154	-2.06462	1.35e-10	2.06462
TLE6	1.93868	8.32e-10	1.93868
WRAP53	1.48806	8.29e-19	1.48806
OGDHL	-1.85278	1.77e-22	1.85278
AMFR	-1.90095	1.26e-88	1.90095
DOK3	2.23779	5.09e-11	2.23779
CITED1	1.66064	0.00115174	1.66064
MX1	1.15574	1.06e-06	1.15574
SSC5D	1.36705	0.0309364	1.36705
SDK2	-5.90917	2.65e-06	5.90917
NFKBIL1	-1.44554	6.56e-38	1.44554
C2orf72	-3.64382	4.94e-58	3.64382
ITGA7	1.04471	2.38e-05	1.04471
ANG	-5.11786	2.27e-90	5.11786
ITGAV	1.32706	1.37e-13	1.32706
CCDC153	2.47001	3.28e-10	2.47001
PALM3	1.8337	2.49e-43	1.8337
ANKRD30B	1.41352	8.36e-07	1.41352
PLAU	3.93774	1.32e-51	3.93774
SLCO3A1	2.19255	1.83e-39	2.19255
SLC44A2	1.99443	3.08e-105	1.99443
LRRC10B	1.35441	2.65e-06	1.35441
SLC2A6	4.0017	5.46e-95	4.0017
BTBD18	-1.32478	0.0166404	1.32478
FIBCD1	1.12679	2.69e-16	1.12679
CAPN14	5.96129	6.98e-06	5.96129
AK9	-1.19347	3.14e-05	1.19347
C12orf75	1.2836	1.67e-31	1.2836
SHISA9	2.30889	2.07e-26	2.30889
DEPDC1B	1.11659	5.03e-08	1.11659
SLC37A2	3.0424	3.73e-10	3.0424
CDK6	6.51366	7.98e-64	6.51366
DSN1	1.80425	1.14e-25	1.80425
PLS1	1.25809	2.68e-13	1.25809
OTUD1	-1.37229	3.18e-19	1.37229
TSEN2	-1.22905	1.51e-27	1.22905
MPPED2	-11.948	1.13e-22	11.948
CCDC110	-3.49233	9.14e-24	3.49233
SNX18	-2.01411	3.28e-127	2.01411
C17orf107	2.38157	5.27e-05	2.38157
ZBTB8B	4.3962	4.63e-05	4.3962
LMNTD1	5.97515	7e-06	5.97515
CACNB4	5.45734	3.84e-32	5.45734
ITGAM	3.41701	8.91e-06	3.41701
PROM1	-3.1195	1.32e-18	3.1195
SLC15A2	1.16623	1.01e-09	1.16623
NEK11	1.05073	1.69e-07	1.05073
IGFALS	-1.01501	0.00520998	1.01501
DLGAP5	1.28174	2.59e-09	1.28174
JPH4	-3.26177	0.00664345	3.26177
AVPR2	4.35235	0.00430423	4.35235
FAM25A	-4.26916	4.72e-22	4.26916
TACC1	1.20387	9.08e-23	1.20387
PODNL1	1.23608	0.0375386	1.23608
NACAD	4.75892	0.000546556	4.75892
ANPEP	-3.0102	0.016229	3.0102
ANXA6	-1.38164	7.65e-38	1.38164
ZNF716	-3.32515	0.0179717	3.32515
B4GALNT2	3.35396	4.18e-37	3.35396
BRI3	-1.59331	7.32e-12	1.59331
ZNF727	5.60395	2.1e-05	5.60395
POU5F1B	-2.20048	1.89e-07	2.20048
P2RX6	-2.29373	0.0343659	2.29373
SCNN1A	-3.16377	2.15e-62	3.16377
SLC27A2	-3.41974	1.36e-94	3.41974
BOD1	-2.24921	2.69e-157	2.24921
EMCN	-1.10757	0.010633	1.10757
BUD13	1.03676	2.25e-16	1.03676
SGOL2	1.37494	1.56e-08	1.37494
RHOBTB2	2.12021	3.07e-66	2.12021
IQCC	1.62612	2.54e-19	1.62612
CFAP69	-2.81443	0.0326052	2.81443
SYT3	1.2989	0.000353329	1.2989
NFASC	-1.93595	3.07e-05	1.93595
ZNF610	-2.27823	1.03e-16	2.27823
PTPRH	-2.38284	0.0170599	2.38284
SH2D2A	-2.24612	0.0486476	2.24612
PLEKHD1	2.42365	3.8e-10	2.42365
PROB1	-1.06203	2.21e-12	1.06203
TNIK	4.05351	8.51e-101	4.05351
SAMD4A	1.3539	8.69e-18	1.3539
MYB	-3.72336	8.36e-86	3.72336
RSPH4A	1.93289	0.00148036	1.93289
AHCY	-1.08426	1.74e-24	1.08426
LOC728392	-1.06526	0.0200463	1.06526
ARHGEF2	-1.73671	1.94e-38	1.73671
KIAA0040	-1.39792	2.29e-38	1.39792
CCDC166	-3.03178	0.0217232	3.03178
TYW3	-1.06787	4.07e-10	1.06787
SMIM5	3.98948	1.54e-47	3.98948
APBA1	3.83709	1.86e-24	3.83709
KIZ	-1.14373	4.33e-08	1.14373
RDM1	1.47818	5.26e-11	1.47818
PCYT1B	5.50913	0.000109061	5.50913
TENM1	2.22954	1.18e-06	2.22954
FBXL17	-1.29081	1.02e-30	1.29081
SYTL5	-8.25059	2.84e-116	8.25059
MEIOB	-3.08155	8.62e-06	3.08155
UBAP1L	-1.69129	0.0001468	1.69129
VSIG10L	1.79193	8.45e-30	1.79193
TRAF3IP2	-1.64319	1.32e-56	1.64319
ANKRD36	-1.29367	4.06e-05	1.29367
CBY3	-2.30518	1.37e-07	2.30518
C6orf132	-2.64543	1.45e-79	2.64543
MUC12	4.80342	0.00303744	4.80342
GOLGA6L10	-1.2386	0.011254	1.2386
SLC41A3	-1.10498	3.52e-14	1.10498
AMT	-1.43722	6.83e-07	1.43722
ZNF605	-1.17889	3.46e-06	1.17889
NOS1AP	-2.04509	5.83e-27	2.04509
LYRM4	-1.16902	1.88e-20	1.16902
NPAS3	3.80553	7.09e-47	3.80553
PDE4D	3.649	4.78e-30	3.649
RRM2	3.42376	2.43e-82	3.42376
ALOXE3	1.4359	0.000735535	1.4359
NRG3	-5.5818	5.48e-05	5.5818
SKA3	1.61639	1.27e-15	1.61639
AP1B1	1.63547	9e-62	1.63547
TMOD1	3.6197	2.52e-17	3.6197
GSDMD	1.65753	0.00543453	1.65753
KCNJ11	-1.11832	1.16e-13	1.11832
2025-03-01	-1.88556	3.32e-09	1.88556
SMOC2	-1.87449	3.71e-43	1.87449
EHHADH	1.15065	1.98e-10	1.15065
TRAPPC1	1.77301	7.06e-54	1.77301
AFF1	-1.50957	6.32e-40	1.50957
UPK3A	4.37868	4.7e-05	4.37868
NEU4	-3.24552	0.00250477	3.24552
RHBDD1	-1.31612	1.83e-25	1.31612
VEPH1	-3.04179	3.66e-40	3.04179
CCM2	1.20989	8.01e-20	1.20989
CADPS2	1.73077	1.41e-33	1.73077
TMEM178A	-4.88751	6.38e-07	4.88751
GPR156	-1.81496	4.45e-14	1.81496
RREB1	-1.04447	3.84e-26	1.04447
KIAA0319	4.18019	5.87e-24	4.18019
MAP7D2	-2.60207	2.83e-08	2.60207
ASB9	3.42833	4.87e-76	3.42833
TMEM135	1.64484	5e-17	1.64484
AQP8	-6.22938	0.000808458	6.22938
AFF2	7.13617	6.68e-06	7.13617
AQP7	-2.67226	0.00656149	2.67226
TJP2	1.16495	1.54e-70	1.16495
SRGAP2	2.14387	6.75e-113	2.14387
ZNHIT6	-1.55735	4.73e-20	1.55735
MIB2	-1.22615	1.12e-31	1.22615
MBNL3	1.2287	2.26e-06	1.2287
GPR137	1.86418	1.84e-45	1.86418
SRPX	-5.76728	6.98e-09	5.76728
PPP1R32	-1.18005	0.00340126	1.18005
C1orf127	5.92348	3.33e-07	5.92348
NBPF15	-1.03899	6.07e-22	1.03899
FAM122B	1.10618	9.31e-25	1.10618
BACH2	-1.72701	2.1e-09	1.72701
ZFAND1	-1.53117	1.6e-20	1.53117
IFITM10	-1.87975	1.54e-10	1.87975
CLDN2	-1.93265	0.00765599	1.93265
SIGLEC10	3.08897	0.00107953	3.08897
SLC25A21	-1.04198	4.09e-07	1.04198
CX3CR1	-3.93966	2.28e-08	3.93966
VEGFA	-2.3606	1.52e-35	2.3606
NOSTRIN	1.85258	1.35e-05	1.85258
C3orf52	1.10091	3.91e-19	1.10091
GBA	1.05323	5.04e-22	1.05323
OAT	1.72393	1.54e-54	1.72393
NUDT16	1.08047	4.38e-41	1.08047
FNDC5	1.66375	8.08e-07	1.66375
CDHR5	-1.97736	1.03e-07	1.97736
CDHR2	-1.21691	0.0031815	1.21691
HPD	1.19743	0.00393892	1.19743
HCK	-8.48447	7.11e-09	8.48447
MASTL	1.39542	4.76e-13	1.39542
PEG10	1.22936	0.0384813	1.22936
NEO1	-1.09295	7.46e-38	1.09295
ZFP62	-1.90786	3.74e-35	1.90786
ZNF573	-1.04469	0.000780153	1.04469
PPARGC1B	-1.77847	4.86e-25	1.77847
SLC38A6	1.1714	1.23e-06	1.1714
CRBN	-1.01377	4.46e-13	1.01377
PCDH7	5.18696	9.56e-135	5.18696
OSBPL10	1.63738	2.02e-45	1.63738
FAM53A	-1.33031	1.84e-08	1.33031
SLC4A11	1.36766	1.86e-10	1.36766
SLC29A3	-1.6996	2.22e-28	1.6996
PRRT4	1.55742	1.91e-06	1.55742
SLC16A6	1.58273	1.68e-29	1.58273
ARHGDIB	-1.46171	3.42e-11	1.46171
SLC34A3	1.45048	2.97e-10	1.45048
ALPL	-4.87634	1.04e-10	4.87634
ARHGEF28	-3.7847	2.03e-200	3.7847
CBS	-1.55515	2.26e-07	1.55515
CDC45	2.62239	5.21e-64	2.62239
EGF	5.28585	4.38e-49	5.28585
NPNT	2.28717	2.73e-135	2.28717
CPXM1	-4.26981	3.92e-06	4.26981
UGDH	-1.08865	2.88e-17	1.08865
TCN2	4.30985	0.0098403	4.30985
PGBD1	-1.21903	4.42e-06	1.21903
SLITRK4	-5.49221	6.77e-66	5.49221
ARMCX6	-1.06929	1.3e-23	1.06929
NOX5	1.08216	0.0250782	1.08216
DGCR2	1.14959	4.41e-24	1.14959
CEACAM1	1.96873	0.000131698	1.96873
NRG2	2.99236	8.57e-17	2.99236
EPB41L5	1.28243	1.04e-14	1.28243
FAM219A	1.01228	1.37e-23	1.01228
AZGP1	-3.19699	1.96e-06	3.19699
AIF1L	1.28853	1.05e-34	1.28853
CD22	-4.18258	2.03e-07	4.18258
RNF224	2.81359	1.71e-35	2.81359
GNE	1.49526	8.28e-35	1.49526
CAST	-1.05899	9.65e-30	1.05899
MTRNR2L4	-1.88285	0.000114283	1.88285
CLSPN	2.65337	5.52e-57	2.65337
MTRNR2L9	-4.08779	0.0096901	4.08779
RERG	-6.28556	5.09e-244	6.28556
STMND1	-1.53112	0.0155963	1.53112
MCIDAS	1.03603	0.00143427	1.03603
PLK4	1.11946	2.7e-05	1.11946
ORC1	1.89905	7.06e-26	1.89905
MGP	-5.8113	0	5.8113
SYTL1	-1.05918	1.74e-23	1.05918
IKBKE	2.1253	8.6e-45	2.1253
TUBA8	1.50315	3.24e-05	1.50315
PLEKHS1	1.61076	7.17e-13	1.61076
MSRB3	2.65388	6.58e-08	2.65388
SLC1A4	-2.09945	4.1e-99	2.09945
CSRP1	1.35991	1.09e-36	1.35991
TRABD2B	-2.91236	0.000818772	2.91236
DDIT3	-3.27247	3.12e-45	3.27247
GGACT	-1.20112	1.02e-07	1.20112
ZMYM6NB	1.25583	1.2e-14	1.25583
ZNF783	-1.25097	1.6e-25	1.25097
FAM64A	1.71045	2.4e-19	1.71045
SMKR1	1.18722	1.83e-15	1.18722
PDZD7	-1.87273	5.45e-19	1.87273
GPR35	-2.0258	1.99e-05	2.0258
TMEM99	1.0307	5.53e-08	1.0307
TLX1	1.41547	0.0380385	1.41547
PLA2R1	1.07863	9.92e-10	1.07863
TGFBR3	-2.72971	1.22e-29	2.72971
LDLR	1.74855	4.57e-17	1.74855
TUBB3	4.64628	9.34e-122	4.64628
ASGR1	-1.26882	0.0318115	1.26882
DPYSL2	1.48413	5.31e-26	1.48413
DPYSL3	5.68879	8.75e-06	5.68879
CLEC2D	1.29212	3.11e-07	1.29212
POLE2	1.65657	2.61e-18	1.65657
ADCY4	-2.68643	0.0151385	2.68643
MAP7	-1.57366	7e-141	1.57366
RUNX1T1	6.61152	7.63e-21	6.61152
AIFM2	2.15008	1.58e-93	2.15008
NFATC4	-1.00551	9.81e-09	1.00551
C14orf80	1.04392	3.02e-16	1.04392
NFS1	1.11675	4.08e-19	1.11675
SEMA6D	5.70645	3.1e-48	5.70645
SERINC2	2.54436	2.27e-94	2.54436
STRA6	3.09321	0.000283586	3.09321
LEMD1	-8.54832	8.97e-11	8.54832
EIF3C	1.99215	0.0451552	1.99215
KYNU	4.75087	4.37e-181	4.75087
SGOL1	1.03362	4.66e-07	1.03362
RPL17	-1.36652	4.11e-35	1.36652
RNF145	3.92023	8.83e-225	3.92023
PHACTR3	1.81519	0.0370783	1.81519
TGIF2	-2.11441	5.05e-63	2.11441
NCOA7	-1.48966	1.3e-12	1.48966
EDA2R	-3.89196	1.79e-25	3.89196
CRABP2	2.69076	1.02e-107	2.69076
CTSS	1.78638	0.0169893	1.78638
MTHFS	-2.06094	0.015604	2.06094
OTX1	-1.37776	4.98e-12	1.37776
CENPO	1.23822	4.52e-24	1.23822
SBK3	1.81771	0.00101562	1.81771
AK3	-1.02028	2.13e-32	1.02028
ANGPT1	-4.04768	0.000722901	4.04768
KCNAB2	1.34732	1.98e-30	1.34732
HYAL3	1.854	4.1e-16	1.854
NMNAT3	-1.1458	1.74e-13	1.1458
NPL	2.27295	2.83e-23	2.27295
PPP1R3B	-2.00077	1.44e-53	2.00077
GALC	-1.65626	2.68e-09	1.65626
DAAM2	5.68523	2.14e-54	5.68523
OSBPL6	-1.01802	4.58e-24	1.01802
CTSV	1.92554	1.03e-28	1.92554
PLSCR3	1.24853	0.00934641	1.24853
NR4A1	1.85901	4.49e-29	1.85901
PRDX1	1.0022	1.71e-33	1.0022
BMPR1B	4.69339	7.66e-158	4.69339
RPS10	-1.55099	1.98e-25	1.55099
TP73	1.45431	2.58e-20	1.45431
NPR3	-2.23527	2.29e-23	2.23527
ANK3	1.42602	3.74e-25	1.42602
RGS6	-6.37385	1.48e-06	6.37385
TNFRSF19	8.70205	5.18e-12	8.70205
ZNF587	-1.35211	6.15e-28	1.35211
ZNF587B	-1.119	2.17e-17	1.119
ZNF568	-1.12941	0.00121031	1.12941
ALDH2	-2.74648	0.00727639	2.74648
CRISP1	4.50781	0.00587425	4.50781
ACSL6	4.32481	0.0182381	4.32481
IGSF23	2.00351	0.0139619	2.00351
RIMS4	-1.99608	1.11e-42	1.99608
ELMO1	3.73623	1.16e-19	3.73623
SH3GLB1	-1.10451	2.1e-36	1.10451
IGSF8	1.1282	1.87e-20	1.1282
ITGB3BP	1.28081	1.79e-08	1.28081
CSPG5	2.10196	1.01e-18	2.10196
SLC16A3	2.2471	1.7e-37	2.2471
C4orf26	3.95291	0.0025024	3.95291
BTF3	-1.43821	7.23e-75	1.43821
CNTFR	-3.66202	2.22e-15	3.66202
PGF	-3.56922	0.00282834	3.56922
SHISA8	2.2108	7.2e-14	2.2108
TMEM191C	3.02974	0.00128088	3.02974
CXADR	1.64439	2.13e-05	1.64439
CA9	3.46894	0.00934641	3.46894
CA11	1.62754	1.95e-19	1.62754
GLYATL1	4.10597	0.0163508	4.10597
CASP4	-4.44404	5.25e-25	4.44404
CASQ2	5.13429	0.00150875	5.13429
CCNA2	1.05244	7.7e-12	1.05244
CCNE1	1.94275	1.39e-49	1.94275
TMEM191B	2.39064	7.15e-06	2.39064
HLA-DPA1	2.33431	0.000244753	2.33431
PHACTR1	-1.29006	0.0119638	1.29006
ERVMER34-1	1.2656	1.17e-20	1.2656
LOC100130357	-1.75774	0.000162667	1.75774
ZNF385C	-1.44381	0.00155898	1.44381
LOC100129924	-2.17635	0.000212079	2.17635
BRDT	8.18848	1.79e-10	8.18848
ANKRD6	-1.77794	3.45e-06	1.77794
ENOX1	1.53594	8.51e-05	1.53594
DEPDC5	1.22618	4.41e-30	1.22618
RSPO1	-3.89759	5.05e-06	3.89759
SNCAIP	-2.10834	0.00284323	2.10834
PROX2	-1.28567	0.0156598	1.28567
ABCB9	1.68791	1.95e-28	1.68791
HLA-C	2.65896	3.09e-57	2.65896
PLK5	-2.36739	0.0171346	2.36739
FOXM1	1.35643	4.77e-23	1.35643
PLD2	1.17642	8.41e-29	1.17642
PDE8A	-1.51387	6.08e-51	1.51387
NVL	1.40695	1.38e-115	1.40695
ATP7B	1.10705	4.49e-41	1.10705
PIM1	-2.1291	1.72e-46	2.1291
CCER2	-2.04331	0.00013766	2.04331
ZSCAN31	-2.39476	1.92e-25	2.39476
ALCAM	-1.18569	6.16e-15	1.18569
ERG	1.62469	0.000703824	1.62469
CDON	-1.66775	3.7e-40	1.66775
LMO3	8.51262	1.06e-11	8.51262
GLRX	2.1387	1.49e-22	2.1387
NUDT7	2.20909	1.26e-07	2.20909
STAT4	3.89418	1.17e-06	3.89418
NEDD4L	1.66065	4.42e-85	1.66065
HLA-DQB1	2.80771	1.91e-13	2.80771
HLA-DRB1	3.6008	4.47e-18	3.6008
SPIB	2.43585	0.0420051	2.43585
KIF1A	-5.01295	0.000532093	5.01295
BID	1.12269	2.27e-28	1.12269
IMMP2L	-2.03166	5.5e-21	2.03166
CSAD	-1.64036	1.3e-36	1.64036
DAB2	6.26792	3.1e-05	6.26792
UNC5B	-3.72397	2.28e-49	3.72397
MST1R	1.53253	2.55e-28	1.53253
ENTPD3	1.71681	1.32e-08	1.71681
CD68	-1.01841	1.49e-06	1.01841
TRPC1	2.20664	7.4e-12	2.20664
VIPR1	3.11407	9.3e-151	3.11407
CD83	1.23931	1.14e-07	1.23931
NR1H3	-1.28138	8.27e-22	1.28138
GMNN	1.65487	9.47e-16	1.65487
LUZP2	7.29312	5.16e-45	7.29312
TOR2A	1.36314	2.27e-17	1.36314
KIF21B	-1.07593	0.000760893	1.07593
TNIP1	-1.45292	5.19e-39	1.45292
CLPS	-3.27503	5.65e-06	3.27503
THRB	-1.4695	1.75e-34	1.4695
SLC1A2	-1.37155	1.01e-12	1.37155
GULP1	3.63768	7.52e-37	3.63768
ERBB2IP	-1.14169	1.49e-08	1.14169
KREMEN2	1.24427	2.3e-20	1.24427
SMIM22	-3.71214	2.24e-14	3.71214
ALPK1	-1.28965	4.22e-12	1.28965
DGAT2	-1.48722	1.64e-13	1.48722
AKR1C3	-7.68753	1.28e-09	7.68753
CDC6	2.16948	3.98e-45	2.16948
AP4S1	-1.04163	6.53e-18	1.04163
NABP1	1.27938	4.11e-08	1.27938
RND3	2.75278	5.12e-45	2.75278
CYB5D2	2.02731	1.48e-54	2.02731
CCDC88A	-1.53992	9.72e-07	1.53992
COLEC11	3.73962	0.0120235	3.73962
MYH10	1.19391	2.09e-52	1.19391
C11orf45	3.81259	4.69e-06	3.81259
S100PBP	1.21349	1.64e-34	1.21349
ARMCX4	-1.09561	0.0122415	1.09561
ATF7IP2	-1.03697	7.01e-06	1.03697
APOM	-1.09652	0.000870539	1.09652
ATP1A3	-1.17763	3.11e-06	1.17763
HPGD	-8.80056	5.74e-16	8.80056
TMPRSS3	-4.49138	1.56e-114	4.49138
E2F8	2.17177	3.13e-25	2.17177
LRRC39	-2.65241	1.18e-05	2.65241
STON2	3.72618	4.02e-34	3.72618
CABLES1	-1.27624	2.29e-22	1.27624
C19orf47	1.23082	2.71e-20	1.23082
PRRT2	1.05944	7.92e-14	1.05944
SLC12A2	2.1612	7.97e-43	2.1612
CMPK2	3.34487	1.43e-08	3.34487
MAN2C1	-2.179	1.97e-73	2.179
MEGF10	-3.02507	5.69e-05	3.02507
ENC1	1.94921	2.39e-53	1.94921
TRIM46	1.69163	7.23e-24	1.69163
R3HCC1L	1.25049	1.03e-09	1.25049
BRSK2	1.01213	5.1e-09	1.01213
ZNF43	1.04402	6.63e-06	1.04402
KIAA0391	1.02382	3.05e-21	1.02382
MELK	1.4849	1.23e-14	1.4849
C9orf173	1.44723	1.03e-05	1.44723
CLEC19A	-2.82053	0.00266536	2.82053
GDAP1L1	-3.07394	0.000140785	3.07394
NOL4L	1.09289	7.13e-16	1.09289
RPS3	-1.45457	2.06e-34	1.45457
GRM4	2.23633	5.99e-15	2.23633
CDCA8	1.03635	4.84e-10	1.03635
FAM26D	5.71253	0.0362927	5.71253
LIF	-1.05382	0.000204118	1.05382
LOC339862	-1.95474	0.000150162	1.95474
ARRB2	1.19136	1.21e-17	1.19136
ABCG2	4.69049	4.79e-112	4.69049
PDLIM3	-7.24882	1.02e-63	7.24882
CRB1	-4.09862	0.0101465	4.09862
CCDC129	3.227	0.0254249	3.227
IL4R	-1.66282	1.09e-44	1.66282
C10orf142	-6.09363	0.000156857	6.09363
SKOR1	-2.22424	0.00280795	2.22424
SPRY1	-1.97298	1.99e-14	1.97298
TSKU	-1.54194	1.8e-23	1.54194
KCTD1	-1.57533	3.22e-24	1.57533
MLH1	1.03963	3.56e-20	1.03963
NFATC2	-2.1006	1.97e-38	2.1006
SFI1	1.44925	9.98e-36	1.44925
HAL	2.95085	0.0293796	2.95085
CCDC103	1.5583	1.36e-06	1.5583
SLC4A8	3.31511	6.89e-123	3.31511
SLC5A11	2.14235	0.0187279	2.14235
TOP1MT	-1.59381	6.76e-33	1.59381
LSR	1.04274	7.17e-21	1.04274
UEVLD	1.07211	6.49e-07	1.07211
LPIN1	1.10775	1.83e-12	1.10775
PTGES3L	2.5027	0.000645303	2.5027
ETV4	2.43346	2.39e-26	2.43346
NFE2	2.15571	0.000756489	2.15571
BZRAP1	3.15321	0.0316854	3.15321
ZNF623	-1.27147	5.1e-54	1.27147
CDSN	1.27541	6.1e-06	1.27541
KIF18B	1.24539	5.85e-21	1.24539
SMC2	1.71049	8.85e-10	1.71049
MZF1	-1.08841	9.51e-21	1.08841
CENPK	1.29623	1.5e-06	1.29623
TBC1D2	2.63867	1.23e-55	2.63867
MGST1	1.98829	3.71e-57	1.98829
ZNF248	-1.14681	3.59e-07	1.14681
GPR161	1.12727	6.45e-15	1.12727
ZNF706	-1.13478	7.28e-43	1.13478
IL11	1.18854	0.0190138	1.18854
ZMYND15	1.24036	7.89e-06	1.24036
EMID1	1.50739	1.25e-34	1.50739
ALDH1L1	2.64284	0.000171638	2.64284
PKIB	-7.36514	0	7.36514
GLIPR1L2	-5.66398	4.18e-05	5.66398
APOBEC3B	4.79425	1.51e-192	4.79425
CDC42EP3	-5.29054	1.01e-68	5.29054
MAOA	1.70349	7.85e-14	1.70349
PSMB6	1.6833	9.91e-59	1.6833
PSMD11	1.25373	6.71e-56	1.25373
DAAM1	-1.05293	4.74e-10	1.05293
MDK	1.45058	1.43e-30	1.45058
CSNK1G3	-1.11891	1.63e-10	1.11891
SLC16A7	1.39499	1.46e-08	1.39499
STRIP1	-1.06918	7.5e-27	1.06918
KLF7	2.51129	2.49e-29	2.51129
EPGN	-4.62438	0.0174303	4.62438
TFPI2	5.535	3.28e-08	5.535
CFAP221	-5.55568	2.67e-05	5.55568
NKD2	-1.80817	4.85e-16	1.80817
PCED1A	-1.11169	6.57e-21	1.11169
RAP2C	2.82643	3.37e-87	2.82643
SQRDL	1.3847	1.9e-18	1.3847
CCDC177	1.59833	0.000617767	1.59833
KCNMA1	5.77021	4.37e-199	5.77021
PRNP	-1.39701	1.32e-54	1.39701
SESN3	2.82413	0.00013145	2.82413
BASP1	3.07503	1.5e-149	3.07503
ZNF423	1.27993	0.0259336	1.27993
RAB3IL1	-1.14481	0.000604267	1.14481
ANXA8	-3.68848	0.0459063	3.68848
MST1L	-1.16053	0.0019039	1.16053
APEX2	1.05786	1.66e-22	1.05786
C5AR2	-10.002	2.34e-21	10.002
SLC16A5	-3.1078	3.15e-52	3.1078
PFKFB1	2.3212	7.97e-06	2.3212
DCLRE1A	1.114	1.94e-07	1.114
KLHDC8A	-3.44087	8.12e-07	3.44087
SRGAP2B	2.4883	3.3e-18	2.4883
SRGAP2C	2.14679	1.62e-12	2.14679
SEC11A	-1.05419	1.82e-43	1.05419
SLC39A1	1.04989	4.32e-28	1.04989
RAB4A	-1.20461	1.93e-67	1.20461
TSPEAR	10.0513	4.2e-16	10.0513
CDK5RAP2	1.01739	6.16e-18	1.01739
VWA2	-2.81923	1.97e-15	2.81923
SHISA5	1.04014	1.82e-17	1.04014
AP1S2	-1.16795	7e-12	1.16795
AOC1	3.74145	3.69e-12	3.74145
CHGA	4.40088	2.82e-15	4.40088
CHI3L1	-8.97144	1.41e-12	8.97144
WDTC1	1.30731	8.51e-43	1.30731
NOL3	1.05183	4.61e-16	1.05183
PPP1R3E	-1.51426	1.38e-22	1.51426
TNNT2	-3.45913	0.000774798	3.45913
LZTFL1	-1.32556	9.89e-10	1.32556
LDLRAD1	1.58022	0.0110359	1.58022
LONP1	-1.17523	3.73e-31	1.17523
ZNF541	1.28998	0.000283825	1.28998
ZNF550	-1.13387	8.65e-09	1.13387
LRRC31	-6.20584	1.78e-06	6.20584
ZBTB10	-1.00468	7.3e-09	1.00468
P2RY6	7.85432	9.24e-130	7.85432
IGSF9B	-1.35753	1.87e-16	1.35753
ZNF891	-1.10006	0.000236915	1.10006
MAGEB17	-7.46142	1.15e-07	7.46142
FMN1	-3.96363	1.04e-82	3.96363
KIAA2012	3.21752	0.00551296	3.21752
ZNF730	1.07972	0.0275908	1.07972
ZNF83	-1.20037	8.7e-09	1.20037
COL5A1	1.58102	2.02e-19	1.58102
L1CAM	3.93942	6.25e-48	3.93942
ZKSCAN8	-1.68013	1.11e-22	1.68013
EOMES	-1.30233	2.34e-06	1.30233
MS4A15	-6.13689	0.00107925	6.13689
SLC25A45	2.16736	2.47e-38	2.16736
PIP5K1B	5.08519	1.62e-11	5.08519
FRS2	-1.21568	8.11e-13	1.21568
RHOH	2.57783	2.36e-19	2.57783
MPP2	3.12141	3.41e-48	3.12141
DYNC1I1	7.23808	3.16e-08	7.23808
PRKAR1A	1.04081	2.83e-25	1.04081
GPATCH11	1.6891	1.15e-10	1.6891
ZNF229	1.25444	1.06e-17	1.25444
TUBA4A	1.84736	0.000144679	1.84736
WSB2	1.12421	6.35e-36	1.12421
ACVR2A	-1.04994	1.88e-05	1.04994
ANO2	-3.64877	0.00392354	3.64877
MYBL2	1.93669	3.68e-45	1.93669
BUB1	1.18532	2.83e-12	1.18532
NFXL1	-1.0744	7.25e-22	1.0744
C9orf43	1.05373	0.00821519	1.05373
IRX4	1.44142	5.95e-16	1.44142
RANBP1	1.46967	3.73e-52	1.46967
B3GALT5	-2.90489	1.78e-19	2.90489
IL20RA	-2.5837	1.31e-103	2.5837
TSPAN6	-1.05981	3.77e-23	1.05981
RFC2	1.04201	5.61e-14	1.04201
RNF19A	-1.08198	1.21e-14	1.08198
DPF3	6.5935	5.24e-07	6.5935
PAX5	-1.15161	2.91e-08	1.15161
ANP32E	1.49199	3.73e-12	1.49199
EPHB6	-3.5483	4.94e-10	3.5483
GLS2	-1.20597	2.3e-15	1.20597
RNF130	-1.13025	7.84e-67	1.13025
UPK1A	3.14666	6.11e-10	3.14666
PPIP5K2	-1.1251	3.13e-06	1.1251
MLPH	-1.86565	2.87e-59	1.86565
FADS2	2.02235	1.01e-31	2.02235
FHOD3	3.64695	6.37e-26	3.64695
SHMT1	1.89789	5.43e-93	1.89789
FSD2	-1.47839	4.44e-06	1.47839
DOC2A	-1.57475	8.47e-15	1.57475
SSH2	1.15062	1.79e-14	1.15062
UBXN8	-1.20581	4.16e-24	1.20581
ZC3HC1	1.04124	8.87e-09	1.04124
RNASE4	-5.74321	1.21e-108	5.74321
ZNF630	-1.41685	3.15e-10	1.41685
CECR1	2.44312	2.01e-09	2.44312
PYCR1	-1.44415	2.21e-39	1.44415
CATSPER2	-1.57524	4.07e-07	1.57524
PLS3	3.85944	0.00350433	3.85944
ITGB6	7.52716	1.63e-75	7.52716
KCNS3	2.52757	1.01e-127	2.52757
ARL4C	2.34424	3.14e-46	2.34424
LOC100506127	-1.13121	2.28e-06	1.13121
LRRC63	4.91403	0.000656163	4.91403
TMEM210	1.53121	0.0063856	1.53121
BTBD3	-1.28312	3.24e-40	1.28312
ZCCHC17	2.04905	1.69e-56	2.04905
ARHGAP36	-7.35883	2.61e-08	7.35883
GNAI2	1.02856	2.92e-23	1.02856
SH3YL1	-1.08784	4.28e-14	1.08784
OSBP2	1.31182	1.5e-20	1.31182
ARMC3	-3.93819	0.000819811	3.93819
POLR1E	-1.03579	6.5e-21	1.03579
PRTFDC1	2.89643	9.33e-16	2.89643
ZNF7	-1.19632	4.37e-18	1.19632
STIL	1.23269	2.72e-14	1.23269
MDH1B	1.66005	0.00467625	1.66005
MED30	-1.03739	2.09e-14	1.03739
RTEL1	1.32634	2.32e-09	1.32634
DEPTOR	-3.9187	5.83e-88	3.9187
TANGO2	1.0851	4.25e-21	1.0851
INPP5J	1.99764	4.83e-64	1.99764
CHPF2	-1.32023	1.39e-30	1.32023
ANLN	1.89874	7.91e-11	1.89874
ZNF106	-1.0061	8.24e-19	1.0061
ADAP1	1.47139	4.47e-15	1.47139
LRRC49	-3.26546	2.61e-10	3.26546
UBE2Q2	-1.43153	3.27e-29	1.43153
TMEM40	1.87928	3.45e-05	1.87928
LYSMD4	-1.22001	2.98e-08	1.22001
MYRIP	-8.81304	8.82e-24	8.81304
AURKB	1.99527	4.63e-37	1.99527
ADCY7	-2.20345	5.68e-11	2.20345
RAB30	-1.27768	3.79e-23	1.27768
C11orf54	-1.08571	1.27e-10	1.08571
RPA2	2.06933	1.04e-59	2.06933
MARK1	-5.50861	5.15e-42	5.50861
SMPDL3A	-2.31423	7.57e-25	2.31423
MPZL3	1.30957	6.45e-27	1.30957
CCDC83	3.61226	9.32e-13	3.61226
TMEM117	-1.08964	2.04e-05	1.08964
DTL	1.64141	4.11e-21	1.64141
SLC2A14	-6.5359	9.78e-05	6.5359
TPT1	-1.40964	1.7e-44	1.40964
OLFML3	-3.26666	6.7e-13	3.26666
PPIL6	-3.32493	4.71e-14	3.32493
TOMM40L	1.56449	1.46e-39	1.56449
FAM65B	2.6793	2.35e-05	2.6793
HDDC3	-1.12315	4.79e-24	1.12315
N4BP2L1	-1.11951	1.6e-05	1.11951
TMEM87A	-1.01484	1.85e-26	1.01484
CAPS2	-2.09133	0.00209072	2.09133
MICAL1	1.23638	7.16e-12	1.23638
CALML4	-1.71456	4.02e-40	1.71456
AMTN	5.90451	7.85e-15	5.90451
SYNPO2	3.27022	4.15e-30	3.27022
KIAA0226L	-6.1552	0.000304177	6.1552
ZNF34	-1.24726	8.33e-23	1.24726
ANTXR2	2.13307	2.59e-29	2.13307
PCMTD1	-1.26633	7.98e-08	1.26633
CNOT6L	-1.09274	1.62e-13	1.09274
DCAF10	-1.81087	3.04e-46	1.81087
PHF19	1.82739	1.5e-59	1.82739
TRMT10B	-1.12438	6.56e-15	1.12438
CCDC65	-1.23662	0.00173205	1.23662
CTNNAL1	1.39519	1.65e-33	1.39519
SUSD3	-5.79321	4.6e-173	5.79321
HECW1	5.36851	0.000281068	5.36851
ODC1	1.23143	1.1e-15	1.23143
RPS6KC1	1.06436	7.5e-12	1.06436
SCN11A	-5.1225	0.000383372	5.1225
NPIPB9	-4.28471	0.0218324	4.28471
CAB39L	2.49612	6.88e-61	2.49612
ZNF852	-1.355	1.43e-11	1.355
UPP1	2.54205	8.92e-16	2.54205
JADE1	-1.24233	1.48e-31	1.24233
C6orf48	-2.37082	4.5e-59	2.37082
FIGNL1	1.7472	6.32e-13	1.7472
CLIP4	3.80745	3.93e-15	3.80745
STK32A	-4.95876	0.000534337	4.95876
HMGCLL1	3.93663	0.00229118	3.93663
FAM184A	1.67828	4.28e-06	1.67828
TTC14	-1.12561	3e-05	1.12561
ICA1L	1.1246	4.26e-11	1.1246
EPHA7	5.45563	4.38e-07	5.45563
CLTC	1.20889	5.34e-38	1.20889
IL1R1	4.91276	5.93e-98	4.91276
LOC101929372	3.13299	1.92e-06	3.13299
ZSCAN30	-1.3764	4.42e-08	1.3764
DNM1	2.38277	1.82e-37	2.38277
FAM195B	-1.33512	2.59e-25	1.33512
C18orf54	1.77559	1.19e-09	1.77559
SDAD1	-1.02451	5.45e-15	1.02451
PLCE1	4.12442	1.02e-38	4.12442
TSNAXIP1	1.92374	1.09e-06	1.92374
TMPRSS6	1.43932	0.00123081	1.43932
TMEM161B	-1.55295	1.02e-11	1.55295
KIF6	4.17937	3.04e-05	4.17937
SERPINA4	-9.23945	9.33e-14	9.23945
HELLS	2.0585	1.55e-20	2.0585
PXK	-1.73886	8.74e-45	1.73886
ZCCHC7	-1.89738	1.15e-37	1.89738
LIMCH1	5.1196	2.72e-27	5.1196
MICB	3.6282	6.27e-55	3.6282
SYTL2	3.26976	1.11e-105	3.26976
GAPDH	1.00435	8.35e-13	1.00435
IFIT3	2.49149	5.08e-11	2.49149
ZNF718	4.95043	4.42e-47	4.95043
SLC1A3	4.13232	0.0030561	4.13232
EEF1D	-1.01431	1.29e-24	1.01431
ZNF84	-1.32679	3.57e-09	1.32679
BIN2	3.33264	0.000758705	3.33264
CECR2	1.16697	8.52e-17	1.16697
UHRF1	2.8065	2.15e-57	2.8065
HAGHL	-1.00537	6.39e-12	1.00537
ADGRG1	-1.52473	1.29e-31	1.52473
KRBA1	-1.50144	7.1e-18	1.50144
SCAMP1	-1.09369	1.9e-11	1.09369
PHF3	-1.11513	1.3e-07	1.11513
SORBS1	3.1561	1.28e-05	3.1561
DHFR	1.28288	1.3e-17	1.28288
HSH2D	1.34375	1.48e-18	1.34375
BAHCC1	1.13381	4.91e-28	1.13381
SMC1B	1.51134	0.00044306	1.51134
MGC50722	-3.31395	0.0278119	3.31395
CYFIP2	-1.09682	2.63e-14	1.09682
REL	1.60379	3.34e-06	1.60379
HMCN2	-1.62519	0.012809	1.62519
FAM132B	1.63605	1.82e-06	1.63605
IGF1R	-8.72156	0	8.72156
WNT2B	2.65472	7.46e-08	2.65472
CDH18	5.12239	2.85e-50	5.12239
FGFR4	-1.74336	1.56e-36	1.74336
WWOX	1.79184	3.4e-68	1.79184
EYS	-2.84362	0.000752593	2.84362
CHN2	1.75244	2.45e-18	1.75244
FER1L5	2.15374	6.61e-05	2.15374
HOTS	-4.08257	4.58e-08	4.08257
PRSS23	-3.28472	1.93e-81	3.28472
TUBB	1.52363	2.57e-25	1.52363
LYRM7	-1.63169	6.41e-17	1.63169
ALDH1A3	-1.12327	2.21e-10	1.12327
MYBL1	-3.29406	3.11e-55	3.29406
TMEM116	1.0657	6.78e-11	1.0657
ADGRB2	2.55143	3.39e-83	2.55143
MFSD7	3.26952	1.55e-13	3.26952
CCR1	9.81426	6.9e-14	9.81426
HGFAC	-1.87521	9.25e-05	1.87521
PDE4B	-1.35482	9.01e-08	1.35482
ZNF221	1.97719	0.00295074	1.97719
CDCA3	1.4035	2.66e-19	1.4035
SPATA18	-1.80216	7.39e-23	1.80216
KIF2C	1.19266	1.01e-17	1.19266
RGL1	-1.48418	3.24e-08	1.48418
ALKBH6	1.45873	1.27e-29	1.45873
ADGRL2	4.19816	2.14e-66	4.19816
ZNF546	-1.05573	0.00196604	1.05573
USH1C	-3.41574	0.0240652	3.41574
METTL15	1.06169	8.61e-06	1.06169
NMNAT1	-1.03928	4.15e-13	1.03928
DTX4	-1.05126	3.23e-10	1.05126
RASGEF1B	-4.95321	7.99e-21	4.95321
SLC9B2	-1.98198	6.38e-27	1.98198
BEST1	-2.57837	1.25e-06	2.57837
PITPNM2	-2.11916	1.12e-57	2.11916
PCDH18	-2.74199	0.00129517	2.74199
SLC10A7	1.30092	9.69e-06	1.30092
FOSL1	1.62357	0.0466153	1.62357
PBDC1	-1.24954	2.87e-21	1.24954
CABP4	-2.06903	0.0159511	2.06903
ZNF333	-1.61164	4.49e-07	1.61164
CSRP2	1.08145	0.00548362	1.08145
ETV2	1.08227	0.0271216	1.08227
FAAP24	1.59676	1.22e-10	1.59676
TMCO6	-1.04805	2.34e-16	1.04805
TPD52L1	-2.21233	7.83e-119	2.21233
AMOTL1	-2.62737	1.54e-175	2.62737
GMFG	3.44692	0.032355	3.44692
ABLIM3	2.0563	5.6e-34	2.0563
SLC24A1	-1.0301	1.59e-13	1.0301
C1orf54	-1.52188	0.00628732	1.52188
NDST1	-1.11688	9.89e-21	1.11688
DOK7	-1.83187	1.36e-36	1.83187
CNOT8	-1.0012	1e-24	1.0012
CCDC53	1.87634	3.4e-30	1.87634
SH3GL3	-2.1323	5.54e-05	2.1323
ADAMTSL3	-1.57051	4.79e-08	1.57051
MAGI2	1.42986	8.34e-07	1.42986
LINGO1	1.57782	9.66e-17	1.57782
ABCC4	-1.74663	0.00141826	1.74663
UMAD1	1.09045	1.45e-11	1.09045
CCDC151	3.04035	3.83e-15	3.04035
KLF13	-1.80964	2.92e-11	1.80964
ACHE	5.22013	8.43e-29	5.22013
APOE	-1.92451	2.75e-40	1.92451
CYB5R2	4.9748	0.000265842	4.9748
C6orf99	3.47302	5.49e-21	3.47302
TDRD7	2.13678	1.29e-69	2.13678
PLCH2	-1.72259	0.000165906	1.72259
ITGA10	1.52095	2.73e-07	1.52095
ERICH1	-1.13328	1.93e-16	1.13328
TLE1	1.42845	2.14e-66	1.42845
TUBA1C	1.55809	1.35e-35	1.55809
PCDHB6	-3.46253	0.00308612	3.46253
SLC25A46	-1.0353	4.25e-12	1.0353
MAPK12	1.55683	3.42e-33	1.55683
C15orf59	-2.18153	7.93e-14	2.18153
ITGB1BP2	1.65421	0.0299635	1.65421
PIK3R3	1.16859	1.82e-40	1.16859
SLC25A18	4.43823	4.03e-66	4.43823
CBX6	2.8193	5.37e-167	2.8193
PDZD4	1.56475	2.91e-30	1.56475
TUBB6	1.71798	7.74e-36	1.71798
RAPGEFL1	-1.85622	1.8e-31	1.85622
TMEM143	1.19285	4e-17	1.19285
RPL10	-1.37927	6.61e-39	1.37927
IMMP1L	1.02966	2.98e-08	1.02966
PPFIA4	-2.38562	1.35e-08	2.38562
CX3CL1	-1.41833	0.0273916	1.41833
UBE3D	-1.2087	1.06e-08	1.2087
TMEM132E	5.51957	0.000156522	5.51957
ST8SIA1	1.87044	0.00176634	1.87044
METTL10	-1.02159	6.21e-13	1.02159
TIMM9	-1.41391	8.41e-49	1.41391
EPHA4	6.05234	3.76e-173	6.05234
CFAP47	-4.27481	0.00216989	4.27481
PAX2	4.09821	0.000443823	4.09821
TMEM74B	-2.62627	0.0054526	2.62627
DUSP18	1.67631	6.12e-10	1.67631
KRBA2	1.07406	2.16e-13	1.07406
MED11	1.38319	7.78e-19	1.38319
ZNF33B	-1.37309	5.6e-08	1.37309
DUSP26	-2.79264	0.00952342	2.79264
STK32B	4.81227	0.000241729	4.81227
CFAP54	5.74907	1.12e-05	5.74907
RASGRP1	-6.45451	1.93e-44	6.45451
FN1	-1.56322	8.19e-31	1.56322
SPDYE5	-1.08076	0.00231543	1.08076
BCL2L10	2.18336	0.0370634	2.18336
FRMD7	6.28104	1.53e-07	6.28104
GPX8	-2.96331	3.03e-28	2.96331
EXPH5	-1.6733	4.09e-15	1.6733
STARD4	1.28067	0.00878506	1.28067
GATA4	-7.99316	5.12e-10	7.99316
JADE2	-1.29188	2.91e-39	1.29188
TMC5	1.80011	2.61e-28	1.80011
NEURL1B	-1.38444	3.96e-49	1.38444
SIMC1	-1.0686	4.17e-19	1.0686
TSPAN2	4.15098	5.07e-05	4.15098
STXBP5L	-2.03522	3.99e-09	2.03522
ERVH48-1	-1.56653	8.94e-05	1.56653
SPARC	3.94291	0.00559258	3.94291
ANKRD36C	-1.35021	3.67e-06	1.35021
MFGE8	-1.70206	5.23e-17	1.70206
KLK14	1.7843	0.0459063	1.7843
F2R	-1.59117	1.93e-08	1.59117
CST6	5.77137	0.000819815	5.77137
CTF1	1.72636	1.39e-11	1.72636
CTSO	-1.30815	1.27e-05	1.30815
CTSZ	1.63843	6.94e-59	1.63843
DGKA	2.53599	1.7e-48	2.53599
AKR1C1	-5.01583	2.7e-15	5.01583
AKR1C2	-7.03915	6.72e-10	7.03915
DNAH5	-1.24085	1.45e-06	1.24085
DNAH6	5.43147	4.16e-05	5.43147
DNAH14	-1.05235	5.97e-07	1.05235
DSCAM	-2.19346	5.24e-35	2.19346
DUSP4	2.48795	2.07e-84	2.48795
EDA	-1.58412	1.11e-07	1.58412
LPAR1	2.11632	0.00569327	2.11632
EEF1A1	-1.93466	4.62e-80	1.93466
EEF1G	-1.17791	5.5e-28	1.17791
EFNB3	-1.44286	1.96e-15	1.44286
CELSR2	-4.01059	9.83e-295	4.01059
EIF4B	-1.41022	1.92e-84	1.41022
EMP1	1.27262	2.56e-06	1.27262
ENO1	1.79247	1.07e-52	1.79247
EPAS1	3.34463	2.16e-69	3.34463
EREG	-5.81787	4.56e-05	5.81787
ERN1	-2.32431	1.04e-38	2.32431
FABP5	3.14779	0.00167857	3.14779
GPC4	1.01418	1.5e-24	1.01418
FOXJ1	5.18353	0.000258528	5.18353
FLNA	1.14494	2.5e-24	1.14494
FLNB	-2.61319	2.11e-116	2.61319
XRCC6	1.0986	5.7e-31	1.0986
GABBR1	-1.24346	8.39e-11	1.24346
B4GALNT1	3.74941	7.56e-102	3.74941
GATM	-6.14552	4.22e-26	6.14552
GFRA2	-4.90452	0.00223636	4.90452
GFRA3	-1.53593	1.12e-11	1.53593
B4GALT1	-1.16611	4.68e-20	1.16611
GPLD1	-1.41788	3.64e-07	1.41788
GPER1	3.67291	1.53e-84	3.67291
IFIT2	2.72434	2.59e-26	2.72434
IFIT1	2.50259	3.77e-11	2.50259
IGBP1	-1.59611	1.99e-58	1.59611
IGFBP4	-1.91333	2.78e-38	1.91333
CYR61	-1.41343	5.47e-20	1.41343
IGSF1	-2.38213	2.22e-14	2.38213
EIF3E	-1.48758	5.62e-33	1.48758
IRAK2	2.77224	1.5e-05	2.77224
ACADSB	-1.09356	9.46e-14	1.09356
ACTG2	2.4726	0.0038825	2.4726
AHR	2.22657	5.36e-55	2.22657
AIM1	2.45484	6.49e-50	2.45484
AMBP	-3.56735	5.35e-26	3.56735
APOF	-2.75992	0.00675236	2.75992
APOD	3.2346	4.33e-26	3.2346
AQP5	3.7099	0.0403971	3.7099
AQP6	2.95294	3.67e-05	2.95294
AREG	-12.7681	5.82e-66	12.7681
ARF3	1.01606	1.39e-25	1.01606
ARL4D	2.46835	1.91e-47	2.46835
ASIP	-2.74288	0.000413391	2.74288
ATP2B1	1.51907	1.07e-16	1.51907
ATP2B2	-4.92156	0.0137238	4.92156
ATP6V1B1	-1.48303	3.85e-11	1.48303
ADGRB1	-1.09073	8.84e-07	1.09073
CFB	1.07259	0.0260338	1.07259
BHMT	-5.6367	0.00845643	5.6367
BLK	-6.26517	8.43e-06	6.26517
BNC1	-2.10843	0.00743982	2.10843
BMP7	2.05133	1.03e-29	2.05133
BTC	-5.07037	6.49e-17	5.07037
C5	1.07304	3.1e-05	1.07304
CAMLG	-1.36942	1.58e-89	1.36942
SERPINA6	-6.37626	4.72e-07	6.37626
CCNF	1.47966	5.47e-31	1.47966
CDC25A	1.87405	2.93e-29	1.87405
CDH3	3.22224	1.61e-165	3.22224
CDK7	-1.66662	2.45e-52	1.66662
CDO1	3.23264	0.0230988	3.23264
CEBPG	-1.76095	1.28e-49	1.76095
CEL	-1.37239	0.0027724	1.37239
CTSC	-2.295	6.09e-56	2.295
CLU	1.94467	8.66e-48	1.94467
CCR7	2.0085	7.87e-07	2.0085
COL2A1	4.18864	1.67e-46	4.18864
COL4A6	1.85552	5.36e-16	1.85552
COL6A2	-2.82671	0.00136602	2.82671
COL9A2	1.63937	4.93e-38	1.63937
SLC31A2	1.26287	3.65e-13	1.26287
CPE	1.83639	1.21e-60	1.83639
CRYAB	-3.08414	0.00263075	3.08414
CRYM	-7.52087	4.49e-08	7.52087
CSPG4	-2.35439	1.21e-25	2.35439
CYB561	1.02286	4.04e-33	1.02286
DPP4	3.51919	0.0106172	3.51919
E2F5	-1.52105	6.98e-23	1.52105
EDN2	-3.75694	6.9e-26	3.75694
EEF1A2	3.55391	3.64e-259	3.55391
EEF2	-1.33962	1.39e-33	1.33962
EFNA5	-1.0068	1.07e-11	1.0068
EGR1	1.64564	6.75e-14	1.64564
ADGRE1	6.12697	2.49e-07	6.12697
ENO3	1.1358	1.58e-12	1.1358
EPHX2	-1.65265	3.42e-28	1.65265
STX2	1.55924	2.73e-22	1.55924
ERBB3	-1.61763	1e-39	1.61763
EYA3	1.04398	4.5e-19	1.04398
ACSL1	1.71756	8.24e-10	1.71756
FBN2	2.21422	8.8e-07	2.21422
FHIT	-2.71086	3.34e-07	2.71086
FLII	1.22659	3.78e-43	1.22659
FMO4	1.93127	3.98e-16	1.93127
FMOD	-4.69087	1.78e-59	4.69087
FYN	-2.50842	2.22e-13	2.50842
IFI6	3.77552	2.83e-33	3.77552
GAS1	2.75236	6.52e-08	2.75236
GATA3	2.18781	1.99e-179	2.18781
GBP1	3.57136	2.51e-46	3.57136
GLP1R	-2.92689	0.000167662	2.92689
GLUL	-1.36965	1.63e-35	1.36965
GNB3	1.4306	1.22e-08	1.4306
GPX2	1.82979	3.94e-05	1.82979
GPX3	5.11688	7.7e-125	5.11688
GRIK5	2.4913	0.0012439	2.4913
GUCA1B	-1.48189	5.08e-06	1.48189
H2AFX	1.56111	1.35e-40	1.56111
HLA-A	1.9808	6.15e-32	1.9808
HLA-DRB5	6.06197	6.13e-08	6.06197
HLF	-2.29279	3.85e-10	2.29279
HLA-G	1.80647	2.6e-11	1.80647
HMOX1	2.01094	1.74e-14	2.01094
HNRNPA2B1	1.07337	1.47e-15	1.07337
HNRNPD	1.58894	5.35e-89	1.58894
HPCA	2.44179	0.000237382	2.44179
HOXB2	6.08341	1.35e-06	6.08341
HOXB3	4.67428	1.45e-07	4.67428
HRC	2.06665	0.0193051	2.06665
HSPA6	3.15263	1.62e-07	3.15263
ID3	-2.43362	8.9e-58	2.43362
IGFBP6	1.16274	3.75e-05	1.16274
INHA	2.6713	1.04e-16	2.6713
INHBB	2.19434	7.09e-93	2.19434
INSM1	-2.23395	3.16e-10	2.23395
ITGA2	-2.00726	9.57e-25	2.00726
ITGAE	1.78783	6.54e-38	1.78783
ITGAL	-1.95852	4.44e-09	1.95852
ITGB8	3.08888	2.22e-05	3.08888
ITPKA	2.18808	3.88e-09	2.18808
JUP	1.37739	1.01e-40	1.37739
CD82	-1.68687	4.16e-43	1.68687
KCNF1	-3.42043	5.62e-29	3.42043
KCNG1	-2.53423	2.05e-45	2.53423
KCNJ3	8.84356	6.68e-43	8.84356
KCNJ13	2.6181	0.000435227	2.6181
KCNK3	-3.05041	0.0384174	3.05041
KCNN4	4.69245	5.51e-49	4.69245
KIF3C	1.78677	5.18e-57	1.78677
KISS1	2.2001	0.000406729	2.2001
KPNA2	1.80026	4.86e-44	1.80026
KPNA5	-1.07827	0.000908237	1.07827
KRT13	-3.30382	1.29e-05	3.30382
KRT15	-1.86275	1.15e-07	1.86275
KRT81	-3.72797	1.65e-73	3.72797
KRT85	-2.9615	0.0260929	2.9615
AFF3	1.2101	1.25e-25	1.2101
LAG3	1.3789	0.0015575	1.3789
LAMA4	-6.41493	1.88e-06	6.41493
LAMC1	1.12389	5.31e-38	1.12389
LEPR	1.44005	0.000135551	1.44005
LOX	-2.83756	9.02e-11	2.83756
LOXL2	1.49255	3.35e-09	1.49255
LRP1	-1.2939	1.31e-12	1.2939
LTF	6.41918	8.22e-06	6.41918
LYN	8.7077	2.54e-16	8.7077
MAP1A	1.99974	9.4e-14	1.99974
MATK	-1.64002	5.79e-33	1.64002
MATN2	2.37224	2.11e-116	2.37224
MATN3	1.32757	8.12e-10	1.32757
MC1R	1.28308	2.85e-34	1.28308
ME1	1.59269	7.08e-24	1.59269
MEIS1	2.75709	0.0239302	2.75709
MEIS2	6.76504	2.07e-22	6.76504
MFNG	3.32702	0.0024461	3.32702
MGAT3	1.49124	0.0400909	1.49124
MKI67	1.72634	1.91e-22	1.72634
MMP19	-1.61295	1.23e-07	1.61295
MN1	-1.28936	0.00930756	1.28936
MSN	-4.45901	0.0226297	4.45901
MTAP	-1.65271	7.8e-21	1.65271
MUC2	3.84004	1.89e-07	3.84004
MUC5B	-3.13338	1.62e-208	3.13338
MVD	1.16989	1.02e-13	1.16989
MYBPC1	-5.80853	7.9e-06	5.80853
MYC	-1.83767	1.19e-35	1.83767
CEACAM6	1.79662	2.16e-05	1.79662
NDUFA6	1.01715	2.82e-44	1.01715
NGFR	1.80311	6.53e-08	1.80311
NME3	1.74841	3.38e-38	1.74841
NPTX1	2.45712	0.00112811	2.45712
OCLN	-1.50851	5.33e-45	1.50851
TNFRSF11B	8.94663	1e-52	8.94663
P2RX7	-4.39596	0.00146565	4.39596
PABPC1	-1.69928	5.79e-53	1.69928
FURIN	-1.08313	4.58e-20	1.08313
PCDH8	-1.29033	0.000295464	1.29033
PCNA	1.44214	3.5e-29	1.44214
PDCD2	-1.09879	3.58e-23	1.09879
PDZK1	-7.52509	1.78e-193	7.52509
SERPINF1	1.30924	1.49e-07	1.30924
PGAM1	1.50757	1.16e-26	1.50757
PIP	-4.62738	4.83e-05	4.62738
PITX1	-1.60942	1.98e-30	1.60942
PLCG2	1.55103	1.36e-27	1.55103
POLA2	1.99287	2.22e-48	1.99287
POU3F1	-2.80158	0.00157673	2.80158
POU6F1	-2.98756	6.07e-18	2.98756
PPL	1.73389	2.33e-46	1.73389
HHEX	1.38443	6.59e-10	1.38443
PRKCA	1.72163	2.89e-22	1.72163
MAPK3	1.13715	1.1e-24	1.13715
MAPK4	7.0018	8.38e-11	7.0018
MAPK11	1.72831	4.64e-52	1.72831
MAPK10	3.85477	9.86e-30	3.85477
MAP2K5	-1.90832	9.99e-45	1.90832
MAP2K6	2.22206	1.08e-17	2.22206
PRTN3	-1.22671	0.0144355	1.22671
PSMA7	1.00699	4.44e-26	1.00699
PSMB2	1.01932	3.37e-21	1.01932
PSMB9	4.32121	8.75e-26	4.32121
PSMC5	1.2694	6.66e-72	1.2694
PSMD1	1.26917	9.14e-43	1.26917
PSMD2	1.18788	6.2e-31	1.18788
QSOX1	2.87557	3.18e-115	2.87557
PTPN9	-1.36792	3.14e-39	1.36792
PTPRM	-3.53472	0.00966576	3.53472
PTX3	-4.31635	0.00462548	4.31635
PVALB	5.61504	8.82e-70	5.61504
PYGL	2.6887	1.45e-47	2.6887
RABIF	1.01056	2.32e-28	1.01056
RALB	1.40125	2.18e-82	1.40125
RBBP8	-1.01333	2.19e-10	1.01333
RDH5	1.76561	0.0229739	1.76561
RECQL	1.64832	5.3e-11	1.64832
RENBP	-2.33559	0.0394766	2.33559
RFNG	-1.02577	2.28e-16	1.02577
RGS16	1.9998	8.09e-35	1.9998
ROBO1	1.81851	3.81e-67	1.81851
ROBO2	-2.83813	3.19e-10	2.83813
RPA1	1.75095	5.83e-64	1.75095
RPA3	1.91775	4.48e-33	1.91775
RXRA	1.21857	1.34e-33	1.21857
S100A8	5.8095	2.48e-07	5.8095
S100A10	2.16342	2.11e-63	2.16342
CCL5	2.92897	3.93e-13	2.92897
SDC2	-5.3397	5.94e-192	5.3397
SECTM1	1.48959	2.43e-07	1.48959
SEPW1	1.23786	7.23e-29	1.23786
SCG5	-4.27001	0.00130818	4.27001
SH3BGRL	3.20843	7.54e-108	3.20843
SHOX2	3.03028	9.1e-20	3.03028
SLC6A6	1.39816	8.09e-36	1.39816
SLC7A1	-1.14466	8.01e-29	1.14466
SLC9A1	2.19392	3.84e-79	2.19392
SLC18A2	-1.44496	2.65e-06	1.44496
SLC22A4	1.35033	5.87e-11	1.35033
SLC22A5	-1.94878	1.31e-51	1.94878
SLIT1	1.42214	1.13e-24	1.42214
SLPI	-5.76093	1.39e-05	5.76093
SNCB	-1.37338	0.00625068	1.37338
SNCG	7.79872	0	7.79872
FSCN1	3.35005	3.2e-106	3.35005
SNTA1	1.13418	1.6e-08	1.13418
SNX1	-1.28359	1.15e-88	1.28359
SORD	-1.23575	3.65e-34	1.23575
SORL1	-1.65	4.6e-64	1.65
SOX2	10.152	3e-16	10.152
SOX4	-2.33109	1.35e-37	2.33109
SP4	1.47484	3.01e-13	1.47484
SPAG4	1.97621	7.89e-13	1.97621
SQLE	1.55824	4.38e-40	1.55824
STC1	3.33899	1.94e-27	3.33899
CDKL5	4.60308	2.13e-31	4.60308
AURKC	-3.68213	0.0286361	3.68213
STXBP1	1.72026	9.35e-44	1.72026
SYT5	-4.3794	1.58e-07	4.3794
TCF7	1.25586	0.0125845	1.25586
TFAP2B	4.13573	1.38e-23	4.13573
TFAP2C	-1.24428	4.52e-40	1.24428
TFAP4	-1.30389	1.95e-17	1.30389
TFF1	-4.5256	1.97e-196	4.5256
TFF3	-2.20096	1.04e-81	2.20096
TFR2	-2.66002	0.0153832	2.66002
TGFBR2	1.23653	1.53e-17	1.23653
THBS2	-1.18106	0.00964604	1.18106
THRSP	-3.01175	4.01e-14	3.01175
TIAM1	-2.96978	1.49e-266	2.96978
TIMP2	2.72729	5.39e-63	2.72729
TK1	2.94663	4.66e-64	2.94663
ICAM5	-1.35816	1.84e-14	1.35816
TLR2	4.83262	1.91e-19	4.83262
TLR5	-1.68893	2.58e-09	1.68893
CLDN5	2.5166	0.000139481	2.5166
TNNC2	3.14106	1.01e-06	3.14106
TNNI1	1.15813	9e-08	1.15813
TRIP6	1.9079	2.57e-18	1.9079
PHLDA2	3.11896	9.98e-89	3.11896
TNFSF4	-3.99488	0.000146218	3.99488
UBE2B	-1.21325	4.58e-28	1.21325
UCP3	-1.34192	0.015414	1.34192
VGF	2.40584	6.68e-42	2.40584
WNT5A	1.70888	0.00484446	1.70888
WNT8B	-1.74211	0.000185618	1.74211
WNT10B	1.67185	4.55e-11	1.67185
WNT9A	1.24386	1.54e-07	1.24386
YWHAH	1.22802	4.9e-46	1.22802
ZFP36	1.08032	1.2e-16	1.08032
ZIC1	-1.16883	6.45e-11	1.16883
ZNF264	-1.66969	2.28e-23	1.66969
ZNF45	1.47624	3.42e-28	1.47624
ZNF132	-1.71132	4.95e-12	1.71132
ZNF157	2.30286	0.00130174	2.30286
ZNF165	-1.29505	8.47e-17	1.29505
BSN	-1.68952	1.71e-25	1.68952
SLC30A3	3.04349	4.23e-31	3.04349
PTP4A1	-1.17944	5.86e-54	1.17944
CXCR4	2.60389	1.7e-70	2.60389
FZD5	1.22036	1.27e-17	1.22036
SCG2	3.32157	0.00402012	3.32157
ADAM12	-3.44458	0.0132874	3.44458
GPR68	-5.82496	5.52e-60	5.82496
SLC7A5	-2.5362	2.09e-65	2.5362
NRIP1	-2.99529	3.03e-48	2.99529
FZD7	1.10168	1.75e-13	1.10168
FZD9	1.52752	3.56e-05	1.52752
HIST1H2AI	1.37255	1.9e-05	1.37255
HIST1H2AK	-1.24803	0.00607665	1.24803
HIST2H2AC	1.05487	0.000751414	1.05487
HIST1H2BG	2.83647	6.29e-21	2.83647
HIST1H2BF	1.56802	0.000722081	1.56802
HIST1H2BE	4.44663	2.35e-05	4.44663
HIST1H2BC	2.3643	3.71e-23	2.3643
HIST2H2BE	1.50076	8.31e-17	1.50076
HIST1H3A	2.80945	0.00120098	2.80945
HIST1H3D	1.36059	0.000284226	1.36059
HIST1H3C	4.17124	0.00152958	4.17124
HIST1H3G	3.53166	1.06e-12	3.53166
HIST1H3B	1.64664	0.0189621	1.64664
HIST1H4A	4.34387	0.00380875	4.34387
HIST1H4D	3.5034	0.00141826	3.5034
HIST1H4H	1.8845	2.03e-13	1.8845
HIST1H4E	1.27208	0.0159329	1.27208
TAGLN2	2.4553	2.48e-98	2.4553
BFSP2	-5.09788	6.76e-43	5.09788
SOAT2	-2.22725	0.00305514	2.22725
RAD54L	1.06875	5.42e-14	1.06875
FOXN1	-1.37561	0.00604678	1.37561
TTF2	1.04897	1.86e-29	1.04897
TPST2	1.43009	2.84e-19	1.43009
KLF11	-1.05521	1.16e-14	1.05521
TEAD2	-1.39636	1.1e-18	1.39636
IRS4	1.59925	0.00287522	1.59925
RAE1	1.08955	7.21e-27	1.08955
GALR3	-2.16567	0.000549145	2.16567
PPFIBP2	1.97175	1.05e-40	1.97175
PPFIA2	2.44636	0.0366462	2.44636
PPFIA1	-1.26937	4.88e-47	1.26937
SLC43A1	-3.86404	1.44e-68	3.86404
CNTNAP1	2.66622	1.23e-16	2.66622
HAT1	1.34818	4.09e-15	1.34818
COPS3	1.24913	1.67e-27	1.24913
CHST1	-1.61658	0.00561133	1.61658
BCAS1	1.62086	1.29e-16	1.62086
PIR	2.90369	8.31e-61	2.90369
BHLHE40	-1.9852	4.83e-70	1.9852
DEGS1	1.72954	7.83e-85	1.72954
KMO	1.54416	0.00148144	1.54416
LY6D	2.14064	0.000551859	2.14064
RDH16	3.70356	1.01e-71	3.70356
STC2	-4.07795	8.62e-197	4.07795
TP63	1.41024	3.22e-08	1.41024
HSD17B6	1.88335	9.25e-16	1.88335
SKAP1	7.60072	1.11e-09	7.60072
UNC5C	6.4989	5.92e-17	6.4989
OASL	3.60601	1.64e-39	3.60601
AOC3	1.35123	0.014294	1.35123
PCDHGB4	-4.42521	3.19e-10	4.42521
KCNK5	-3.62636	2.44e-80	3.62636
CHRD	1.24236	1.26e-05	1.24236
NCOA1	1.18797	2.43e-60	1.18797
SOCS1	1.29166	2.65e-05	1.29166
IRS2	-1.65235	1.04e-21	1.65235
EIF3H	-1.62407	1.46e-89	1.62407
EIF3I	1.03778	5.34e-27	1.03778
EIF3J	-1.00248	1.8e-21	1.00248
GALNT4	-2.18775	1.26e-07	2.18775
MRPL40	1.25674	3.59e-26	1.25674
CTSF	-2.15826	1.71e-38	2.15826
MYOM1	1.53364	0.0151513	1.53364
HRK	-4.28377	6.24e-35	4.28377
TNFSF9	2.34385	4.19e-07	2.34385
TNFRSF14	1.95586	0.000923197	1.95586
NR5A2	-3.1496	4.55e-41	3.1496
DLK1	3.89888	8.06e-05	3.89888
TNFRSF10B	-1.17907	4.76e-23	1.17907
DYRK4	-1.43335	1.07e-13	1.43335
GALR2	1.73063	0.0211701	1.73063
NRP1	3.86174	1.34e-10	3.86174
SOCS2	-4.05198	3.46e-19	4.05198
GGH	1.45896	3.36e-21	1.45896
WISP2	-4.15478	2.14e-19	4.15478
KAT2B	1.55072	3.76e-18	1.55072
PROZ	-1.44343	0.016376	1.44343
ST3GAL5	-4.31325	1.27e-95	4.31325
TIMELESS	1.76533	1.23e-47	1.76533
SKAP2	1.7903	7.75e-15	1.7903
CDK5R2	4.05565	3.91e-06	4.05565
SOCS3	2.82154	9.59e-81	2.82154
CCRL2	4.06499	0.00435857	4.06499
RPL14	-1.37279	1.42e-45	1.37279
GPRC5A	3.84804	5.02e-85	3.84804
KITLG	2.84762	3.59e-24	2.84762
OSMR	1.24693	4.89e-32	1.24693
CHI3L2	4.06534	0.0118416	4.06534
IRF7	1.5951	2.57e-15	1.5951
ANXA2	1.17054	8.5e-27	1.17054
CAPN5	5.17656	4.27e-75	5.17656
CA8	-4.11416	1.01e-122	4.11416
CCNG1	-2.37484	1.11e-170	2.37484
CDR1	3.02505	2.71e-22	3.02505
E2F2	2.53826	1.5e-39	2.53826
EFNB2	4.72599	1.99e-179	4.72599
EIF4EBP1	-1.20746	1.03e-20	1.20746
FABP3	2.32457	3.63e-05	2.32457
FASN	1.6558	1.53e-22	1.6558
FCN2	-4.13442	0.00550621	4.13442
FEN1	1.47652	3.25e-23	1.47652
FGF11	1.0915	6.08e-05	1.0915
FGF12	2.95718	1.68e-88	2.95718
FKBP1B	3.79368	2.58e-09	3.79368
GBP2	1.60391	1.55e-14	1.60391
GGT5	-3.47871	2.08e-16	3.47871
HNF4G	-4.42709	4.49e-29	4.42709
IREB2	-1.0216	5.16e-11	1.0216
LLGL1	1.00668	3.03e-17	1.00668
PSPN	-2.56045	0.00673857	2.56045
PSMB8	5.51384	5.18e-56	5.51384
SLC1A1	-6.22984	1.74e-35	6.22984
SREBF1	1.37478	1.25e-17	1.37478
SEMA3F	1.01457	1.3e-15	1.01457
GBF1	1.0048	2.35e-27	1.0048
USP2	1.44055	7.36e-08	1.44055
SYNGR3	2.94944	1.16e-37	2.94944
NEURL1	2.27808	4.1e-29	2.27808
IL32	4.27839	0.000194256	4.27839
CYTH3	1.23225	4.72e-22	1.23225
KLF4	-1.36137	6.74e-20	1.36137
COPS2	-1.16923	2.41e-13	1.16923
TRIP10	2.89089	4.61e-48	2.89089
SEMA4F	1.6296	5.18e-24	1.6296
MED27	1.23074	1.8e-13	1.23074
[truncated: 2,129 more rows]
