# Supplementary material for: A tumor-agnostic, topology-informed scoring framework for drug repurposing: application to CDK4/6 inhibitor resistance in HR+ breast cancer
Source: Research Square preprint supplement (doi:10.21203/rs.3.rs-6447930/v1), 2025-05-06
Supplement: Supplementary file 15 [file e1592f63a8a43b5070caaa0a.xlsx]

## Sheet: Sheet1
Table S4
Summary of the binding energy and hydrogen bond details regarding the stable binding mode of Sorafenib with the two targets
Mode Number	Target Name	Binding Energy (kcal/mol)		Amino Acid Residue	H-bonding Distance
1	FGFR3		-8.646	Arginine-570	2 Å
					4.3 Å
				Lysine-560	3 Å
					3.4 Å
12	FLT3		-8.383	Cysteine-694	2.1 Å
					2.6 Å
				Phenylalanine-830	2.7 Å
